# Supplementary material for: Usage patterns of blue flower color representation by Encyclopedia of Life content providers
Source: Biodivers Data J. 2014 Aug 11;(2):e1143. doi: 10.3897/BDJ.2.e1143 (PMC4152829; doi:10.3897/BDJ.2.e1143)
Supplement: Supplementary material 1 — Final scripts and graph methods [file biodiversity_data_journal-2-e1143-s001.r]

#January 31, 2014
#graphing for "Color representation by Encyclopedia of Life Content Providers"
#Katja Seltmann (enicospilu@gmail.com)


#conversion from rgb to hsv values
#clears r brain
rm(list=ls())

#import data set used in distance analysis and graphing
comp.dat <- read.delim("master_analysis_color.tsv", header = TRUE)
data <- comp.dat[,10:12]
datat <- t(data) #transpose
datahvc <- rgb2hsv(datat)
hsvdata <- t(datahvc)

#dataset with converted hsv values
write.table(hsvdata, "rgb2hsv_master.tsv", sep="\t", row.names=TRUE , col.names=TRUE, quote=FALSE)

---------------------------------------

#simple scatter plot with abline for each pure hue
rm(list=ls())
hsv.values <- read.delim("master_analysis_color.tsv",header = TRUE)	
hsvdata <- hsv.values[,22:21]
attach(hsvdata)

pdf(file='figures/scatter_with_color_lines.pdf')
par(las=2)
par(mar = c(11, 11, 2, 2))
plot(hsvdata,cex.axis=0.5,pch=20, main="individual color points for images", xlab="",ylab="",xaxt="n")
abline(h=40, col = "red",lwd=2)
abline(h=-26.67, col = "green",lwd=2)
abline(h=6.67, col = "blue",lwd=2)
abline(h=23.33, col = "magenta",lwd=2)
abline(h=-10.00, col = "cyan",lwd=2)

dev.off()

## reset the graphics display to default
par(def.par)

detach(hsvdata)


----------------------------------
#median converted_hue value per species, represented as histogram where y-axis is number of occurrences within the bin

rm(list=ls())
data <- read.delim("master_analysis_color.tsv",header = TRUE, )	
counts <- tapply(data$converted_hue, list(data$Species),median)

pdf(file='figures/color_species_histogram2.pdf')
par(mar = c(11, 5, 2, 2))

hist(counts,col=c( rgb(255,0,0,,maxColorValue=255), rgb(255,208,0,,maxColorValue=255), rgb(128,255,0,,maxColorValue=255), rgb(0,255,13,,maxColorValue=255), rgb(0,255,179,,maxColorValue=255), rgb(0,187,255,,maxColorValue=255), rgb(0,25,255,,maxColorValue=255), rgb(128,0,255,,maxColorValue=255),rgb(255,0,230,,maxColorValue=255),rgb(255,0,72,,maxColorValue=255)),main = "Recorded Color Values", xlab="hue values", ylab="number species")

dev.off()

## reset the graphics display to default

#color values for each bar represent the midpoint value of the bin
# converted value	h value (degree)	rgb value
# -55	18	rgb(255,0,0,,maxColorValue=255)
# -45	49	rgb(255,208,0,,maxColorValue=255)
# -35	90	rgb(128,255,0,,maxColorValue=255)
# -25	120	rgb(0,255,13,,maxColorValue=255)
# -15	162	rgb(0,255,179,,maxColorValue=255)
# -5	196	rgb(0,187,255,,maxColorValue=255)
# 5	234	rgb(0,25,255,,maxColorValue=255)
# 15	270	rgb(128,0,255,,maxColorValue=255)
# 25	306	rgb(255,0,230,,maxColorValue=255)
# 35	343	rgb(255,0,72,,maxColorValue=255)

----------------------------------

#median value of hues
rm(list=ls())
data <- read.delim("master_analysis_color.tsv",header = TRUE, )	
median.converted <- median(data$converted_hue)
median.degree <- median(data$h_degree)
