# Supplementary material for: Usage patterns of blue flower color representation by Encyclopedia of Life content providers
Source: Biodivers Data J. 2014 Aug 11;(2):e1143. doi: 10.3897/BDJ.2.e1143 (PMC4152829; doi:10.3897/BDJ.2.e1143)
Supplement: Supplementary material 2 — Image information and data [file biodiversity_data_journal-2-e1143-s002.xlsx]

## Sheet: Sheet1
Species	Family	Common_Name	Lat	Long	Elevation_meters	Alpine	Locality	North_America	Locality_Notes	R	G	B	Link	Notes	h	s	v	h_degree	s_percent	v_percnet	converted_hue	specimen_number	Blue in Name?	Purple in Name?	URI
Ageratum houstonianum	Asteraceae	Floss Flower	20.8723	-156.312	23		Pololei Haiku, Maui	No	introduced	180	180	201	http://eol.org/data_objects/1991710		0.666667	0.104478	0.788235	240	10	79	6.66667	179			http://purl.obolibrary.org/obo/PATO_0000318
Mertensia paniculata	Boraginaceae	Tall Bluebells	63.5016	-150.674	946	x	Denali National Park, Alaska, US		native	200	174	222	http://eol.org/data_objects/23373422	approximate	0.756944	0.216216	0.870588	272.5	22	87	15.6944	988	Y		http://eol.org/schema/terms/purplish-blue
Mertensia paniculata	Boraginaceae	Tall Bluebells	59.8785	-150.395	1020	x	Kenai Penninsula, Alaska		native	86	113	174	http://eol.org/data_objects/22729904		0.61553	0.505747	0.682353	221.591	51	68	1.55303	985	Y		http://eol.org/schema/terms/greenish-blue
Mertensia paniculata	Boraginaceae	Tall Bluebells	61.2761	-138.751	848		Canada, Yukon Territory, Kluane Lake		native	144	158	199	http://eol.org/data_objects/23388304		0.624242	0.276382	0.780392	224.727	28	78	2.42424	987	Y		http://eol.org/schema/terms/greenish-blue
Polemonium boreale	Polemoniaceae	Northern Jacob's-ladder	60.7212	-135.057	696		North America, Canada,Yukon Territory, Whitehorse		native	180	146	215	http://eol.org/data_objects/23357204		0.748792	0.32093	0.843137	269.565	32	84	14.8792	986			http://eol.org/schema/terms/purplish-blue
Anemone narcissiflora var. monantha	Ranunculaceae	Narcissus Thimbleweed	56.75	-133	71		Tongass National Forest, Sitka, Alaska, US		native	224	213	194	http://eol.org/data_objects/23372359		0.105556	0.133929	0.878431	38	13	88	-49.4444	979			http://purl.obolibrary.org/obo/PATO_0001944
Brodiaea coronaria	Asparagaceae	Crown Brodiaea	42.544	-124.278	440		USA, Oregon, Curry County		native	121	71	154	http://eol.org/data_objects/22944407		0.767068	0.538961	0.603922	276.145	54	60	16.7068	888			http://eol.org/schema/terms/purplish-blue
Brodiaea coronaria	Asparagaceae	Crown Brodiaea	42.544	-124.278	440		USA, Oregon, Curry County		native	141	89	151	http://eol.org/data_objects/22944408		0.806452	0.410596	0.592157	290.323	41	59	20.6452	889			http://eol.org/schema/terms/purplish-blue
Iris macrosiphon	Iridaceae	Bowltube Iris	41.8234	-123.94	671		French Hill Road, Del Norte County, California		native	199	176	187	http://eol.org/data_objects/12517247		0.92029	0.115578	0.780392	331.304	12	78	32.029	840			http://eol.org/schema/terms/reddish-purple
Campanula californica	Campanulaceae	Swamp Harebell	39.373	-123.815	18		Jug Handle State Park, Mendocino County, California, US		native	103	98	130	http://eol.org/data_objects/12509768		0.692708	0.246154	0.509804	249.375	25	51	9.27083	712			http://eol.org/schema/terms/purplish-blue
Gentiana setigera	Gentianaceae	Mendocino Gentian	42.1869	-123.731	585		West of Kerby, Josephine, Oregon, US		native	94	110	211	http://eol.org/data_objects/23373053	approximate	0.643875	0.554502	0.827451	231.795	55	83	4.38746	854			http://eol.org/schema/terms/greenish-blue
Gentiana setigera	Gentianaceae	Mendocino Gentian	42.1869	-123.731	585		West of Kerby, Josephine, Oregon, US		native	92	108	219	http://eol.org/data_objects/23373051		0.645669	0.579909	0.858824	232.441	58	86	4.56693	855			http://eol.org/schema/terms/greenish-blue
Gentiana setigera	Gentianaceae	Mendocino Gentian	42.1869	-123.731	585		West of Kerby, Josephine, Oregon, US		native	38	46	153	http://eol.org/data_objects/23373050		0.655072	0.751634	0.6	235.826	75	60	5.50725	856			http://eol.org/schema/terms/greenish-blue
Brodiaea coronaria	Asparagaceae	Crown Brodiaea	42.2523	-123.694	405		Illinois River, Josephine, Oregon, US		native	61	120	210	http://eol.org/data_objects/17731639		0.600671	0.709524	0.823529	216.242	71	82	0.0671141	859			http://eol.org/schema/terms/greenish-blue
Brodiaea coronaria	Asparagaceae	Crown Brodiaea	42.2523	-123.694	405		Illinois River, Josephine, Oregon, US		native	109	134	221	http://eol.org/data_objects/17731640		0.629464	0.506787	0.866667	226.607	51	87	2.94643	860			http://eol.org/schema/terms/greenish-blue
Nemophila menziesii	Boraginaceae	Menzies' Baby-blue-eyes	38.9088	-123.693	46		North of Point Arena, Mendocino County, California		native	160	190	246	http://eol.org/data_objects/13265824		0.608527	0.349593	0.964706	219.07	35	96	0.852713	667	Y		http://eol.org/schema/terms/greenish-blue
Gentiana setigera	Gentianaceae	Mendocino Gentian	42.0393	-123.658	771		Near Waldo, Josephine, Oregon, US		native	146	135	240	http://eol.org/data_objects/23862098		0.684127	0.4375	0.941176	246.286	44	94	8.4127	843			http://eol.org/schema/terms/purplish-blue
Gilia capitata subsp. capitata	Polemoniaceae	Bluehead Gilia	42.277	-123.646	391		Deer Creek Center - Selma, Oregon, Oregon, US		native	170	170	198	http://eol.org/data_objects/13156719		0.666667	0.141414	0.776471	240	14	78	6.66667	874	Y		http://purl.obolibrary.org/obo/PATO_0000318
Ceanothus integerrimus	Rhamnaceae	California Lilac	42.277	-123.646	391		Deer Creek Center - Selma, Oregon		native	185	185	209	http://eol.org/data_objects/13150119		0.666667	0.114833	0.819608	240	11	82	6.66667	864			http://purl.obolibrary.org/obo/PATO_0000318
Camassia leichtlinii subsp. suksdorfii	Asparagaceae	Large Camas	42.277	-123.646	391		Deer Creek Center - Selma, Oregon, Oregon, US		native	164	156	210	http://eol.org/data_objects/13149238		0.691358	0.257143	0.823529	248.889	26	82	9.1358	862			http://eol.org/schema/terms/purplish-blue
Camassia leichtlinii subsp. suksdorfii	Asparagaceae	Large Camas	42.277	-123.646	391		Deer Creek Center - Selma, Oregon, Oregon, US		native	175	157	233	http://eol.org/data_objects/13149239		0.70614	0.32618	0.913725	254.211	33	91	10.614	863			http://eol.org/schema/terms/purplish-blue
Camassia leichtlinii subsp. suksdorfii	Asparagaceae	Large Camas	42.277	-123.646	391		Deer Creek Center - Selma, Oregon, Oregon, US		native	135	89	143	http://eol.org/data_objects/13149236		0.808642	0.377622	0.560784	291.111	38	56	20.8642	861			http://eol.org/schema/terms/purplish-blue
Gentiana setigera	Gentianaceae	Mendocino Gentian	42.277	-123.646	391		Deer Creek Center - Selma, Oregon, Oregon, US		native	127	124	222	http://eol.org/data_objects/13156618		0.671769	0.441441	0.870588	241.837	44	87	7.17687	873			http://eol.org/schema/terms/purplish-blue
Gentiana setigera	Gentianaceae	Mendocino Gentian	42.277	-123.646	391		Deer Creek Center - Selma, Oregon, Oregon, US		native	127	123	185	http://eol.org/data_objects/13156613		0.677419	0.335135	0.72549	243.871	34	73	7.74194	870			http://eol.org/schema/terms/purplish-blue
Gentiana setigera	Gentianaceae	Mendocino Gentian	42.277	-123.646	391		Deer Creek Center - Selma, Oregon, Oregon, US		native	112	103	220	http://eol.org/data_objects/13156614		0.679487	0.531818	0.862745	244.615	53	86	7.94872	871			http://eol.org/schema/terms/purplish-blue
Gentiana setigera	Gentianaceae	Mendocino Gentian	42.277	-123.646	391		Deer Creek Center - Selma, Oregon, Oregon, US		native	111	95	213	http://eol.org/data_objects/13156615		0.689266	0.553991	0.835294	248.136	55	84	8.92655	872			http://eol.org/schema/terms/purplish-blue
Cynoglossum grande	Boraginaceae	Pacific Hound's Tongue	42.277	-123.646	391		Deer Creek Center - Selma, Oregon		native	139	156	233	http://eol.org/data_objects/13152263		0.636525	0.403433	0.913725	229.149	40	91	3.65248	865			http://eol.org/schema/terms/greenish-blue
Lupinus albifrons	Fabaceae	Silver Lupine	42.277	-123.646	391		Deer Creek Center - Selma, Oregon, Oregon		native	101	88	146	http://eol.org/data_objects/13159885		0.704023	0.39726	0.572549	253.448	40	57	10.4023	875			http://eol.org/schema/terms/purplish-blue
Myosotis discolor	Boraginaceae	Yellow-and-blue Forget-me-not	42.277	-123.646	391		Deer Creek Center - Selma, Oregon		native	226	232	246	http://eol.org/data_objects/13161360		0.616667	0.0813008	0.964706	222	8	96	1.66667	877	Y		http://eol.org/schema/terms/greenish-blue
Myosotis discolor	Boraginaceae	Yellow-and-blue Forget-me-not	42.277	-123.646	391		Deer Creek Center - Selma, Oregon		native	209	218	250	http://eol.org/data_objects/13161359		0.630081	0.164	0.980392	226.829	16	98	3.00813	876	Y		http://eol.org/schema/terms/greenish-blue
Myosotis discolor	Boraginaceae	Yellow-and-blue Forget-me-not	42.277	-123.646	391		Deer Creek Center - Selma, Oregon		native	222	224	245	http://eol.org/data_objects/13161361		0.652174	0.0938776	0.960784	234.783	9	96	5.21739	878	Y		http://eol.org/schema/terms/greenish-blue
Delphinium decorum	Ranunculaceae	Yellow-tinged Larkspur	42.277	-123.646	391		Deer Creek Center - Selma, Oregon		native	119	63	193	http://eol.org/data_objects/13152695		0.738462	0.673575	0.756863	265.846	67	76	13.8462	869			http://eol.org/schema/terms/purplish-blue
Delphinium decorum	Ranunculaceae	Yellow-tinged Larkspur	42.277	-123.646	391		Deer Creek Center - Selma, Oregon		native	116	63	186	http://eol.org/data_objects/13152694		0.738482	0.66129	0.729412	265.854	66	73	13.8482	868			http://eol.org/schema/terms/purplish-blue
Delphinium decorum	Ranunculaceae	Yellow-tinged Larkspur	42.277	-123.646	391		Deer Creek Center - Selma, Oregon		native	125	59	187	http://eol.org/data_objects/13152691		0.752604	0.684492	0.733333	270.938	68	73	15.2604	866			http://eol.org/schema/terms/purplish-blue
Delphinium decorum	Ranunculaceae	Yellow-tinged Larkspur	42.277	-123.646	391		Deer Creek Center - Selma, Oregon		native	143	72	208	http://eol.org/data_objects/13152693		0.753676	0.653846	0.815686	271.324	65	82	15.3676	867			http://eol.org/schema/terms/purplish-blue
Phacelia bolanderi	Plantaginaceae	Bolander's Phacelia	39.1512	-123.601	137		7 miles from the coast by highway 128, Mendocino County, California		native	191	173	178	http://eol.org/data_objects/25184001		0.953704	0.0942408	0.74902	343.333	9	75	35.3704	703			http://eol.org/schema/terms/reddish-purple
Phacelia bolanderi	Plantaginaceae	Bolander's Phacelia	38.8247	-123.577	354		Fishrock Road, Mendocino County, California		native	112	107	130	http://eol.org/data_objects/12522395		0.702899	0.176923	0.509804	253.043	18	51	10.2899	663			http://eol.org/schema/terms/purplish-blue
Phacelia bolanderi	Plantaginaceae	Bolander's Phacelia	39.0552	-123.465	243		Highland Ranch, Mendocino County, California		native	101	98	115	http://eol.org/data_objects/12522396		0.696078	0.147826	0.45098	250.588	15	45	9.60784	686			http://eol.org/schema/terms/purplish-blue
Camassia quamash subsp. maxima	Asparagaceae	Small Camas	48.5661	-123.455	62		Gore Nature Park, Brentwood Bay, British Columbia, Canada		native	142	121	206	http://eol.org/data_objects/18705274		0.707843	0.412621	0.807843	254.824	41	81	10.7843	951			http://eol.org/schema/terms/purplish-blue
Polemonium californicum	Polemoniaceae	California Polemonium	47.9331	-123.41	1818		Olympic National Park, Hurricane Ridge, Washington		native	130	123	176	http://eol.org/data_objects/12523790		0.688679	0.301136	0.690196	247.925	30	69	8.86792	948			http://eol.org/schema/terms/purplish-blue
Veronica cusickii	Plantaginaceae	Cusick's Speedwell	47.9331	-123.41	1818		Olympic National Park, Hurricane Ridge, Washington		native	72	58	72	http://eol.org/data_objects/12529787		0.833333	0.194444	0.282353	300	19	28	23.3333	950			http://purl.obolibrary.org/obo/PATO_0000321
Polemonium pulcherrimum	Polemoniaceae	Showy Jacob's-ladder	47.9331	-123.41	1818		Olympic National Park, Hurricane Ridge, Washington		native	182	134	197	http://eol.org/data_objects/12523800		0.793651	0.319797	0.772549	285.714	32	77	19.3651	949			http://eol.org/schema/terms/purplish-blue
Camassia quamash	Asparagaceae	Small Camas	44.5674	-123.332	145		Bald Hill Park, Corvallis, Oregon		native	68	59	136	http://eol.org/data_objects/5900749		0.686147	0.566176	0.533333	247.013	57	53	8.61472	939			http://eol.org/schema/terms/purplish-blue
Camassia quamash	Asparagaceae	Small Camas	44.4071	-123.321	80		William L. Finley National Wildlife Refuge		native	163	155	212	http://eol.org/data_objects/22927438		0.690058	0.268868	0.831373	248.421	27	83	9.00585	937			http://eol.org/schema/terms/purplish-blue
Downingia yina	Campanulaceae	Cascade Calicoflower	40.7398	-123.217	405		Big Flat, Trinity Center, Siskiyou County, California		native	166	143	124	http://eol.org/data_objects/12513406		0.0753968	0.253012	0.65098	27.1429	25	65	-52.4603	804			http://eol.org/schema/terms/orangish-red
Lupinus breweri	Fabaceae	Mat Lupine	41.942	-123.164	1859		Alex's hole, Southern Oregon, Oregon		native	172	155	195	http://eol.org/data_objects/13159941		0.7375	0.205128	0.764706	265.5	21	76	13.75	842			http://eol.org/schema/terms/purplish-blue
Campanula wilkinsiana	Campanulaceae	Wilkin's Harebell	40.903	-123.157	1119		Shasta-Trinity National Forest, Trinity County, California		native	166	174	221	http://eol.org/data_objects/13257957		0.642424	0.248869	0.866667	231.273	25	87	4.24242	807			http://eol.org/schema/terms/greenish-blue
Campanula wilkinsiana	Campanulaceae	Wilkin's Harebell	40.903	-123.157	1119		Shasta-Trinity National Forest, Trinity County, California		native	173	173	222	http://eol.org/data_objects/13257958		0.666667	0.220721	0.870588	240	22	87	6.66667	808			http://purl.obolibrary.org/obo/PATO_0000318
Iris macrosiphon	Iridaceae	Bowltube Iris	38.6306	-123.13	608		The Cedars, Sonoma County, California		native	138	112	188	http://eol.org/data_objects/12569911		0.723684	0.404255	0.737255	260.526	40	74	12.3684	642			http://eol.org/schema/terms/purplish-blue
Delphinium decorum	Ranunculaceae	Yellow-tinged Larkspur	38.4181	-123.104	29		Kortum Trail, Sonoma State Beach, Sonoma County, California		native	86	71	221	http://eol.org/data_objects/13152688		0.683333	0.678733	0.866667	246	68	87	8.33333	624			http://eol.org/schema/terms/purplish-blue
Camassia leichtlinii	Asparagaceae	Large Camas	43.3015	-123.101	288		Glide, Douglas County, Oregon, US		native	90	108	123	http://eol.org/data_objects/12509618	appears to be an old slide	0.575758	0.268293	0.482353	207.273	27	48	-2.42424	928			http://eol.org/schema/terms/greenish-blue
Gentiana setigera	Gentianaceae	Mendocino Gentian	39.0635	-123.094	1015		Red Mountain Area of Critical Environmental Concern, Mendocino County, California, US		native	99	110	171	http://eol.org/data_objects/19843441	approximate	0.641204	0.421053	0.670588	230.833	42	67	4.12037	687			http://eol.org/schema/terms/greenish-blue
Cynoglossum grande	Boraginaceae	Pacific Hound's Tongue	38.7798	-123.085	126		Cherry Creek, Sonoma County, California		native	155	128	212	http://eol.org/data_objects/23484234		0.720238	0.396226	0.831373	259.286	40	83	12.0238	662			http://eol.org/schema/terms/purplish-blue
Gilia capitata ssp. chamissonis	Polemoniaceae	Bluehead Gilia	38.3419	-123.055	35		Bodega Dunes, Sonoma County, California		native	92	66	99	eol.org/data_objects/13156722		0.79798	0.333333	0.388235	287.273	33	39	19.798	623	Y		http://eol.org/schema/terms/purplish-blue
Downingia yina	Campanulaceae	Cascade Calicoflower	41.0004	-123.048	2726	x	Trinity Alps, Trinity County, California		native	175	164	151	http://eol.org/data_objects/12513407		0.0902778	0.137143	0.686275	32.5	14	69	-50.9722	809			http://purl.obolibrary.org/obo/PATO_0001944
Iris macrosiphon	Iridaceae	Bowltube Iris	38.578	-122.989	469		Santa Rosa, Sonoma County, California		native	220	179	207	http://eol.org/data_objects/12517241		0.886179	0.186364	0.862745	319.024	19	86	28.6179	638			http://eol.org/schema/terms/reddish-purple
Iris douglasiana	Iridaceae	Douglas Iris	38.2327	-122.987	75		Tomales Point, Point Reyes National Seashore, California		native	121	122	191	http://eol.org/data_objects/5895775		0.664286	0.366492	0.74902	239.143	37	75	6.42857	602			http://eol.org/schema/terms/greenish-blue
Iris douglasiana	Iridaceae	Douglas Iris	37.9966	-122.98	29		Chimney Rock, Point Reyes National Seashore, Marin, US-CA		native	170	137	201	http://eol.org/data_objects/24050983		0.752604	0.318408	0.788235	270.938	32	79	15.2604	90			http://eol.org/schema/terms/purplish-blue
Delphinium decorum	Ranunculaceae	Yellow-tinged Larkspur	37.9966	-122.98	29		Chimney Rock, Pt. Reyes, Marin County, California		native	68	53	210	http://eol.org/data_objects/13152689		0.68259	0.747619	0.823529	245.732	75	82	8.25902	89			http://eol.org/schema/terms/purplish-blue
Downingia yina	Campanulaceae	Cascade Calicoflower	42.4551	-122.949	618		Table Rock, Jackson, Oregon		native	185	175	155	http://eol.org/data_objects/13153627		0.111111	0.162162	0.72549	40	16	73	-48.8889	885			http://purl.obolibrary.org/obo/PATO_0001944
Downingia yina	Campanulaceae	Cascade Calicoflower	42.4551	-122.949	618		Table Rock, Jackson, Oregon		native	178	170	226	http://eol.org/data_objects/13153626		0.690476	0.247788	0.886275	248.571	25	89	9.04762	884			http://eol.org/schema/terms/purplish-blue
Downingia yina	Campanulaceae	Cascade Calicoflower	42.4551	-122.949	618		Table Rock, Jackson, Oregon		native	151	144	177	http://eol.org/data_objects/21641165		0.70202	0.186441	0.694118	252.727	19	69	10.202	886			http://eol.org/schema/terms/purplish-blue
Campanula wilkinsiana	Campanulaceae	Wilkin's Harebell	41.0256	-122.918	1883		Kidd basin, Siskiyou County, California		native	143	75	182	http://eol.org/data_objects/13149418		0.772586	0.587912	0.713725	278.131	59	71	17.2586	814			http://eol.org/schema/terms/purplish-blue
Campanula wilkinsiana	Campanulaceae	Wilkin's Harebell	41.0256	-122.918	1883		Kidd basin, Siskiyou County, California		native	119	70	142	http://eol.org/data_objects/13149417		0.780093	0.507042	0.556863	280.833	51	56	18.0093	813			http://eol.org/schema/terms/purplish-blue
Cynoglossum grande	Boraginaceae	Pacific Hound's Tongue	42.4791	-122.913	633		Upper Table Rock trail, southern oregon, Oregon		native	121	144	249	http://eol.org/data_objects/13152261		0.636719	0.514056	0.976471	229.219	51	98	3.67188	887			http://eol.org/schema/terms/greenish-blue
Iris douglasiana	Iridaceae	Douglas Iris	38.0273	-122.889	5		Point Reyes National Seashore, Marin, US-CA		native	84	29	139	http://eol.org/data_objects/24050046		0.75	0.791367	0.545098	270	79	55	15	91			http://eol.org/schema/terms/purplish-blue
Nemophila heterophylla	Boraginaceae	Variable-leaf Baby-blue-eyes	38.6354	-122.862	118		Healdsburg Ridge, CA		native	182	183	201	http://eol.org/data_objects/23717913		0.657895	0.0945274	0.788235	236.842	9	79	5.78947	1000	Y		http://eol.org/schema/terms/greenish-blue
Cynoglossum grande	Boraginaceae	Pacific Hound's Tongue	38.6379	-122.861	102		Sonoma Coast OAEC California Naturalist, Sonoma, US-CA		native	120	168	251	http://eol.org/data_objects/21945311		0.605598	0.521912	0.984314	218.015	52	98	0.559796	97			http://eol.org/schema/terms/greenish-blue
Iris macrosiphon	Iridaceae	Bowltube Iris	39.6781	-122.808	1445		Mendocino National Forest, Mendocino County, California,		native	179	168	131	http://eol.org/data_objects/12517259		0.128472	0.268156	0.701961	46.25	27	70	-47.1528	734			http://purl.obolibrary.org/obo/PATO_0001944
Delphinium decorum	Ranunculaceae	Yellow-tinged Larkspur	39.084	-122.808	690		Lake County, California		native	86	81	129	http://eol.org/data_objects/12512773		0.684028	0.372093	0.505882	246.25	37	51	8.40278	689			http://eol.org/schema/terms/purplish-blue
Iris douglasiana	Iridaceae	Douglas Iris	38.0419	-122.79	125		Point Reyes National Seashore, beim Leuchtturm/next to the lighthouse, Marin County		native	134	116	179	http://eol.org/data_objects/13455112		0.714286	0.351955	0.701961	257.143	35	70	11.4286	594			http://eol.org/schema/terms/purplish-blue
Lupinus tidestromii	Fabaceae	Tidestrom Lupine	38.0419	-122.79	125		Point Reyes National Seashore, Marin County, California		native	110	79	94	http://eol.org/data_objects/12518955		0.919355	0.281818	0.431373	330.968	28	43	31.9355	595			http://eol.org/schema/terms/reddish-purple
Lupinus tidestromii	Fabaceae	Tidestrom Lupine	38.0419	-122.79	125		Point Reyes National Seashore, Marin County, California		native	91	71	73	http://eol.org/data_objects/12518956		0.983333	0.21978	0.356863	354	22	36	38.3333	596			http://eol.org/schema/terms/reddish-purple
Nemophila heterophylla	Boraginaceae	Variable-leaf Baby-blue-eyes	38.6121	-122.786	52		Alexander Valley, California		native	201	226	252	http://eol.org/data_objects/24049950		0.584967	0.202381	0.988235	210.588	20	99	-1.50327	96	Y		http://eol.org/schema/terms/greenish-blue
Iris macrosiphon	Iridaceae	Bowltube Iris	38.8867	-122.777	848		Boggs Lake Nature Preserve, Lake County		native	143	131	164	http://eol.org/data_objects/12517239		0.727273	0.20122	0.643137	261.818	20	64	12.7273	666			http://eol.org/schema/terms/purplish-blue
Collinsia sparsiflora	Plantaginaceae	Spinster's Blue Eyed Mary	38.8867	-122.777	848		Boggs Lake Preserve, Lake County, California,		native	176	145	173	http://eol.org/data_objects/12654339		0.849462	0.176136	0.690196	305.806	18	69	24.9462	665	Y		http://eol.org/schema/terms/reddish-purple
Collinsia sparsiflora var. arvensis	Plantaginaceae	Spinster's Blue Eyed Mary	38.9717	-122.769	1170		JEPS101630-southwest flank Mt. Konocti, ca. 4 miles E of Kelseyville, on Benson Ridge, in bottom of internally drained depression, Lake County, California		native	179	102	185	http://eol.org/data_objects/13151438		0.821285	0.448649	0.72549	295.663	45	73	22.1285	676	Y		http://eol.org/schema/terms/purplish-blue
Lupinus albifrons	Fabaceae	Silver Lupine	38.7296	-122.767	603		Mayacama Mountains, CA		native	132	94	213	http://eol.org/data_objects/21945881		0.719888	0.558685	0.835294	259.16	56	84	11.9888	100			http://eol.org/schema/terms/purplish-blue
Nemophila heterophylla	Boraginaceae	Variable-leaf Baby-blue-eyes	38.5259	-122.76	106		Shiloh Ridge Park, CA		native	186	186	198	http://eol.org/data_objects/21946875		0.666667	0.0606061	0.776471	240	6	78	6.66667	93	Y		http://purl.obolibrary.org/obo/PATO_0000318
Gilia capitata ssp. chamissonis	Polemoniaceae	Bluehead Gilia	37.9134	-122.728	50		Pt. Reyes, RCA Towers, Marin County, California		native	69	54	193	http://eol.org/data_objects/13156721		0.684652	0.720207	0.756863	246.475	72	76	8.46523	579	Y		http://eol.org/schema/terms/purplish-blue
Campanula californica	Campanulaceae	Swamp Harebell	37.9134	-122.728	50		Pt. Reyes, RCA Towers, Marin County, California, US		native	114	110	170	http://eol.org/data_objects/13149381		0.677778	0.352941	0.666667	244	35	67	7.77778	578			http://eol.org/schema/terms/purplish-blue
Lupinus polyphyllus	Fabaceae	Marsh Lupine	42.0807	-122.717	2283	x	Mt Ashland, Southern Oregon		native	127	93	199	http://eol.org/data_objects/13160092		0.720126	0.532663	0.780392	259.245	53	78	12.0126	849			http://eol.org/schema/terms/purplish-blue
Lupinus breweri var. breweri	Fabaceae	Mat Lupine	42.0807	-122.717	2283	x	Mount Ashland, Jackson, Oregon		native	78	84	130	http://eol.org/data_objects/17731772		0.647436	0.4	0.509804	233.077	40	51	4.74359	848			http://eol.org/schema/terms/greenish-blue
Campanula scouleri	Campanulaceae	Pale Bellflower	42.1465	-122.68	1066.8		Lambs mine trail Ashland, Jackson, Oregon		native	178	192	215	http://eol.org/data_objects/13149404	coordinates approximate	0.603604	0.172093	0.843137	217.297	17	84	0.36036	851			http://eol.org/schema/terms/greenish-blue
Campanula scouleri	Campanulaceae	Pale Bellflower	42.1465	-122.68	1066.8		Lambs mine trail Ashland, Jackson, Oregon		native	166	164	180	http://eol.org/data_objects/13149405		0.6875	0.0888889	0.705882	247.5	9	71	8.75	852			http://eol.org/schema/terms/purplish-blue
Iris douglasiana	Iridaceae	Douglas Iris	37.9236	-122.591	626		Marin Municipal Water District Watershed, mount tamalpais, Marin, US-CA		native	188	202	233	http://eol.org/data_objects/23717994		0.614815	0.193133	0.913725	221.333	19	91	1.48148	79			http://eol.org/schema/terms/greenish-blue
Campanula scouleri	Campanulaceae	Pale Bellflower	41.7743	-122.577	1113		Siskiyou County, California		native	167	174	214	http://eol.org/data_objects/13149406		0.641844	0.219626	0.839216	231.064	22	84	4.1844	839			http://eol.org/schema/terms/greenish-blue
Camassia quamash	Asparagaceae	Small Camas	47.2327	-122.535	102		Morse Wildlife Preserve		native	119	107	186	http://eol.org/data_objects/13508264		0.691983	0.424731	0.729412	249.114	42	73	9.19831	945			http://eol.org/schema/terms/purplish-blue
Brodiaea coronaria ssp. rosea	Asparagaceae	Crown Brodiaea	39.1863	-122.521	594		Stove Glade, ca 1 mile N of N end Indian Valley Res, Lake County, California, US		native	203	192	221	http://eol.org/data_objects/13148460		0.729885	0.131222	0.866667	262.759	13	87	12.9885	705			http://eol.org/schema/terms/purplish-blue
Campanula scouleri	Campanulaceae	Pale Bellflower	45.7466	-122.519	123		Clark County, Washington		native	213	209	217	http://eol.org/data_objects/13257954		0.75	0.0368664	0.85098	270	4	85	15	941			http://eol.org/schema/terms/purplish-blue
Phacelia californica	Plantaginaceae	California Phacelia	37.7805	-122.513	17		Lands End, Golden Gate Natl. Rec. Area - SF, San Francisco, Golden Gate National Recreation Area, US-CA		native	220	141	212	http://eol.org/data_objects/21942940		0.850211	0.359091	0.862745	306.076	36	86	25.0211	57			http://eol.org/schema/terms/reddish-purple
Phacelia californica	Plantaginaceae	California Phacelia	37.786	-122.508	13		Seal Rocks Beach, San Francisco, California		native	162	102	189	http://eol.org/data_objects/24624017		0.781609	0.460317	0.741176	281.379	46	74	18.1609	521			http://eol.org/schema/terms/purplish-blue
Cynoglossum grande	Boraginaceae	Pacific Hound's Tongue	37.8262	-122.5	225		Golden Gate National Recreation Area, Marin Headlands, Marin County, California,		native	80	94	139	http://eol.org/data_objects/12512503		0.627119	0.42446	0.545098	225.763	42	55	2.71186	527			http://eol.org/schema/terms/greenish-blue
Iris macrosiphon	Iridaceae	Bowltube Iris	39.0979	-122.489	1086		Walker Ridge, Colusa County, California		native	149	124	183	http://eol.org/data_objects/12517244		0.737288	0.322404	0.717647	265.424	32	72	13.7288	694			http://eol.org/schema/terms/purplish-blue
Cynoglossum grande	Boraginaceae	Pacific Hound's Tongue	38.6504	-122.479	350		Etna Springs Road, Napa County, California		native	151	119	152	http://eol.org/data_objects/12512504		0.828283	0.217105	0.596078	298.182	22	60	22.8283	646			http://eol.org/schema/terms/purplish-blue
Campanula scabrella	Campanulaceae	Rough Bellflower	41.3199	-122.479	2731	x	Mt. Eddy, Siskiyou/Trinity County, California		native	168	147	219	http://eol.org/data_objects/22426348		0.715278	0.328767	0.858824	257.5	33	86	11.5278	820			http://eol.org/schema/terms/purplish-blue
Iris douglasiana	Iridaceae	Douglas Iris	37.8077	-122.478	18		San Francisco, Golden Gate National Recreation Area		native	172	159	240	http://eol.org/data_objects/25273912		0.693416	0.3375	0.941176	249.63	34	94	9.34156	59			http://eol.org/schema/terms/purplish-blue
Phacelia californica	Plantaginaceae	California Phacelia	37.6367	-122.476	210		Milagra Ridge, Pacifica, California		native	202	164	199	http://eol.org/data_objects/24840101		0.846491	0.188119	0.792157	304.737	19	79	24.6491	53			http://eol.org/schema/terms/reddish-purple
Phacelia californica	Plantaginaceae	California Phacelia	37.7552	-122.448	249		Twin Peaks, San Francisco County, California		native	212	182	213	http://eol.org/data_objects/12522404		0.827957	0.14554	0.835294	298.065	15	84	22.7957	520			http://eol.org/schema/terms/purplish-blue
Phacelia californica	Plantaginaceae	California Phacelia	37.7531	-122.447	272		Twin Peaks Park, San Francisco, US-CA		native	178	151	212	http://eol.org/data_objects/24623829		0.740437	0.287736	0.831373	266.557	29	83	14.0437	56			http://eol.org/schema/terms/purplish-blue
Phacelia californica	Plantaginaceae	California Phacelia	37.6934	-122.439	279		San Bruno Mountain County Park, San Mateo, US-CA		native	151	123	161	http://eol.org/data_objects/21944272		0.789474	0.236025	0.631373	284.211	24	63	18.9474	54			http://eol.org/schema/terms/purplish-blue
Iris douglasiana	Iridaceae	Douglas Iris	37.8609	-122.433	182		Angel Island State Park, CA		native	177	175	206	http://eol.org/data_objects/22991872		0.677419	0.150485	0.807843	243.871	15	81	7.74194	65			http://eol.org/schema/terms/purplish-blue
Phacelia californica	Plantaginaceae	California Phacelia	37.6547	-122.408	7		South San Francisco, California		native	209	175	224	http://eol.org/data_objects/24625924		0.782313	0.21875	0.878431	281.633	22	88	18.2313	488			http://eol.org/schema/terms/purplish-blue
Phacelia californica	Plantaginaceae	California Phacelia	37.2552	-122.383	9		Pescadero, San Mateo County, California		native	98	88	109	http://eol.org/data_objects/12522403		0.746032	0.192661	0.427451	268.571	19	43	14.6032	461			http://eol.org/schema/terms/purplish-blue
Cynoglossum grande	Boraginaceae	Pacific Hound's Tongue	39.0536	-122.361	430		Payne Ranch, Colusa County, California		native	75	39	131	http://eol.org/data_objects/13152268		0.731884	0.70229	0.513725	263.478	70	51	13.1884	684			http://eol.org/schema/terms/purplish-blue
Lupinus succulentus	Fabaceae	Succulent Annual Lupine	39.0536	-122.361	430		Payne Ranch, Colusa County, California		native	145	83	172	http://eol.org/data_objects/13160114		0.782772	0.517442	0.67451	281.798	52	67	18.2772	685			http://eol.org/schema/terms/purplish-blue
Campanula shetleri	Campanulaceae	Castle Campanula	41.1749	-122.327	1444		along trail to Castle Dome of Castle Crags, CA		native	147	131	88	http://eol.org/data_objects/22375095		0.121469	0.401361	0.576471	43.7288	40	58	-47.8531	817			http://purl.obolibrary.org/obo/PATO_0001944
Lupinus albifrons	Fabaceae	Silver Lupine	37.9237	-122.301	155		El Cerrito Hillside Natural Area, Contra Costa, US-CA		native	179	146	224	http://eol.org/data_objects/21944021		0.737179	0.348214	0.878431	265.385	35	88	13.7179	80			http://eol.org/schema/terms/purplish-blue
Veronica persica	Plantaginaceae	Birdeye Speedwell	37.4737	-122.279	70		Edgewood County Park, San Mateo, CA		native	76	109	157	http://eol.org/data_objects/24048540		0.598765	0.515924	0.615686	215.556	52	62	-0.123457	475			http://eol.org/schema/terms/greenish-blue
Collinsia sparsiflora	Plantaginaceae	Spinster's Blue Eyed Mary	38.5025	-122.265	291		Napa County, California		native	231	192	214	http://eol.org/data_objects/13259191		0.905983	0.168831	0.905882	326.154	17	91	30.5983	636	Y		http://eol.org/schema/terms/reddish-purple
Ceanothus integerrimus	Rhamnaceae	California Lilac	40.8665	-122.254	505		Hirz Bay Area, Shasta County, California		native	151	155	161	http://eol.org/data_objects/13258340		0.6	0.0621118	0.631373	216	6	63	0	806			http://eol.org/schema/terms/greenish-blue
Trichostema parishii	Lamiaceae	Parish's Bluecurls	37.896	-122.252	252		California, Berkeley, Tilden Park		cultivated	98	83	147	http://eol.org/data_objects/22857705		0.705729	0.435374	0.576471	254.062	44	58	10.5729	569	Y		http://eol.org/schema/terms/purplish-blue
Trichostema parishii	Lamiaceae	Parish's Bluecurls	37.896	-122.252	252		California, Berkeley, Tilden Park		cultivated	146	123	195	http://eol.org/data_objects/22857703		0.719907	0.369231	0.764706	259.167	37	76	11.9907	567	Y		http://eol.org/schema/terms/purplish-blue
Trichostema parishii	Lamiaceae	Parish's Bluecurls	37.896	-122.252	252		California, Berkeley, Tilden Park		cultivated	93	56	138	http://eol.org/data_objects/22857704		0.74187	0.594203	0.541176	267.073	59	54	14.187	568	Y		http://eol.org/schema/terms/purplish-blue
Lupinus albifrons	Fabaceae	Silver Lupine	37.0711	-122.251	142		Bonny Doon Ecological Reserve, Santa Cruz County, California		native	103	38	115	http://eol.org/data_objects/17747917		0.807359	0.669565	0.45098	290.649	67	45	20.7359	440			http://eol.org/schema/terms/purplish-blue
Lupinus succulentus	Fabaceae	Succulent Annual Lupine	37.8657	-122.243	230		Stonewall-Panoramic Trail Berkeley, ca		native	111	77	138	http://eol.org/data_objects/24170277		0.759563	0.442029	0.541176	273.443	44	54	15.9563	66			http://eol.org/schema/terms/purplish-blue
Lupinus succulentus	Fabaceae	Succulent Annual Lupine	37.8493	-122.24	98		CA-24 E, Oakland, California		native	106	68	175	http://eol.org/data_objects/21945716		0.725857	0.611429	0.686275	261.308	61	69	12.5857	64			http://eol.org/schema/terms/purplish-blue
Phacelia californica	Plantaginaceae	California Phacelia	37.882	-122.224	488		Tilden Regional Park, California		native	182	159	187	http://eol.org/data_objects/21937515		0.803571	0.149733	0.733333	289.286	15	73	20.3571	70			http://eol.org/schema/terms/purplish-blue
Phacelia californica	Plantaginaceae	California Phacelia	37.882	-122.224	488		Tilden Regional Park, California		native	187	175	186	http://eol.org/data_objects/21937516		0.847222	0.0641711	0.733333	305	6	73	24.7222	69			http://eol.org/schema/terms/reddish-purple
Nemophila menziesii	Boraginaceae	Menzies' Baby-blue-eyes	37.8875	-122.224	517		Seaview Trl, Orinda, California		native	112	145	172	http://eol.org/data_objects/23848184		0.575	0.348837	0.67451	207	35	67	-2.5	71	Y		http://eol.org/schema/terms/greenish-blue
Gilia clivorum	Polemoniaceae	Purplespot Gilia	37.4044	-122.223	191		Jasper Ridge Biological Preserve, San Mateo, US-CA		native	237	192	244	http://eol.org/data_objects/21938614		0.810897	0.213115	0.956863	291.923	21	96	21.0897	48		Y	http://eol.org/schema/terms/purplish-blue
Polemonium pulcherrimum	Polemoniaceae	Showy Jacob's-ladder	41.3888	-122.21	3185	x	Helen Lake, Mt. Shasta, Siskiyou County, California		native	147	122	141	http://eol.org/data_objects/22426635		0.873333	0.170068	0.576471	314.4	17	58	27.3333	821			http://eol.org/schema/terms/reddish-purple
Lupinus albifrons	Fabaceae	Silver Lupine	37.1474	-122.195	754		Eagle Rock, Santa Cruz County, California		native	204	138	170	http://eol.org/data_objects/12518764		0.919192	0.323529	0.8	330.909	32	80	31.9192	443			http://eol.org/schema/terms/reddish-purple
Campanula wilkinsiana	Campanulaceae	Wilkin's Harebell	41.4094	-122.194	4264	x	Mt. Shasta, Avalanche Gulch, Siskiyou County, California		native	89	78	149	http://eol.org/data_objects/22426351		0.692488	0.47651	0.584314	249.296	48	58	9.24883	824			http://eol.org/schema/terms/purplish-blue
Campanula wilkinsiana	Campanulaceae	Wilkin's Harebell	41.4094	-122.194	4264	x	Mt. Shasta, Avalanche Gulch, Siskiyou County, California		native	81	71	133	http://eol.org/data_objects/22426350		0.693548	0.466165	0.521569	249.677	47	52	9.35484	823			http://eol.org/schema/terms/purplish-blue
Campanula wilkinsiana	Campanulaceae	Wilkin's Harebell	41.4094	-122.194	4264	x	Mt. Shasta, Avalanche Gulch, Siskiyou County, California		native	131	115	183	http://eol.org/data_objects/22426349		0.705882	0.371585	0.717647	254.118	37	72	10.5882	822			http://eol.org/schema/terms/purplish-blue
Cynoglossum grande	Boraginaceae	Pacific Hound's Tongue	37.3143	-122.193	646		Skyline Ridge Open Space Preserve, San Mateo, US-CA		native	99	125	205	http://eol.org/data_objects/24050351		0.625786	0.517073	0.803922	225.283	52	80	2.57862	46			http://eol.org/schema/terms/greenish-blue
Cynoglossum grande	Boraginaceae	Pacific Hound's Tongue	37.84	-122.186	333		Huckleberry Botanic Regional Preserve, Contra Costa, US-CA		native	8	51	214	http://eol.org/data_objects/21938365		0.631877	0.962617	0.839216	227.476	96	84	3.1877	63			http://eol.org/schema/terms/greenish-blue
Penstemon cinicola	Plantaginaceae	Ash Beardtongue	42.8689	-122.168	1956	x	Crater Lake National Park, Oregon		native	128	122	183	http://eol.org/data_objects/13162906		0.68306	0.333333	0.717647	245.902	33	72	8.30601	902			http://eol.org/schema/terms/purplish-blue
Penstemon cinicola	Plantaginaceae	Ash Beardtongue	42.8689	-122.168	1956	x	Crater Lake National Park, Oregon		native	134	126	193	http://eol.org/data_objects/13162905		0.686567	0.34715	0.756863	247.164	35	76	8.65672	901			http://eol.org/schema/terms/purplish-blue
Penstemon cinicola	Plantaginaceae	Ash Beardtongue	42.8689	-122.168	1956	x	Crater Lake National Park, Oregon		native	213	199	252	http://eol.org/data_objects/13162903		0.710692	0.210317	0.988235	255.849	21	99	11.0692	899			http://eol.org/schema/terms/purplish-blue
Penstemon cinicola	Plantaginaceae	Ash Beardtongue	42.8689	-122.168	1956	x	Crater Lake National Park, Oregon		native	180	159	222	http://eol.org/data_objects/13162904		0.722222	0.283784	0.870588	260	28	87	12.2222	900			http://eol.org/schema/terms/purplish-blue
Penstemon cinicola	Plantaginaceae	Ash Beardtongue	42.8689	-122.168	1956	x	Crater Lake National Park, Oregon		native	174	140	223	http://eol.org/data_objects/13162902		0.73494	0.372197	0.87451	264.578	37	87	13.494	898			http://eol.org/schema/terms/purplish-blue
Polemonium californicum	Polemoniaceae	California Polemonium	42.8689	-122.168	1956	x	Crater Lake National Park, Oregon		native	114	96	113	http://eol.org/data_objects/13164625		0.842593	0.157895	0.447059	303.333	16	45	24.2593	903			http://eol.org/schema/terms/reddish-purple
Leptosiphon harknessii	Polemoniaceae	Harkness' Flaxflower	42.8689	-122.168	1956	x	Crater Lake National Park, Oregon		native	241	241	237	http://eol.org/data_objects/13159076		0.166667	0.0165975	0.945098	60	2	95	-43.3333	896			http://purl.obolibrary.org/obo/PATO_0000324
Leptosiphon harknessii	Polemoniaceae	Harkness' Flaxflower	42.8689	-122.168	1956	x	Crater Lake National Park, Oregon		native	233	222	223	http://eol.org/data_objects/13159078		0.984848	0.0472103	0.913725	354.545	5	91	38.4848	897			http://eol.org/schema/terms/reddish-purple
Sisyrinchium idahoense	Iridaceae	Idaho Blue-eyed-grass	42.8689	-122.168	1956	x	Crater Lake National Park, Oregon		native	128	111	183	http://eol.org/data_objects/13167969		0.706019	0.393443	0.717647	254.167	39	72	10.6019	907	Y		http://eol.org/schema/terms/purplish-blue
Sisyrinchium idahoense	Iridaceae	Idaho Blue-eyed-grass	42.8689	-122.168	1956	x	Crater Lake National Park, Oregon		native	123	92	164	http://eol.org/data_objects/13167968		0.738426	0.439024	0.643137	265.833	44	64	13.8426	906	Y		http://eol.org/schema/terms/purplish-blue
Sisyrinchium idahoense	Iridaceae	Idaho Blue-eyed-grass	42.8689	-122.168	1956	x	Crater Lake National Park, Oregon		native	148	109	194	http://eol.org/data_objects/13167967		0.743137	0.438144	0.760784	267.529	44	76	14.3137	905	Y		http://eol.org/schema/terms/purplish-blue
Hackelia micrantha	Boraginaceae	Jessica Sticktight	42.8689	-122.168	1956	x	Crater Lake National Park, Oregon		native	197	223	250	http://eol.org/data_objects/13157126		0.584906	0.212	0.980392	210.566	21	98	-1.50943	894			http://eol.org/schema/terms/greenish-blue
Hackelia micrantha	Boraginaceae	Jessica Sticktight	42.8689	-122.168	1956	x	Crater Lake National Park, Oregon		native	135	162	209	http://eol.org/data_objects/13157128		0.605856	0.354067	0.819608	218.108	35	82	0.585586	892			http://eol.org/schema/terms/greenish-blue
Hackelia micrantha	Boraginaceae	Jessica Sticktight	42.8689	-122.168	1956	x	Crater Lake National Park, Oregon		native	131	157	207	http://eol.org/data_objects/13157127		0.609649	0.36715	0.811765	219.474	37	81	0.964912	895			http://eol.org/schema/terms/greenish-blue
Hackelia micrantha	Boraginaceae	Jessica Sticktight	42.8689	-122.168	1956	x	Crater Lake National Park, Oregon		native	172	186	224	http://eol.org/data_objects/13157121		0.621795	0.232143	0.878431	223.846	23	88	2.17949	893			http://eol.org/schema/terms/greenish-blue
Polemonium pulcherrimum	Polemoniaceae	Showy Jacob's-ladder	42.8689	-122.168	1956	x	Crater Lake National Park, Oregon		native	162	148	167	http://eol.org/data_objects/13164654		0.789474	0.113772	0.654902	284.211	11	65	18.9474	904			http://eol.org/schema/terms/purplish-blue
Iris douglasiana	Iridaceae	Douglas Iris	37.1099	-122.148	780		Santa Cruz, US-CA		native	206	195	203	http://eol.org/data_objects/24050732		0.878788	0.0533981	0.807843	316.364	5	81	27.8788	44			http://eol.org/schema/terms/reddish-purple
Lupinus succulentus	Fabaceae	Succulent Annual Lupine	37.7526	-122.136	193		Knowland Park, CA		native	123	110	182	http://eol.org/data_objects/24234583		0.696759	0.395604	0.713725	250.833	40	71	9.67593	55			http://eol.org/schema/terms/purplish-blue
Iris douglasiana	Iridaceae	Douglas Iris	37.2845	-122.083	273		Picchetti Ranch Open Space Preserve		native	231	224	221	http://eol.org/data_objects/24051138		0.05	0.04329	0.905882	18	4	91	-55	45			http://eol.org/schema/terms/orangish-red
Veronica persica	Plantaginaceae	Birdeye Speedwell	37.4802	-122.044	2		Don Edwards San Francisco Bay National Wildlife Refuge		native	168	165	215	http://eol.org/data_objects/24049578		0.676667	0.232558	0.843137	243.6	23	84	7.66667	476			http://eol.org/schema/terms/purplish-blue
Nemophila heterophylla	Boraginaceae	Variable-leaf Baby-blue-eyes	37.916	-121.953	319		500–501 Kaiser Quarry Rd, Clayton, California		native	234	251	250	http://eol.org/data_objects/23717921		0.490196	0.0677291	0.984314	176.471	7	98	-10.9804	74	Y		http://eol.org/schema/terms/greenish-blue
Delphinium patens	Ranunculaceae	Spreading Larkspur	37.9153	-121.948	205		Mount Diablo State Park, Contra Costa, US-CA		native	53	36	117	http://eol.org/data_objects/21947170		0.701646	0.692308	0.458824	252.593	69	46	10.1646	73			http://eol.org/schema/terms/purplish-blue
Gilia clivorum	Polemoniaceae	Purplespot Gilia	37.9162	-121.947	211		Mount Diablo State Park, Contra Costa County, CA		native	116	107	168	http://eol.org/data_objects/21945795		0.691257	0.363095	0.658824	248.852	36	66	9.12568	75		Y	http://eol.org/schema/terms/purplish-blue
Lupinus tidestromii	Fabaceae	Tidestrom Lupine	36.6037	-121.945	40		Seventeen Mile Drive, Monterey County, California		native	126	105	104	http://eol.org/data_objects/12518954		0.00757576	0.174603	0.494118	2.72727	17	49	-59.2424	430			http://eol.org/schema/terms/orangish-red
Lupinus tidestromii	Fabaceae	Tidestrom Lupine	36.6037	-121.945	40		Seventeen Mile Drive, Monterey County, California		native	64	53	54	http://eol.org/data_objects/12518953		0.984848	0.171875	0.25098	354.545	17	25	38.4848	429			http://eol.org/schema/terms/reddish-purple
Nemophila heterophylla	Boraginaceae	Variable-leaf Baby-blue-eyes	37.9183	-121.944	192		Mitchell Canyon Creek, Clayton, California		native	234	246	242	http://eol.org/data_objects/25273888		0.444444	0.0487805	0.964706	160	5	96	-15.5556	77	Y		http://eol.org/schema/terms/greenish-blue
Gilia clivorum	Polemoniaceae	Purplespot Gilia	37.9206	-121.941	180		Mt. Diablo State Park, Mitchell Canyon trail, Contra Costa County, California		native	210	177	239	http://eol.org/data_objects/13156731		0.755376	0.259414	0.937255	271.935	26	94	15.5376	581		Y	http://eol.org/schema/terms/purplish-blue
Lupinus albifrons	Fabaceae	Silver Lupine	37.9206	-121.941	180		Mitchell Canyon, Mt. Diablo State Park		native	98	50	130	http://eol.org/data_objects/10072923		0.766667	0.615385	0.509804	276	62	51	16.6667	582			http://eol.org/schema/terms/purplish-blue
Iris douglasiana	Iridaceae	Douglas Iris	36.5115	-121.941	12		Point Lobos State Reserve, Monterey, US-CA		native	135	132	213	http://eol.org/data_objects/23848667		0.67284	0.380282	0.835294	242.222	38	84	7.28395	41			http://eol.org/schema/terms/purplish-blue
Gilia clivorum	Polemoniaceae	Purplespot Gilia	36.4811	-121.937	74		Malpaso Canyon, Monterey County, California		native	210	177	191	http://eol.org/data_objects/12515953		0.929293	0.157143	0.823529	334.545	16	82	32.9293	418		Y	http://eol.org/schema/terms/reddish-purple
Lupinus succulentus	Fabaceae	Succulent Annual Lupine	37.9222	-121.927	164		Mount Diablo state park		native	143	65	156	http://eol.org/data_objects/22495302		0.809524	0.583333	0.611765	291.429	58	61	20.9524	78			http://eol.org/schema/terms/purplish-blue
Navarretia pubescens	Polemoniaceae	Downy Navarretia	37.9224	-121.926	172		Donner Canyon, Mt. Diablo, Contra Costa County, California,		native	157	146	182	http://eol.org/data_objects/12520504		0.717593	0.197802	0.713725	258.333	20	71	11.7593	583			http://eol.org/schema/terms/purplish-blue
Iris missouriensis	Iridaceae	Rocky Mountain Iris	36.5552	-121.923	73		Carmel, Monterey County, California		native	208	169	188	http://eol.org/data_objects/12517265		0.918803	0.1875	0.815686	330.769	19	82	31.8803	426			http://eol.org/schema/terms/reddish-purple
Nemophila heterophylla	Boraginaceae	Variable-leaf Baby-blue-eyes	37.9175	-121.923	188		Mount Diablo State Park, CA		native	185	187	190	http://eol.org/data_objects/23718934		0.6	0.0263158	0.745098	216	3	75	0	76	Y		http://eol.org/schema/terms/greenish-blue
Cynoglossum grande	Boraginaceae	Pacific Hound's Tongue	37.8989	-121.918	475		Mount Diablo State Park, Contra Costa, US-CA		native	72	90	180	http://eol.org/data_objects/23366539		0.638889	0.6	0.705882	230	60	71	3.88889	72			http://eol.org/schema/terms/greenish-blue
Salvia columbariae	Lamiaceae	California Sage	37.8801	-121.915	1091		Mount Diablo State Park, Contra Costa County, CA		native	86	126	250	http://eol.org/data_objects/24233936		0.626016	0.656	0.980392	225.366	66	98	2.60163	67			http://eol.org/schema/terms/greenish-blue
Phacelia breweri	Plantaginaceae	Brewer's Scorpionweed	37.8818	-121.913	1112		Mitchel Canyon Fire Rd, Clayton, CA 94517		native	192	187	229	http://eol.org/data_objects/21938775		0.686508	0.183406	0.898039	247.143	18	90	8.65079	560			http://eol.org/schema/terms/purplish-blue
Phacelia breweri	Plantaginaceae	Brewer's Scorpionweed	37.8818	-121.913	1112		Mount Diablo State Park, Contra Costa County, CA		native	159	145	220	http://eol.org/data_objects/21946222		0.697778	0.340909	0.862745	251.2	34	86	9.77778	563			http://eol.org/schema/terms/purplish-blue
Phacelia breweri	Plantaginaceae	Brewer's Scorpionweed	37.8818	-121.913	1112		Mount Diablo State Park, Contra Costa County, CA		native	147	128	216	http://eol.org/data_objects/21946220		0.702652	0.407407	0.847059	252.955	41	85	10.2652	561			http://eol.org/schema/terms/purplish-blue
Phacelia breweri	Plantaginaceae	Brewer's Scorpionweed	37.8818	-121.913	1112		Mount Diablo State Park, Contra Costa County, CA		native	141	120	212	http://eol.org/data_objects/21946221		0.70471	0.433962	0.831373	253.696	43	83	10.471	562			http://eol.org/schema/terms/purplish-blue
Collinsia sparsiflora	Plantaginaceae	Spinster's Blue Eyed Mary	37.8818	-121.913	1112		Mount Diablo State Park, Contra Costa County, CA		native	132	87	171	http://eol.org/data_objects/21946224		0.755952	0.491228	0.670588	272.143	49	67	15.5952	559	Y		http://eol.org/schema/terms/purplish-blue
Nemophila heterophylla	Boraginaceae	Variable-leaf Baby-blue-eyes	37.8818	-121.909	992		Mount Diablo State Park, Contra Costa County, CA		native	218	228	241	http://eol.org/data_objects/21946230		0.594203	0.0954357	0.945098	213.913	10	95	-0.57971	68	Y		http://eol.org/schema/terms/greenish-blue
Ipomoea purpurea	Convolvulaceae	Common Morning Glory	36.9772	-121.899	25		Aptos, CA, Santa Cruz County, California		introduced	85	45	168	http://eol.org/data_objects/20835582		0.720867	0.732143	0.658824	259.512	73	66	12.0867	438			http://eol.org/schema/terms/purplish-blue
Triodanis perfoliata subsp. biflora	Campanulaceae	Claspingleaf Venus'-looking-glass	36.9772	-121.899	25		Aptos, Santa Cruz County, California		native	196	152	201	http://eol.org/data_objects/13169677		0.816327	0.243781	0.788235	293.878	24	79	21.6327	439			http://eol.org/schema/terms/purplish-blue
Lupinus albifrons	Fabaceae	Silver Lupine	36.601	-121.887	2		Beach above Montery, Monterey County, California		native	220	143	207	http://eol.org/data_objects/13159897	approximate	0.861472	0.35	0.862745	310.13	35	86	26.1472	428			http://eol.org/schema/terms/reddish-purple
Downingia pusilla	Campanulaceae	Dwarf Calicoflower	38.259	-121.849	10		Jepson Prairie, 2 miles SW of Olcutt;, Solano County, California		native	247	247	246	http://eol.org/data_objects/13153619		0.166667	0.00404858	0.968627	60	0	97	-43.3333	603			http://purl.obolibrary.org/obo/PATO_0000324
Downingia pusilla	Campanulaceae	Dwarf Calicoflower	38.259	-121.849	10		Vernal pool, periphery of Olcott Lake, Jepson Prairie, Solano County, California		native	162	162	149	http://eol.org/data_objects/13153621		0.166667	0.0802469	0.635294	60	8	64	-43.3333	605			http://purl.obolibrary.org/obo/PATO_0000324
Downingia pusilla	Campanulaceae	Dwarf Calicoflower	38.259	-121.849	10		Vernal pool, periphery of Olcott Lake, Jepson Prairie, Solano County, California		native	184	189	176	http://eol.org/data_objects/13153620		0.230769	0.0687831	0.741176	83.0769	7	74	-36.9231	604			http://purl.obolibrary.org/obo/PATO_0001941
Downingia pusilla	Campanulaceae	Dwarf Calicoflower	38.259	-121.849	10		Vernal pool, periphery of Olcott Lake, Jepson Prairie, Solano County, California		native	182	184	180	http://eol.org/data_objects/13153622		0.25	0.0217391	0.721569	90	2	72	-35	606			http://purl.obolibrary.org/obo/PATO_0001941
Downingia pusilla	Campanulaceae	Dwarf Calicoflower	38.259	-121.849	10		Vernal pool, periphery of Olcott Lake, Jepson Prairie, Solano County, California		native	188	191	185	http://eol.org/data_objects/13153623		0.25	0.0314136	0.74902	90	3	75	-35	607			http://purl.obolibrary.org/obo/PATO_0001941
Lupinus succulentus	Fabaceae	Succulent Annual Lupine	37.5159	-121.83	125		Sunol Regional Wilderness		native	107	108	192	http://eol.org/data_objects/24169995		0.664706	0.442708	0.752941	239.294	44	75	6.47059	50			http://eol.org/schema/terms/greenish-blue
Lupinus succulentus	Fabaceae	Succulent Annual Lupine	37.5159	-121.83	125		Sunol Regional Wilderness		native	109	86	159	http://eol.org/data_objects/24169994		0.719178	0.459119	0.623529	258.904	46	62	11.9178	49			http://eol.org/schema/terms/purplish-blue
Brodiaea coronaria	Asparagaceae	Crown Brodiaea	38.4455	-121.823	19		Dixon, CA		native	169	141	224	http://eol.org/data_objects/24050801		0.722892	0.370536	0.878431	260.241	37	88	12.2892	633			http://eol.org/schema/terms/purplish-blue
Downingia pusilla	Campanulaceae	Dwarf Calicoflower	38.4455	-121.823	19		Dixon CA		native	230	244	243	http://eol.org/data_objects/24050803		0.488095	0.057377	0.956863	175.714	6	96	-11.1905	635			http://eol.org/schema/terms/greenish-blue
Downingia pusilla	Campanulaceae	Dwarf Calicoflower	38.4455	-121.823	19		Dixon CA		native	200	210	225	http://eol.org/data_objects/24050752		0.6	0.111111	0.882353	216	11	88	0	634			http://eol.org/schema/terms/greenish-blue
Lupinus albifrons	Fabaceae	Silver Lupine	37.9984	-121.797	13		Antioch dunes, Contra Costa County, California,		native	119	108	135	http://eol.org/data_objects/12518759		0.734568	0.2	0.529412	264.444	20	53	13.4568	589			http://eol.org/schema/terms/purplish-blue
Gilia clivorum	Polemoniaceae	Purplespot Gilia	37.8154	-121.778	613		Los Vaqueros, Contra Costa County, CA		native	214	202	242	http://eol.org/data_objects/23422394		0.716667	0.165289	0.94902	258	17	95	11.6667	62		Y	http://eol.org/schema/terms/purplish-blue
Gilia clivorum	Polemoniaceae	Purplespot Gilia	37.8154	-121.778	613		Los Vaqueros, Contra Costa County, CA		native	199	177	244	http://eol.org/data_objects/23422395		0.721393	0.27459	0.956863	259.701	27	96	12.1393	61		Y	http://eol.org/schema/terms/purplish-blue
Nemophila heterophylla	Boraginaceae	Variable-leaf Baby-blue-eyes	37.8024	-121.764	394		Los Vaqueros, Contra Costa County, CA		native	240	242	237	http://eol.org/data_objects/23569730		0.233333	0.0206612	0.94902	84	2	95	-36.6667	58	Y		http://purl.obolibrary.org/obo/PATO_0001941
Polemonium californicum	Polemoniaceae	California Polemonium	46.7892	-121.736	1713		Mount Rainer		native	73	85	161	http://eol.org/data_objects/22427728		0.643939	0.546584	0.631373	231.818	55	63	4.39394	166			http://eol.org/schema/terms/greenish-blue
Campanula exigua	Campanulaceae	Chaparral Bellflower	37.6017	-121.72	236		Alameda County, California		native	144	104	167	http://eol.org/data_objects/12509769		0.772487	0.377246	0.654902	278.095	38	65	17.2487	484			http://eol.org/schema/terms/purplish-blue
Nemophila menziesii	Boraginaceae	Menzies' Baby-blue-eyes	36.2969	-121.715	1376		Ventana Double Cones trail, Monterey County, California		native	117	172	238	http://eol.org/data_objects/20835695		0.590909	0.508403	0.933333	212.727	51	93	-0.909091	396	Y		http://eol.org/schema/terms/greenish-blue
Nemophila menziesii	Boraginaceae	Menzies' Baby-blue-eyes	37.3351	-121.713	459		Joseph Grant County Park		native	158	197	247	http://eol.org/data_objects/22859600		0.593633	0.360324	0.968627	213.708	36	97	-0.636704	47	Y		http://eol.org/schema/terms/greenish-blue
Veronica cusickii	Plantaginaceae	Cusick's Speedwell	46.8606	-121.704	2604	x	Mt. Rainier National Park, Washington		native	92	93	169	http://eol.org/data_objects/13270870		0.664502	0.455621	0.662745	239.221	46	66	6.45022	944			http://eol.org/schema/terms/greenish-blue
Polemonium pulcherrimum	Polemoniaceae	Showy Jacob's-ladder	46.8606	-121.704	2604	x	Mt. Rainier National Park, Washington		native	171	175	225	http://eol.org/data_objects/13267604		0.654321	0.24	0.882353	235.556	24	88	5.4321	943			http://eol.org/schema/terms/greenish-blue
Iris macrosiphon	Iridaceae	Bowltube Iris	37.3282	-121.69	609.6		San Felipe ranch, open fields top of Oat Hill, 2000', Santa Clara County, California		native	81	65	130	http://eol.org/data_objects/12517240	approximate	0.707692	0.5	0.509804	254.769	50	51	10.7692	464			http://eol.org/schema/terms/purplish-blue
Lupinus albifrons	Fabaceae	Silver Lupine	37.3424	-121.653	1066.8		San Felipe ranch, Bollinger ridge, above cabin, 3500', Santa Clara County, California		native	124	52	134	http://eol.org/data_objects/12518761	approximate	0.813008	0.61194	0.52549	292.683	61	53	21.3008	467			http://eol.org/schema/terms/purplish-blue
Phacelia breweri	Plantaginaceae	Brewer's Scorpionweed	37.3419	-121.643	1280		Mount Hamilton, Santa Clara County, California		native	90	89	99	http://eol.org/data_objects/12522401		0.683333	0.10101	0.388235	246	10	39	8.33333	466			http://eol.org/schema/terms/purplish-blue
Campanula exigua	Campanulaceae	Chaparral Bellflower	37.3419	-121.643	1280		Summit of Mount Hamilton., Stanislaus, California,		native	105	33	9	http://eol.org/data_objects/24599310		0.0416667	0.914286	0.411765	15	91	41	-55.8333	465			http://eol.org/schema/terms/orangish-red
Lupinus obtusilobus	Fabaceae	Blunt-lobe Lupine	40.3464	-121.614	1477		Lassen Volcanic National Park, Shasta County, California		native	107	65	125	http://eol.org/data_objects/13264737		0.783333	0.48	0.490196	282	48	49	18.3333	771			http://eol.org/schema/terms/purplish-blue
Lupinus obtusilobus	Fabaceae	Blunt-lobe Lupine	40.3464	-121.614	1477		Lassen Volcanic National Park, Shasta County, California		native	147	104	160	http://eol.org/data_objects/13264738		0.794643	0.35	0.627451	286.071	35	63	19.4643	772			http://eol.org/schema/terms/purplish-blue
Lupinus obtusilobus	Fabaceae	Blunt-lobe Lupine	40.3464	-121.614	1477		Lassen Volcanic National Park, Shasta County, California		native	105	92	107	http://eol.org/data_objects/12518892		0.811111	0.140187	0.419608	292	14	42	21.1111	773			http://eol.org/schema/terms/purplish-blue
Polemonium californicum	Polemoniaceae	California Polemonium	40.3464	-121.614	1477		Lassen Volcanic National Park, Shasta County, California		native	86	90	111	http://eol.org/data_objects/12523789		0.64	0.225225	0.435294	230.4	23	44	4	774			http://eol.org/schema/terms/greenish-blue
Polemonium pulcherrimum	Polemoniaceae	Showy Jacob's-ladder	40.3464	-121.614	1477		Lassen Volcanic National Park, Shasta County, California		native	135	126	127	http://eol.org/data_objects/12523798		0.981481	0.0666667	0.529412	353.333	7	53	38.1481	775			http://eol.org/schema/terms/reddish-purple
Lupinus succulentus	Fabaceae	Succulent Annual Lupine	37.1542	-121.601	191		Problem road cut along East Dunne Avenue on the east side of Anderson Reservoir, Santa Clara County, California		native	106	55	172	http://eol.org/data_objects/13264772		0.739316	0.680233	0.67451	266.154	68	67	13.9316	445			http://eol.org/schema/terms/purplish-blue
Collinsia sparsiflora	Plantaginaceae	Spinster's Blue Eyed Mary	36.379	-121.566	469		Hastings Natural History Reservation, Monterey County, California		native	112	69	69	http://eol.org/data_objects/12511623		0	0.383929	0.439216	0	38	44	-60	401	Y		http://purl.obolibrary.org/obo/PATO_0000322
Nemophila heterophylla	Boraginaceae	Variable-leaf Baby-blue-eyes	39.6072	-121.564	340		North Table Mountain Ecological Reserve, Butte County, CA		native	198	215	226	http://eol.org/data_objects/23719095		0.565476	0.123894	0.886275	203.571	12	89	-3.45238	122	Y		http://eol.org/schema/terms/greenish-blue
Delphinium patens	Ranunculaceae	Spreading Larkspur	39.6052	-121.559	370		North Table Mountain Ecological Reserve, Butte County, CA		native	88	112	234	http://eol.org/data_objects/23719274		0.639269	0.623932	0.917647	230.137	62	92	3.92694	120			http://eol.org/schema/terms/greenish-blue
Delphinium patens	Ranunculaceae	Spreading Larkspur	39.6052	-121.559	370		North Table Mountain Ecological Reserve, Butte County, CA		native	136	117	194	http://eol.org/data_objects/23719277		0.707792	0.396907	0.760784	254.805	40	76	10.7792	121			http://eol.org/schema/terms/purplish-blue
Delphinium patens subsp. patens	Ranunculaceae	Spreading Larkspur	37.1878	-121.55	809		Live Oak Trail, Henry W. Coe State Park, Santa Clara County, California		native	131	115	224	http://eol.org/data_objects/13260063		0.691131	0.486607	0.878431	248.807	49	88	9.11315	457			http://eol.org/schema/terms/purplish-blue
Nemophila menziesii	Boraginaceae	Menzies' Baby-blue-eyes	37.1863	-121.548	756		Hillside west of the cattle guard on East Dunne Avenue near the headquarters entrance at Henry W. Coe State Park, Santa Clara County, California		native	107	146	194	http://eol.org/data_objects/13265822		0.591954	0.448454	0.760784	213.103	45	76	-0.804598	447	Y		http://eol.org/schema/terms/greenish-blue
Phacelia breweri	Plantaginaceae	Brewer's Scorpionweed	37.1869	-121.547	808		Henry W. Coe State Park, Thomas Addition, Santa Clara County, California		native	203	216	235	http://eol.org/data_objects/13266968		0.598958	0.13617	0.921569	215.625	14	92	-0.104167	456			http://eol.org/schema/terms/greenish-blue
Phacelia breweri	Plantaginaceae	Brewer's Scorpionweed	37.1869	-121.547	808		Henry W. Coe State Park, Thomas Addition, Santa Clara County, California		native	196	201	229	http://eol.org/data_objects/13266967		0.641414	0.144105	0.898039	230.909	14	90	4.14141	455			http://eol.org/schema/terms/greenish-blue
Phacelia breweri	Plantaginaceae	Brewer's Scorpionweed	37.1869	-121.547	808		Henry W. Coe State Park, Thomas Addition, Santa Clara County, California		native	154	154	187	http://eol.org/data_objects/13266966		0.666667	0.176471	0.733333	240	18	73	6.66667	454			http://purl.obolibrary.org/obo/PATO_0000318
Phacelia breweri	Plantaginaceae	Brewer's Scorpionweed	37.1869	-121.547	808		Henry W. Coe State Park, Thomas Addition, Santa Clara County, California		native	157	143	177	http://eol.org/data_objects/13266965		0.735294	0.19209	0.694118	264.706	19	69	13.5294	453			http://eol.org/schema/terms/purplish-blue
Navarretia pubescens	Polemoniaceae	Downy Navarretia	37.1869	-121.547	815		Along the Alquist Trail in the area burned by the September 2007 Lick fire, Henry W. Coe State Park, Stanislaus County, California		native	98	67	154	http://eol.org/data_objects/13265805	used general SP coordinates	0.726054	0.564935	0.603922	261.379	56	60	12.6054	452			http://eol.org/schema/terms/purplish-blue
Gilia clivorum	Polemoniaceae	Purplespot Gilia	37.1869	-121.547	808		Thomas Addition, Henry W. Coe State Park, Santa Clara County, California		native	250	250	249	http://eol.org/data_objects/13262293		0.166667	0.004	0.980392	60	0	98	-43.3333	450		Y	http://purl.obolibrary.org/obo/PATO_0000324
Gilia clivorum	Polemoniaceae	Purplespot Gilia	37.1869	-121.547	808		Thomas Addition, Henry W. Coe State Park, Santa Clara County, California		native	252	253	251	http://eol.org/data_objects/13262294		0.25	0.00790514	0.992157	90	1	99	-35	449		Y	http://purl.obolibrary.org/obo/PATO_0001941
Lupinus albifrons	Fabaceae	Silver Lupine	37.1869	-121.547	808		Henry W. Coe State Park, Santa Clara County, California		native	133	126	162	http://eol.org/data_objects/13264564		0.699074	0.222222	0.635294	251.667	22	64	9.90741	451			http://eol.org/schema/terms/purplish-blue
Delphinium patens	Ranunculaceae	Spreading Larkspur	37.1869	-121.547	808		Henry W. Coe State Park, Santa Clara County, California		native	91	78	159	http://eol.org/data_objects/13260062		0.693416	0.509434	0.623529	249.63	51	62	9.34156	448			http://eol.org/schema/terms/purplish-blue
Iris macrosiphon	Iridaceae	Bowltube Iris	39.5892	-121.545	391		North Table Mountain Area, Butte County, California		native	156	145	155	http://eol.org/data_objects/13263272		0.848485	0.0705128	0.611765	305.455	7	61	24.8485	732			http://eol.org/schema/terms/reddish-purple
Delphinium patens	Ranunculaceae	Spreading Larkspur	39.5891	-121.545	392		Table Mountain, Near Oroville, California, Butte County, California		native	96	54	179	http://eol.org/data_objects/13152765		0.722667	0.698324	0.701961	260.16	70	70	12.2667	731			http://eol.org/schema/terms/purplish-blue
Camassia leichtlinii subsp. suksdorfii	Asparagaceae	Large Camas	39.6254	-121.537	276		Butte County, California, US		native	110	87	195	http://eol.org/data_objects/13149249	approximate	0.70216	0.553846	0.764706	252.778	55	76	10.216	123			http://eol.org/schema/terms/purplish-blue
Camassia leichtlinii subsp. suksdorfii	Asparagaceae	Large Camas	39.6254	-121.537	276		Butte County, California, US		native	117	85	223	http://eol.org/data_objects/13149248		0.705314	0.618834	0.87451	253.913	62	87	10.5314	124			http://eol.org/schema/terms/purplish-blue
Limosella aquatica	Scrophulariaceae	Northern Mudwort	38.5816	-121.522	5		West Region, Sacramento		native	240	235	241	http://eol.org/data_objects/1387064		0.805556	0.0248963	0.945098	290	2	95	20.5556	639			http://eol.org/schema/terms/purplish-blue
Brodiaea coronaria	Asparagaceae	Crown Brodiaea	41.7344	-121.516	1404		Lava Beds National Monument, Siskiyou County, California, US		native	68	38	67	http://eol.org/data_objects/12508854		0.838889	0.441176	0.266667	302	44	27	23.8889	837			http://eol.org/schema/terms/reddish-purple
Phlox hoodii subsp. canescens	Polemoniaceae	Hood's Phlox	41.7344	-121.516	1404		Lava Beds National Monument, Siskiyou County, California		native	223	222	236	http://eol.org/data_objects/13163502		0.678571	0.059322	0.92549	244.286	6	93	7.85714	838			http://eol.org/schema/terms/purplish-blue
Salvia columbariae	Lamiaceae	California Sage	36.7567	-121.506	893		Fremont Peak State Park, San Benito County, CA		native	119	140	213	http://eol.org/data_objects/21948023		0.629433	0.441315	0.835294	226.596	44	84	2.94326	42			http://eol.org/schema/terms/greenish-blue
Lupinus obtusilobus	Fabaceae	Blunt-lobe Lupine	40.4579	-121.502	2499	x	Lassen Volcanic National Park, Bumpass Trail, Shasta County, California		native	106	77	99	http://eol.org/data_objects/12518893	coordinates approximate	0.873563	0.273585	0.415686	314.483	27	42	27.3563	778			http://eol.org/schema/terms/reddish-purple
Iris macrosiphon	Iridaceae	Bowltube Iris	37.1732	-121.496	614		Manzanita Point, Henry W. Coe State Park, Santa Clara County, California		native	128	113	220	http://eol.org/data_objects/13263275		0.690031	0.486364	0.862745	248.411	49	86	9.00312	446			http://eol.org/schema/terms/purplish-blue
Lupinus albifrons	Fabaceae	Silver Lupine	36.1415	-121.495	654		Escondido Camp to Arroyo Seco River, Monterey County, California		native	146	124	110	http://eol.org/data_objects/12518763		0.0648148	0.246575	0.572549	23.3333	25	57	-53.5185	388			http://eol.org/schema/terms/orangish-red
Polemonium californicum	Polemoniaceae	California Polemonium	40.5068	-121.465	1973	x	Paradise Meadow Trail at Lassen Volcanic National Park		native	178	171	210	http://eol.org/data_objects/2719187	approximate	0.696581	0.185714	0.823529	250.769	19	82	9.65812	779			http://eol.org/schema/terms/purplish-blue
Phacelia tanacetifolia	Plantaginaceae	Self-heal	37.7401	-121.451	15		Corral Hollow, Alameda County, California		native	147	132	166	http://eol.org/data_objects/12522507		0.740196	0.204819	0.65098	266.471	20	65	14.0196	516			http://eol.org/schema/terms/purplish-blue
Lupinus albifrons	Fabaceae	Silver Lupine	37.7401	-121.451	15		Corral Hollow, Alameda County, California		native	72	65	77	http://eol.org/data_objects/12518758		0.763889	0.155844	0.301961	275	16	30	16.3889	515			http://eol.org/schema/terms/purplish-blue
Lupinus albifrons	Fabaceae	Silver Lupine	39.9771	-121.423	1915		Table Mountain, Butte County, California,		native	129	95	191	http://eol.org/data_objects/13159896		0.725694	0.502618	0.74902	261.25	50	75	12.5694	738			http://eol.org/schema/terms/purplish-blue
Delphinium patens	Ranunculaceae	Spreading Larkspur	39.9771	-121.423	1915		Table Mountain, Butte County, California		native	100	29	194	http://eol.org/data_objects/17766762		0.738384	0.850515	0.760784	265.818	85	76	13.8384	737			http://eol.org/schema/terms/purplish-blue
Pholistoma auritum var. auritum	Boraginaceae	Desert Fiesta-flower	37.1538	-121.389	511		Along Kaiser Aetna Road just north of county line, Henry W. Coe State Park, Stanislaus County, California		native	180	159	229	http://eol.org/data_objects/13267225		0.716667	0.305677	0.898039	258	31	90	11.6667	444			http://eol.org/schema/terms/purplish-blue
Delphinium decorum	Ranunculaceae	Yellow-tinged Larkspur	36.356	-121.274	122		Greenfield Highway, Monterey County, California		native	98	61	87	http://eol.org/data_objects/12512774	approximate	0.882883	0.377551	0.384314	317.838	38	38	28.2883	400			http://eol.org/schema/terms/reddish-purple
Lupinus succulentus	Fabaceae	Succulent Annual Lupine	36.4899	-121.185	630		Pinnacles National Monument, San Benito County, CA		native	108	12	146	http://eol.org/data_objects/23717809		0.78607	0.917808	0.572549	282.985	92	57	18.607	40			http://eol.org/schema/terms/purplish-blue
Lupinus albifrons	Fabaceae	Silver Lupine	36.4906	-121.182	581		Pinnacles National Park, San Benito County, California,		native	138	76	177	http://eol.org/data_objects/17766908		0.768977	0.570621	0.694118	276.832	57	69	16.8977	419			http://eol.org/schema/terms/purplish-blue
Gilia capitata ssp. staminea	Polemoniaceae	Bluehead Gilia	36.4665	-121.176	616		Pinnacles National Monument, San Benito County, California		native	162	159	215	http://eol.org/data_objects/13156727		0.675595	0.260465	0.843137	243.214	26	84	7.55952	410	Y		http://eol.org/schema/terms/purplish-blue
Nemophila pulchella var. fremontii	Boraginaceae	Eastwood's Baby-blue-eyes	36.4665	-121.176	616		Pinnacles National Monument, San Benito County, California		native	203	218	218	http://eol.org/data_objects/13161566		0.5	0.0688073	0.854902	180	7	85	-10	417	Y		http://eol.org/schema/terms/greenish-blue
Nemophila pulchella var. fremontii	Boraginaceae	Eastwood's Baby-blue-eyes	36.4665	-121.176	616		Pinnacles National Monument, San Benito County, California		native	223	236	239	http://eol.org/data_objects/13161565		0.53125	0.0669456	0.937255	191.25	7	94	-6.875	416	Y		http://eol.org/schema/terms/greenish-blue
Campanula griffinii	Campanulaceae	Griffin's Bellflower	36.4665	-121.176	616		Pinnacles., San Benito, California		native	131	117	102	http://eol.org/data_objects/21879513		0.0862069	0.221374	0.513725	31.0345	22	51	-51.3793	406			http://purl.obolibrary.org/obo/PATO_0001944
Nemophila menziesii	Boraginaceae	Menzies' Baby-blue-eyes	36.4665	-121.176	616		Pinnacles National Monument, San Benito County, California		native	151	184	238	http://eol.org/data_objects/13161546		0.603448	0.365546	0.933333	217.241	37	93	0.344828	415	Y		http://eol.org/schema/terms/greenish-blue
Gilia clivorum	Polemoniaceae	Purplespot Gilia	36.4665	-121.176	616		Pinnacles National Monument, San Benito County, California		native	161	160	157	http://eol.org/data_objects/13156730		0.125	0.0248447	0.631373	45	2	63	-47.5	411		Y	http://purl.obolibrary.org/obo/PATO_0001944
Gilia clivorum	Polemoniaceae	Purplespot Gilia	36.4665	-121.176	616		Pinnacles National Monument, San Benito County, California		native	221	214	249	http://eol.org/data_objects/13156728		0.7	0.140562	0.976471	252	14	98	10	412		Y	http://eol.org/schema/terms/purplish-blue
Collinsia sparsiflora var. collina	Plantaginaceae	Spinster's Blue Eyed Mary	36.4665	-121.176	616		Pinnacles National Monument, San Benito County, California		native	150	118	169	http://eol.org/data_objects/13151439		0.771242	0.301775	0.662745	277.647	30	66	17.1242	407	Y		http://eol.org/schema/terms/purplish-blue
Collinsia sparsiflora var. collina	Plantaginaceae	Spinster's Blue Eyed Mary	36.4665	-121.176	616		Pinnacles National Monument, San Benito County, California		native	139	98	149	http://eol.org/data_objects/13151440		0.800654	0.342282	0.584314	288.235	34	58	20.0654	408	Y		http://eol.org/schema/terms/purplish-blue
Delphinium patens subsp. patens	Ranunculaceae	Spreading Larkspur	36.4665	-121.176	616		Pinnacles National Monument, San Benito County, California		native	84	69	163	http://eol.org/data_objects/13152771		0.693262	0.576687	0.639216	249.574	58	64	9.32624	409			http://eol.org/schema/terms/purplish-blue
Lupinus succulentus	Fabaceae	Succulent Annual Lupine	36.4665	-121.176	616		Pinnacles National Monument, San Benito County, California		native	102	84	175	http://eol.org/data_objects/13160109		0.699634	0.52	0.686275	251.868	52	69	9.96337	413			http://eol.org/schema/terms/purplish-blue
Lupinus succulentus	Fabaceae	Succulent Annual Lupine	36.4665	-121.176	616		Pinnacles National Monument, San Benito County, California,		native	119	100	189	http://eol.org/data_objects/13160111		0.702247	0.470899	0.741176	252.809	47	74	10.2247	414			http://eol.org/schema/terms/purplish-blue
Linum lewisii	Linaceae	Prairie Flax	39.1347	-121.171	477		Nevada County, California		native	194	179	230	http://eol.org/data_objects/13264289		0.715686	0.221739	0.901961	257.647	22	90	11.5686	699			http://eol.org/schema/terms/purplish-blue
Sisyrinchium idahoense	Iridaceae	Idaho Blue-eyed-grass	39.6015	-121.048	1241		Along Scales Road, in wet seepage, Yuba County, California		native	136	109	217	http://eol.org/data_objects/20792703		0.708333	0.497696	0.85098	255	50	85	10.8333	733	Y		http://eol.org/schema/terms/purplish-blue
Camassia quamash	Asparagaceae	Small Camas	40.0058	-120.957	979		Keddie, California, United States		native	153	126	251	http://eol.org/data_objects/16124187		0.702667	0.498008	0.984314	252.96	50	98	10.2667	747			http://eol.org/schema/terms/purplish-blue
Hackelia cusickii	Boraginaceae	Cusick's Stickseed	41.519	-120.936	1551		0.5 mile E of Duncan Reservoir, on hillside on western rim of Black Canyon, Modoc County, California		native	224	241	252	http://eol.org/data_objects/13157110		0.565476	0.111111	0.988235	203.571	11	99	-3.45238	827			http://eol.org/schema/terms/greenish-blue
Hackelia cusickii	Boraginaceae	Cusick's Stickseed	41.519	-120.936	1551		0.5 mile E of Duncan Reservoir, on hillside on western rim of Black Canyon, Modoc County, California		native	190	206	227	http://eol.org/data_objects/13157111		0.594595	0.162996	0.890196	214.054	16	89	-0.540541	828			http://eol.org/schema/terms/greenish-blue
Lupinus succulentus	Fabaceae	Succulent Annual Lupine	35.4579	-120.862	125		Whale Rock Reservoir, San Luis Obispo, Southern California, US-CA		native	135	101	226	http://eol.org/data_objects/24234892		0.712	0.553097	0.886275	256.32	55	89	11.2	15			http://eol.org/schema/terms/purplish-blue
Delphinium decorum	Ranunculaceae	Yellow-tinged Larkspur	40.849	-120.857	1851		ca. 2 miles N of Slate Mtn., Trinity Mountains, Shasta County, California		native	121	71	152	http://eol.org/data_objects/13152690		0.769547	0.532895	0.596078	277.037	53	60	16.9547	805			http://eol.org/schema/terms/purplish-blue
Mertensia paniculata	Boraginaceae	Tall Bluebells	56.2524	-120.846	697		Canada, British Columbia, Fort St. John		native	106	101	199	http://eol.org/data_objects/23388305		0.67517	0.492462	0.780392	243.061	49	78	7.51701	974	Y		http://eol.org/schema/terms/purplish-blue
Ceanothus integerrimus	Rhamnaceae	California Lilac	39.9927	-120.804	1577		Plumas County, California		native	189	157	140	http://eol.org/data_objects/13258338		0.0578231	0.259259	0.741176	20.8163	26	74	-54.2177	740			http://eol.org/schema/terms/orangish-red
Veronica cusickii	Plantaginaceae	Cusick's Speedwell	39.0916	-120.804	992		Placer County, California		native	157	83	156	http://eol.org/data_objects/13270869		0.835586	0.471338	0.615686	300.811	47	62	23.5586	693			http://eol.org/schema/terms/reddish-purple
Veronica cusickii	Plantaginaceae	Cusick's Speedwell	39.0916	-120.804	992		Placer County, California		native	191	112	180	http://eol.org/data_objects/13270868		0.85654	0.413613	0.74902	308.354	41	75	25.654	692			http://eol.org/schema/terms/reddish-purple
Phlox hoodii subsp. canescens	Polemoniaceae	Hood's Phlox	39.9927	-120.804	1577		Plumas County, California		native	238	202	232	http://eol.org/data_objects/13267183		0.861111	0.151261	0.933333	310	15	93	26.1111	744			http://eol.org/schema/terms/reddish-purple
Phlox hoodii subsp. canescens	Polemoniaceae	Hood's Phlox	39.9927	-120.804	1577		Plumas County, California		native	240	218	230	http://eol.org/data_objects/13267182		0.909091	0.0916667	0.941176	327.273	9	94	30.9091	743			http://eol.org/schema/terms/reddish-purple
Hackelia micrantha	Boraginaceae	Jessica Sticktight	39.0916	-120.804	992		Placer County, California		native	166	141	203	http://eol.org/data_objects/13262520		0.733871	0.305419	0.796078	264.194	31	80	13.3871	690			http://eol.org/schema/terms/purplish-blue
Camassia leichtlinii	Asparagaceae	Large Camas	39.9927	-120.804	1577		Plumas County, California, US		native	188	171	212	http://eol.org/data_objects/13257852		0.735772	0.193396	0.831373	264.878	19	83	13.5772	739			http://eol.org/schema/terms/purplish-blue
Lupinus polyphyllus	Fabaceae	Marsh Lupine	39.0916	-120.804	992		Placer County, California		native	145	113	163	http://eol.org/data_objects/13264739		0.773333	0.306748	0.639216	278.4	31	64	17.3333	691			http://eol.org/schema/terms/purplish-blue
Lupinus grayi	Fabaceae	Sierra Lupine	39.9927	-120.804	1577		Plumas National Forest, California		native	124	104	127	http://eol.org/data_objects/12518845		0.811594	0.181102	0.498039	292.174	18	50	21.1594	742			http://eol.org/schema/terms/purplish-blue
Lupinus argenteus var. heteranthus	Fabaceae	Silvery Lupine	39.9927	-120.804	1577		Plumas County, California		native	170	142	200	http://eol.org/data_objects/13264606		0.747126	0.29	0.784314	268.966	29	78	14.7126	741			http://eol.org/schema/terms/purplish-blue
Pholistoma auritum var. auritum	Boraginaceae	Desert Fiesta-flower	35.2403	-120.78	362		Coon Creek, San Luis Obispo County, California		native	117	89	216	http://eol.org/data_objects/19204014		0.703412	0.587963	0.847059	253.228	59	85	10.3412	324			http://eol.org/schema/terms/purplish-blue
Anemone drummondii	Ranunculaceae	Drummond's Anemone	47.3906	-120.75	1800		Stafford Creek Trail 1359, Kittitas Co. Washington, USA On serpentine soil on Navaho Pass		native	210	210	210	http://eol.org/data_objects/21927589	selections from multiple specimens	0	0	0.823529	0	0	82	-60	946			http://purl.obolibrary.org/obo/PATO_0000322
Anemone drummondii	Ranunculaceae	Drummond's Anemone	47.3906	-120.75	1800		Stafford Creek Trail 1359, Kittitas Co. Washington, USA On serpentine soil on Navaho Pass		native	157	145	170	http://eol.org/data_objects/21927589	selections from multiple specimens	0.746667	0.147059	0.666667	268.8	15	67	14.6667	947			http://eol.org/schema/terms/purplish-blue
Nemophila heterophylla	Boraginaceae	Variable-leaf Baby-blue-eyes	39.0219	-120.737	532		Placer County, CA,		native	196	196	195	http://eol.org/data_objects/23718768		0.166667	0.00510204	0.768627	60	1	77	-43.3333	105	Y		http://purl.obolibrary.org/obo/PATO_0000324
Limosella aquatica	Scrophulariaceae	Northern Mudwort	40.5394	-120.712	1494		Lassen County, California		native	199	200	197	http://eol.org/data_objects/13159336		0.222222	0.015	0.784314	80	1	78	-37.7778	786			http://purl.obolibrary.org/obo/PATO_0001941
Triteleia grandiflora	Asparagaceae	Howell's Triteleia	47.5894	-120.676	380		Chelan, US-WA, Cascade Range		native	236	224	200	http://eol.org/data_objects/23389563		0.111111	0.152542	0.92549	40	15	93	-48.8889	170			http://purl.obolibrary.org/obo/PATO_0001944
Triteleia grandiflora	Asparagaceae	Howell's Triteleia	47.5894	-120.676	380		Chelan, US-WA, Cascade Range		native	208	203	241	http://eol.org/data_objects/24762625		0.688596	0.157676	0.945098	247.895	16	95	8.85965	168			http://eol.org/schema/terms/purplish-blue
Triteleia grandiflora	Asparagaceae	Howell's Triteleia	47.5894	-120.676	380		Chelan, US-WA, Cascade Range		native	197	191	228	http://eol.org/data_objects/24762626		0.693694	0.162281	0.894118	249.73	16	89	9.36937	169			http://eol.org/schema/terms/purplish-blue
Triteleia grandiflora	Asparagaceae	Howell's Triteleia	47.5894	-120.676	380		Chelan, US-WA, Cascade Range		native	199	189	237	http://eol.org/data_objects/24762624		0.701389	0.202532	0.929412	252.5	20	93	10.1389	167			http://eol.org/schema/terms/purplish-blue
Hackelia velutina	Boraginaceae	Velvet Stickseed	39.2392	-120.589	1981.2		Cedars, open forest, Middle Fk., American R., 6500', Placer County, California		native	88	112	177	http://eol.org/data_objects/12516345	coordinates approximate	0.621723	0.502825	0.694118	223.82	50	69	2.17228	707			http://eol.org/schema/terms/greenish-blue
Phacelia tanacetifolia	Plantaginaceae	Self-heal	36.5389	-120.566	498		Monvero Dunes Area, San Benito County, CA		native	153	150	187	http://eol.org/data_objects/23718320		0.68018	0.197861	0.733333	244.865	20	73	8.01802	425			http://eol.org/schema/terms/purplish-blue
Ceanothus integerrimus	Rhamnaceae	California Lilac	37.8647	-120.547	279		Trail along the South Fork of the Tuolumne River, accessed from Hwy 120, Tuolumne County, California		native	189	195	173	http://eol.org/data_objects/13258344	approximate	0.212121	0.112821	0.764706	76.3636	11	76	-38.7879	532			http://purl.obolibrary.org/obo/PATO_0001941
Leptosiphon harknessii	Polemoniaceae	Harkness' Flaxflower	39.3016	-120.547	1816		Cisco, Placer County, California		native	222	229	235	http://eol.org/data_objects/13159075		0.576923	0.0553191	0.921569	207.692	6	92	-2.30769	710			http://eol.org/schema/terms/greenish-blue
Lupinus polyphyllus	Fabaceae	Marsh Lupine	39.6574	-120.523	2040		Chapman Saddle, Sierra County, California		native	95	77	136	http://eol.org/data_objects/17786347		0.717514	0.433824	0.533333	258.305	43	53	11.7514	128			http://eol.org/schema/terms/purplish-blue
Lupinus polyphyllus	Fabaceae	Marsh Lupine	39.6574	-120.523	2040		Chapman Saddle, Sierra County, California		native	110	79	156	http://eol.org/data_objects/17786345		0.733766	0.49359	0.611765	264.156	49	61	13.3766	127			http://eol.org/schema/terms/purplish-blue
Lupinus polyphyllus	Fabaceae	Marsh Lupine	39.6574	-120.523	2040		Chapman Saddle, Sierra County, California		native	153	128	183	http://eol.org/data_objects/17786343		0.742424	0.300546	0.717647	267.273	30	72	14.2424	125			http://eol.org/schema/terms/purplish-blue
Lupinus polyphyllus	Fabaceae	Marsh Lupine	39.6574	-120.523	2040		Chapman Saddle, Sierra County, California		native	150	110	191	http://eol.org/data_objects/17786344		0.748971	0.424084	0.74902	269.63	42	75	14.8971	126			http://eol.org/schema/terms/purplish-blue
Pholistoma auritum var. auritum	Boraginaceae	Desert Fiesta-flower	37.6635	-120.464	76		Near La Grange, Stanislaus County, California		native	125	123	149	http://eol.org/data_objects/13267229		0.679487	0.174497	0.584314	244.615	17	58	7.94872	496			http://eol.org/schema/terms/purplish-blue
Lupinus albifrons	Fabaceae	Silver Lupine	37.6635	-120.464	76		Near La Grange, Stanislaus County, California		native	96	86	153	http://eol.org/data_objects/13264560		0.691542	0.437908	0.6	248.955	44	60	9.15423	495			http://eol.org/schema/terms/purplish-blue
Pholistoma auritum var. auritum	Boraginaceae	Desert Fiesta-flower	37.6658	-120.462	53		Along the Old Bridge walk in La Grange, Stanislaus County, California,		native	96	118	180	http://eol.org/data_objects/13267226		0.623016	0.466667	0.705882	224.286	47	71	2.30159	497			http://eol.org/schema/terms/greenish-blue
Ceanothus integerrimus	Rhamnaceae	California Lilac	38.206	-120.455	719		ESE Sheep Ranch, Calaveras County		native	206	205	160	http://eol.org/data_objects/13556038		0.163043	0.223301	0.807843	58.6957	22	81	-43.6957	601			http://purl.obolibrary.org/obo/PATO_0001944
Phacelia platyloba	Plantaginaceae	Broad-lobe Phacelia	37.8209	-120.441	1634		Sierra Nevada foothills, Tuolumne County, California		native	211	198	219	http://eol.org/data_objects/13267066		0.769841	0.0958904	0.858824	277.143	10	86	16.9841	525			http://eol.org/schema/terms/purplish-blue
Lupinus grayi	Fabaceae	Sierra Lupine	38.7426	-120.436	1604		El Dorado County, California		native	117	100	149	http://eol.org/data_objects/13264691	approximate	0.72449	0.328859	0.584314	260.816	33	58	12.449	661			http://eol.org/schema/terms/purplish-blue
Lupinus grayi	Fabaceae	Sierra Lupine	38.7426	-120.436	1604		El Dorado County, California		native	122	103	150	http://eol.org/data_objects/13264690	approximate	0.734043	0.313333	0.588235	264.255	31	59	13.4043	660			http://eol.org/schema/terms/purplish-blue
Salvia columbariae	Lamiaceae	California Sage	35.492	-120.433	514		San Luis Obispo, California		native	113	115	189	http://eol.org/data_objects/24050220		0.662281	0.402116	0.741176	238.421	40	74	6.22807	16			http://eol.org/schema/terms/greenish-blue
Gentianopsis holopetala	Gentianaceae	Sierra Fringed Gentian	39.0664	-120.428	1850		Big Meadow, El Dorado County, California,		native	148	141	247	http://eol.org/data_objects/23598344		0.677673	0.42915	0.968627	243.962	43	97	7.7673	688			http://eol.org/schema/terms/purplish-blue
Lupinus chamissonis	Fabaceae	Chamisso's-bush Lupine	34.0376	-120.372	194		San Miguel Island, Channel Islands National Park, Santa Barbara County, California		native	100	93	162	http://eol.org/data_objects/23862233		0.683575	0.425926	0.635294	246.087	43	64	8.35749	278			http://eol.org/schema/terms/purplish-blue
Lupinus chamissonis	Fabaceae	Chamisso's-bush Lupine	34.0376	-120.372	194		San Miguel Island, Channel Islands National Park, Santa Barbara County, California		native	115	85	168	http://eol.org/data_objects/23862234		0.726908	0.494048	0.658824	261.687	49	66	12.6908	277			http://eol.org/schema/terms/purplish-blue
Lupinus succulentus	Fabaceae	Succulent Annual Lupine	34.0376	-120.372	194		San Miguel Island, Channel Islands National Park, Santa Barbara County, California		native	95	78	156	http://eol.org/data_objects/13264776		0.702991	0.5	0.611765	253.077	50	61	10.2991	279			http://eol.org/schema/terms/purplish-blue
Lupinus succulentus	Fabaceae	Succulent Annual Lupine	34.0376	-120.372	194		San Miguel Island, Channel Islands National Park, Santa Barbara County, California		native	147	106	185	http://eol.org/data_objects/13264777		0.753165	0.427027	0.72549	271.139	43	73	15.3165	280			http://eol.org/schema/terms/purplish-blue
Camassia quamash	Asparagaceae	Small Camas	39.3154	-120.372	1981.2		Cedars, wet meadows above L. Van Norden, 6500', Placer County, California, US		native	77	94	217	http://eol.org/data_objects/12509622	GoogleEarth shows 2062 m	0.646429	0.645161	0.85098	232.714	65	85	4.64286	711			http://eol.org/schema/terms/greenish-blue
Polemonium californicum	Polemoniaceae	California Polemonium	39.4166	-120.309	2465		Sagehen Creek Field Station, Nevada County, CA		native	100	126	190	http://eol.org/data_objects/21951841		0.618519	0.473684	0.745098	222.667	47	75	1.85185	108			http://eol.org/schema/terms/greenish-blue
Lupinus breweri	Fabaceae	Mat Lupine	39.1963	-120.288	2590.8		Cedars, ridge below Granite Chief, 8500', Placer County, California		native	57	57	140	http://eol.org/data_objects/12518813		0.666667	0.592857	0.54902	240	59	55	6.66667	706			http://purl.obolibrary.org/obo/PATO_0000318
Polemonium occidentale	Polemoniaceae	Western Polemonium	39.4255	-120.259	2065		Sagehen Creek Basin, Nevada, Tahoe National Forest, Sierra Nevada		native	113	105	183	http://eol.org/data_objects/25204079		0.683761	0.42623	0.717647	246.154	43	72	8.37607	109			http://eol.org/schema/terms/purplish-blue
Collinsia parviflora	Plantaginaceae	Blue-eyed Mary	39.5533	-120.251	2042		Sierra County, California		native	213	203	248	http://eol.org/data_objects/13259185		0.703704	0.181452	0.972549	253.333	18	97	10.3704	723	Y		http://eol.org/schema/terms/purplish-blue
Viola sororia var. missouriensis	Violaceae	Sand Violet	39.5533	-120.251	2042		Sierra County, California		native	189	116	185	http://eol.org/data_objects/13271001		0.842466	0.386243	0.741176	303.288	39	74	24.2466	726			http://eol.org/schema/terms/reddish-purple
Mertensia oblongifolia	Boraginaceae	Spindleroot Bluebells	39.5533	-120.251	2042		Sierra County, California		native	227	233	230	http://eol.org/data_objects/13265280		0.416667	0.0257511	0.913725	150	3	91	-18.3333	724	Y		http://eol.org/schema/terms/greenish-blue
Mertensia oblongifolia	Boraginaceae	Spindleroot Bluebells	39.5533	-120.251	2042		Sierra County, California,		native	240	246	239	http://eol.org/data_objects/13265278		0.309524	0.0284553	0.964706	111.429	3	96	-29.0476	725	Y		http://purl.obolibrary.org/obo/PATO_0001941
Lupinus polyphyllus	Fabaceae	Marsh Lupine	39.4331	-120.248	1964		Sagehen Creek Basin, Nevada, Tahoe National Forest, Sierra Nevada		native	124	133	214	http://eol.org/data_objects/25275081		0.65	0.420561	0.839216	234	42	84	5	115			http://eol.org/schema/terms/greenish-blue
Polemonium occidentale	Polemoniaceae	Western Polemonium	39.4319	-120.244	1946		Sagehen Creek Basin, Nevada, Tahoe National Forest, Sierra Nevada		native	123	117	191	http://eol.org/data_objects/25398329		0.68018	0.387435	0.74902	244.865	39	75	8.01802	113			http://eol.org/schema/terms/purplish-blue
Polemonium occidentale	Polemoniaceae	Western Polemonium	39.4317	-120.242	1941		Sagehen Creek Basin, Nevada, Tahoe National Forest, Sierra Nevada		native	151	147	208	http://eol.org/data_objects/25155105		0.677596	0.293269	0.815686	243.934	29	82	7.75956	112			http://eol.org/schema/terms/purplish-blue
Polemonium occidentale	Polemoniaceae	Western Polemonium	39.4317	-120.242	1947		Tahoe National Forest, Truckee, California,		native	140	137	162	http://eol.org/data_objects/25154629		0.686667	0.154321	0.635294	247.2	15	64	8.66667	111			http://eol.org/schema/terms/purplish-blue
Polemonium occidentale subsp. occidentale	Polemoniaceae	Western Polemonium	39.4321	-120.241	1945		Sagehen Creek Basin, Nevada, Tahoe National Forest, Sierra Nevada		native	123	125	194	http://eol.org/data_objects/25083812		0.661972	0.365979	0.760784	238.31	37	76	6.19718	114			http://eol.org/schema/terms/greenish-blue
Brodiaea coronaria	Asparagaceae	Crown Brodiaea	37.5022	-120.238	257		Hornitos, Mariposa County, California, US		native	126	87	121	http://eol.org/data_objects/12508853		0.854701	0.309524	0.494118	307.692	31	49	25.4701	477			http://eol.org/schema/terms/reddish-purple
Polemonium occidentale	Polemoniaceae	Western Polemonium	39.4316	-120.236	1936		Nevada, Tahoe National Forest, California		native	121	115	212	http://eol.org/data_objects/25399889		0.676976	0.457547	0.831373	243.711	46	83	7.69759	110			http://eol.org/schema/terms/purplish-blue
Iris macrosiphon	Iridaceae	Bowltube Iris	37.2554	-120.223	578		Sierra foothills, Placerville, El Dorado County, California		native	111	95	95	http://eol.org/data_objects/12517246	approximate	0	0.144144	0.435294	0	14	44	-60	463			http://purl.obolibrary.org/obo/PATO_0000322
Camassia quamash	Asparagaceae	Small Camas	37.2554	-120.223	578		Sierra foothills, Merced County, California, US		native	61	57	81	http://eol.org/data_objects/12509623	appears to be an older slide; approximate	0.694444	0.296296	0.317647	250	30	32	9.44444	462			http://eol.org/schema/terms/purplish-blue
Polemonium occidentale	Polemoniaceae	Western Polemonium	39.4338	-120.206	1883		Sagehen Creek Basin, Nevada, Tahoe National Forest, Sierra Nevada		native	127	111	159	http://eol.org/data_objects/25155522		0.722222	0.301887	0.623529	260	30	62	12.2222	116			http://eol.org/schema/terms/purplish-blue
Hackelia floribunda	Boraginaceae	Manyflower Stickseed	39.5524	-120.203	2042		East side of Sierra, California		native	92	85	128	http://eol.org/data_objects/12516335		0.693798	0.335938	0.501961	249.767	34	50	9.37984	721			http://eol.org/schema/terms/purplish-blue
Lupinus breweri var. grandiflorus	Fabaceae	Mat Lupine	39.5524	-120.203	2042		East side of Sierra, California		native	53	29	49	http://eol.org/data_objects/12518814		0.861111	0.45283	0.207843	310	45	21	26.1111	722			http://eol.org/schema/terms/reddish-purple
Nemophila menziesii	Boraginaceae	Menzies' Baby-blue-eyes	37.7351	-120.187	608		Along J132 at Priest-Coulterville Road, Mariposa County, California		native	152	174	215	http://eol.org/data_objects/13265826		0.608466	0.293023	0.843137	219.048	29	84	0.846561	514	Y		http://eol.org/schema/terms/greenish-blue
Linum lewisii	Linaceae	Prairie Flax	38.0909	-120.147	1411		Along Hwy 108, Tuolumne County, California		native	135	155	211	http://eol.org/data_objects/13264286		0.622807	0.36019	0.827451	224.211	36	83	2.2807	599			http://eol.org/schema/terms/greenish-blue
Gilia capitata ssp. mediomontana	Polemoniaceae	Foothill Gilia	37.5783	-120.12	727		At the entrance to French Mine Road, along Hwy 49 between Bagby and Bear Valley, Mariposa County, California		native	173	180	211	http://eol.org/data_objects/13262292		0.635965	0.180095	0.827451	228.947	18	83	3.59649	481			http://eol.org/schema/terms/greenish-blue
Polemonium occidentale	Polemoniaceae	Western Polemonium	39.2415	-120.038	1907		Agatam Meadow, Tahoe Vista, CA		native	89	109	135	http://eol.org/data_objects/25203568		0.594203	0.340741	0.529412	213.913	34	53	-0.57971	107			http://eol.org/schema/terms/greenish-blue
Myosotis discolor	Boraginaceae	Yellow-and-blue Forget-me-not	37.821	-120.017	890		Along the concrete walkways near the facility at Rainbow Pool, Tuolumne County, California		native	89	115	159	http://eol.org/data_objects/13265718		0.604762	0.440252	0.623529	217.714	44	62	0.47619	526	Y		http://eol.org/schema/terms/greenish-blue
Hackelia floribunda	Boraginaceae	Manyflower Stickseed	38.6948	-119.989	2622		ElDorado National Forest, near Carson Pass, El Dorado County, California		native	104	107	175	http://eol.org/data_objects/12516333		0.659624	0.405714	0.686275	237.465	41	69	5.96244	655			http://eol.org/schema/terms/greenish-blue
Hackelia floribunda	Boraginaceae	Manyflower Stickseed	38.6938	-119.989	2616		Carson Pass Area, Alpine County, California		native	154	184	214	http://eol.org/data_objects/17786264		0.583333	0.280374	0.839216	210	28	84	-1.66667	647			http://eol.org/schema/terms/greenish-blue
Hackelia floribunda	Boraginaceae	Manyflower Stickseed	38.6938	-119.989	2616		Carson Pass Area, Alpine County, California		native	145	181	219	http://eol.org/data_objects/17786265		0.585586	0.3379	0.858824	210.811	34	86	-1.44144	648			http://eol.org/schema/terms/greenish-blue
Lupinus polyphyllus	Fabaceae	Marsh Lupine	38.6938	-119.989	2616		Carson Pass Area, Alpine County, California		native	64	56	110	http://eol.org/data_objects/17786352		0.691358	0.490909	0.431373	248.889	49	43	9.1358	653			http://eol.org/schema/terms/purplish-blue
Lupinus polyphyllus	Fabaceae	Marsh Lupine	38.6938	-119.989	2616		Carson Pass Area, Alpine County, California		native	125	109	188	http://eol.org/data_objects/17786348		0.700422	0.420213	0.737255	252.152	42	74	10.0422	649			http://eol.org/schema/terms/purplish-blue
Lupinus polyphyllus	Fabaceae	Marsh Lupine	38.6938	-119.989	2616		Carson Pass Area, Alpine County, California		native	161	137	213	http://eol.org/data_objects/17786351		0.719298	0.356808	0.835294	258.947	36	84	11.9298	652			http://eol.org/schema/terms/purplish-blue
Lupinus polyphyllus	Fabaceae	Marsh Lupine	38.6938	-119.989	2616		Carson Pass Area, Alpine County, California		native	131	97	188	http://eol.org/data_objects/17786350		0.728938	0.484043	0.737255	262.418	48	74	12.8938	651			http://eol.org/schema/terms/purplish-blue
Lupinus polyphyllus	Fabaceae	Marsh Lupine	38.6938	-119.989	2616		Carson Pass Area, Alpine County, California		native	163	129	201	http://eol.org/data_objects/17786349		0.74537	0.358209	0.788235	268.333	36	79	14.537	650			http://eol.org/schema/terms/purplish-blue
Polemonium pulcherrimum	Polemoniaceae	Showy Jacob's-ladder	38.6938	-119.989	2616		Carson Pass Area, Alpine County, California		native	170	135	210	http://eol.org/data_objects/18593324		0.744444	0.357143	0.823529	268	36	82	14.4444	654			http://eol.org/schema/terms/purplish-blue
Gilia capitata subsp. abrotanifolia	Polemoniaceae	Bluehead Gilia	34.7435	-119.985	1376		Figueroa Mountain, Santa Barbara County, California		native	193	200	210	http://eol.org/data_objects/13156718		0.598039	0.0809524	0.823529	215.294	8	82	-0.196078	305	Y		http://eol.org/schema/terms/greenish-blue
Lupinus nevadensis	Fabaceae	Nevada Lupine	39.5855	-119.931	2468		Peavine Mountain, Washoe, Nevada		native	63	70	99	http://eol.org/data_objects/17766917		0.634259	0.363636	0.388235	228.333	36	39	3.42593	727			http://eol.org/schema/terms/greenish-blue
Lupinus nevadensis	Fabaceae	Nevada Lupine	39.5855	-119.931	2468		Peavine Mountain, Washoe, Nevada		native	77	84	127	http://eol.org/data_objects/17766913		0.643333	0.393701	0.498039	231.6	39	50	4.33333	730			http://eol.org/schema/terms/greenish-blue
Lupinus nevadensis	Fabaceae	Nevada Lupine	39.5855	-119.931	2468		Peavine Mountain, Washoe, Nevada		native	92	90	148	http://eol.org/data_objects/17766914		0.672414	0.391892	0.580392	242.069	39	58	7.24138	729			http://eol.org/schema/terms/purplish-blue
Lupinus nevadensis	Fabaceae	Nevada Lupine	39.5855	-119.931	2468		Peavine Mountain, Washoe, Nevada		native	90	83	147	http://eol.org/data_objects/17766915		0.684896	0.435374	0.576471	246.562	44	58	8.48958	728			http://eol.org/schema/terms/purplish-blue
Viola sororia var. affinis	Violaceae	Hooded Blue Violet	39.107	-119.916	2147		Spooner Lake, Douglas, Nevada		native	156	143	224	http://eol.org/data_objects/17786546		0.693416	0.361607	0.878431	249.63	36	88	9.34156	698	Y		http://eol.org/schema/terms/purplish-blue
Hackelia micrantha	Boraginaceae	Jessica Sticktight	39.107	-119.916	2147		Spooner Lake, Douglas, Nevada		native	91	156	194	http://eol.org/data_objects/17786266		0.561489	0.530928	0.760784	202.136	53	76	-3.85113	697			http://eol.org/schema/terms/greenish-blue
Hackelia velutina	Boraginaceae	Velvet Stickseed	39.2914	-119.912	2213		Tahoe Meadows, Washoe, Nevada,		native	167	183	237	http://eol.org/data_objects/17766854		0.628571	0.295359	0.929412	226.286	30	93	2.85714	708			http://eol.org/schema/terms/greenish-blue
Hackelia velutina	Boraginaceae	Velvet Stickseed	39.2914	-119.912	2213		Tahoe Meadows, Washoe, Nevada,		native	116	132	188	http://eol.org/data_objects/17766855		0.62963	0.382979	0.737255	226.667	38	74	2.96296	709			http://eol.org/schema/terms/greenish-blue
Phacelia quickii	Plantaginaceae	Quick's Scorpionweed	37.9717	-119.911	1348		Along Cherry Lake Road near Cherry Lake, Tuolumne County, California		native	93	82	144	http://eol.org/data_objects/13267069		0.696237	0.430556	0.564706	250.645	43	56	9.62366	587			http://eol.org/schema/terms/purplish-blue
Nemophila menziesii	Boraginaceae	Menzies' Baby-blue-eyes	37.8754	-119.899	1294		Abernathy Lava Caps, Tuolumne County, California		native	104	141	194	http://eol.org/data_objects/13265828		0.598148	0.463918	0.760784	215.333	46	76	-0.185185	558	Y		http://eol.org/schema/terms/greenish-blue
Collinsia parviflora	Plantaginaceae	Blue-eyed Mary	39.4533	-119.884	2056		Hunter Lake Road, Washoe, Nevada		native	129	138	188	http://eol.org/data_objects/17747720		0.641243	0.31383	0.737255	230.847	31	74	4.12429	713	Y		http://eol.org/schema/terms/greenish-blue
Polemonium californicum	Polemoniaceae	California Polemonium	38.5941	-119.882	2436		Alpine County, California		native	127	125	147	http://eol.org/data_objects/13267588		0.681818	0.14966	0.576471	245.455	15	58	8.18182	641			http://eol.org/schema/terms/purplish-blue
Myosotis discolor	Boraginaceae	Yellow-and-blue Forget-me-not	37.8138	-119.862	1344		Along the edge of the small parking area at the Carlon Falls trailhead, Tuolumne County, California		native	106	133	191	http://eol.org/data_objects/13265720		0.613725	0.445026	0.74902	220.941	45	75	1.37255	522	Y		http://eol.org/schema/terms/greenish-blue
Myosotis discolor	Boraginaceae	Yellow-and-blue Forget-me-not	37.8138	-119.862	1344		Along the edge of the small parking area at the Carlon Falls trailhead, Tuolumne County, California,		native	123	142	178	http://eol.org/data_objects/13265719		0.609091	0.308989	0.698039	219.273	31	70	0.909091	523	Y		http://eol.org/schema/terms/greenish-blue
Triodanis perfoliata subsp. Biflora	Campanulaceae	Claspingleaf Venus'-looking-glass	33.9986	-119.858	120		Channel Islands National Park, Santa Barbara County, California, Santa Cruz Island, Channel Islands	No	native	185	133	216	http://eol.org/data_objects/13169678		0.771084	0.384259	0.847059	277.59	38	85	17.1084	275			http://eol.org/schema/terms/purplish-blue
Pholistoma auritum var. auritum	Boraginaceae	Desert Fiesta-flower	37.6617	-119.849	478		Along a drainage at the east end of Indian Flat, Mariposa County, California		native	117	123	197	http://eol.org/data_objects/13267227		0.654167	0.406091	0.772549	235.5	41	77	5.41667	491			http://eol.org/schema/terms/greenish-blue
Collinsia parviflora	Plantaginaceae	Blue-eyed Mary	37.8433	-119.835	1429		Along the gated dirt road south of Ackerson Meadow, Tuolumne County, California		native	125	122	167	http://eol.org/data_objects/13259187		0.677778	0.269461	0.654902	244	27	65	7.77778	528	Y		http://eol.org/schema/terms/purplish-blue
Collinsia parviflora	Plantaginaceae	Blue-eyed Mary	37.9039	-119.827	1594		Along Hetch Hetchy road east of Mather, Yosemite National Park, Tuolumne County, California		native	76	89	126	http://eol.org/data_objects/13259189		0.623333	0.396825	0.494118	224.4	40	49	2.33333	571	Y		http://eol.org/schema/terms/greenish-blue
Ceanothus integerrimus	Rhamnaceae	California Lilac	37.6747	-119.784	585		Yosemite/El Portal, Mariposa County, California		native	168	157	130	http://eol.org/data_objects/12510430		0.118421	0.22619	0.658824	42.6316	23	66	-48.1579	498			http://purl.obolibrary.org/obo/PATO_0001944
Lupinus argenteus var. heteranthus	Fabaceae	Silvery Lupine	39.1638	-119.767	1477		Carson City, Nevada		native	157	89	145	http://eol.org/data_objects/13264603		0.862745	0.433121	0.615686	310.588	43	62	26.2745	704			http://eol.org/schema/terms/reddish-purple
Salvia azurea var. grandiflora	Lamiaceae	Azure Blue Sage	39.5349	-119.753	1347		Garden, Sparks, NV		native	123	148	209	http://eol.org/data_objects/13268725		0.618217	0.411483	0.819608	222.558	41	82	1.82171	716	Y		http://eol.org/schema/terms/greenish-blue
Salvia azurea var. grandiflora	Lamiaceae	Azure Blue Sage	39.5349	-119.753	1347		Garden, Sparks, NV		native	128	146	199	http://eol.org/data_objects/13268723		0.624413	0.356784	0.780392	224.789	36	78	2.44131	717	Y		http://eol.org/schema/terms/greenish-blue
Salvia azurea var. grandiflora	Lamiaceae	Azure Blue Sage	39.5349	-119.753	1347		Garden, Sparks, NV		native	128	152	229	http://eol.org/data_objects/13268726	approximate	0.627063	0.441048	0.898039	225.743	44	90	2.70627	719	Y		http://eol.org/schema/terms/greenish-blue
Salvia azurea var. grandiflora	Lamiaceae	Azure Blue Sage	39.5349	-119.753	1347		Garden, Sparks, NV		native	155	165	211	http://eol.org/data_objects/13268724		0.636905	0.265403	0.827451	229.286	27	83	3.69048	718	Y		http://eol.org/schema/terms/greenish-blue
Lupinus grayi	Fabaceae	Sierra Lupine	37.7029	-119.753	1184		Area above Big Meadow burned during the 2009 Big Meadow fire, Mariposa County, California		native	91	71	129	http://eol.org/data_objects/13264696		0.724138	0.449612	0.505882	260.69	45	51	12.4138	501			http://eol.org/schema/terms/purplish-blue
Lupinus grayi	Fabaceae	Sierra Lupine	37.7286	-119.751	1600		Yosemite National Park, Big Oak Flat Road, Tuolumne County, California		native	108	76	80	http://eol.org/data_objects/12518841		0.979167	0.296296	0.423529	352.5	30	42	37.9167	508			http://eol.org/schema/terms/reddish-purple
Lupinus albifrons	Fabaceae	Silver Lupine	37.7286	-119.751	1600		Sandstone roadcut along Hwy 120 west of the Big Oak Flat entrance to Yosemite National Park, Tuolumne County, California,		native	141	100	180	http://eol.org/data_objects/13264565		0.752083	0.444444	0.705882	270.75	44	71	15.2083	507			http://eol.org/schema/terms/purplish-blue
Nemophila menziesii	Boraginaceae	Menzies' Baby-blue-eyes	35.1395	-119.743	605		Carrizo Plain, San Luis Obispo County, California		native	100	134	185	http://eol.org/data_objects/13265820		0.6	0.459459	0.72549	216	46	73	0	317	Y		http://eol.org/schema/terms/greenish-blue
Phacelia fremontii	Plantaginaceae		35.1395	-119.743	605		Carrizo Plain, San Luis Obispo County, California		native	139	126	212	http://eol.org/data_objects/13267011		0.69186	0.40566	0.831373	249.07	41	83	9.18605	318			http://eol.org/schema/terms/purplish-blue
Polemonium californicum	Polemoniaceae	California Polemonium	37.7534	-119.738	1989		Along the Tamarack Creek Trail above Tamarack Campground, Yosemite National Park, Mariposa County, California		native	159	160	213	http://eol.org/data_objects/13267590		0.66358	0.253521	0.835294	238.889	25	84	6.35802	519			http://eol.org/schema/terms/greenish-blue
Phlox hoodii subsp. canescens	Polemoniaceae	Hood's Phlox	39.1476	-119.713	1403		Prison Hill, Carson City Rural Area, Nevada		native	165	155	185	http://eol.org/data_objects/13267187		0.722222	0.162162	0.72549	260	16	73	12.2222	702			http://eol.org/schema/terms/purplish-blue
Phlox hoodii subsp. canescens	Polemoniaceae	Hood's Phlox	39.1476	-119.713	1403		Prison Hill, Carson City Rural Area, Nevada		native	235	211	238	http://eol.org/data_objects/13267186		0.814815	0.113445	0.933333	293.333	11	93	21.4815	701			http://eol.org/schema/terms/purplish-blue
Iris missouriensis	Iridaceae	Rocky Mountain Iris	39.0122	-119.706	1499		Sunrise Pass Road, Douglas, Nevada,		native	127	114	121	http://eol.org/data_objects/13263282		0.910256	0.102362	0.498039	327.692	10	50	31.0256	683			http://eol.org/schema/terms/reddish-purple
Phacelia tanacetifolia	Plantaginaceae	Self-heal	34.4235	-119.704	26		Santa Barbara, Santa Barbara County, California		native	212	179	228	http://eol.org/data_objects/12522503	approximate	0.778912	0.214912	0.894118	280.408	21	89	17.8912	304			http://eol.org/schema/terms/purplish-blue
Lupinus grayi	Fabaceae	Sierra Lupine	37.7229	-119.696	1418		Along Big Oak Flat Road near the road to Foresta, Mariposa County, California,		native	159	173	207	http://eol.org/data_objects/13264692		0.618056	0.231884	0.811765	222.5	23	81	1.80556	502			http://eol.org/schema/terms/greenish-blue
Lupinus grayi	Fabaceae	Sierra Lupine	37.7229	-119.696	1418		Along Big Oak Flat Road near the road to Foresta, Mariposa County, California,		native	144	135	176	http://eol.org/data_objects/13264694		0.703252	0.232955	0.690196	253.171	23	69	10.3252	504			http://eol.org/schema/terms/purplish-blue
Lupinus grayi	Fabaceae	Sierra Lupine	37.7229	-119.696	1418		Along Big Oak Flat Road near the road to Foresta, Mariposa County, California,		native	180	172	195	http://eol.org/data_objects/13264693		0.724638	0.117949	0.764706	260.87	12	76	12.4638	503			http://eol.org/schema/terms/purplish-blue
Lupinus grayi	Fabaceae	Sierra Lupine	37.7229	-119.696	1418		Upper part of the road to Foresta from Big Oak Flat Road, on both sides of the road, Mariposa County, California		native	197	208	184	http://eol.org/data_objects/13264695		0.243056	0.115385	0.815686	87.5	12	82	-35.6944	505			http://purl.obolibrary.org/obo/PATO_0001941
Pholistoma auritum var. auritum	Boraginaceae	Desert Fiesta-flower	34.0214	-119.685	1		Channel Islands National Park, Santa Cruz Island, Prisoners Harbor, Santa Barbara County, California		native	121	81	200	http://eol.org/data_objects/13267228		0.722689	0.595	0.784314	260.168	60	78	12.2689	276			http://eol.org/schema/terms/purplish-blue
Salvia azurea var. grandiflora	Lamiaceae	Azure Blue Sage	40.63	-119.68	1315		Nevada, Washoe Co.		native	142	176	233	http://eol.org/data_objects/18696326		0.604396	0.390558	0.913725	217.582	39	91	0.43956	802	Y		http://eol.org/schema/terms/greenish-blue
Salvia azurea var. grandiflora	Lamiaceae	Azure Blue Sage	40.63	-119.68	1315		Nevada, Washoe Co.		native	165	183	229	http://eol.org/data_objects/18696327		0.619792	0.279476	0.898039	223.125	28	90	1.97917	803	Y		http://eol.org/schema/terms/greenish-blue
Salvia azurea var. grandiflora	Lamiaceae	Azure Blue Sage	40.63	-119.68	1315		Nevada, Washoe Co.		native	129	124	202	http://eol.org/data_objects/18696325		0.67735	0.386139	0.792157	243.846	39	79	7.73504	801	Y		http://eol.org/schema/terms/purplish-blue
Ceanothus integerrimus	Rhamnaceae	California Lilac	37.6596	-119.662	2266		Yosemite National Park, Badger Pass, Mariposa County, California		native	227	195	182	http://eol.org/data_objects/12510433		0.0481481	0.198238	0.890196	17.3333	20	89	-55.1852	490			http://eol.org/schema/terms/orangish-red
Camassia quamash	Asparagaceae	Small Camas	37.6596	-119.662	2266		Yosemite National Park, Badger Pass, Mariposa County, California, US		native	107	96	149	http://eol.org/data_objects/12509626	appears to be an older slide	0.701258	0.355705	0.584314	252.453	36	58	10.1258	489			http://eol.org/schema/terms/purplish-blue
Lupinus polyphyllus	Fabaceae	Marsh Lupine	37.5369	-119.656	1222		Yosemite National Park, Wawona, Mariposa County, California		native	91	61	75	http://eol.org/data_objects/12518901		0.922222	0.32967	0.356863	332	33	36	32.2222	478			http://eol.org/schema/terms/reddish-purple
Phacelia platyloba	Plantaginaceae	Broad-lobe Phacelia	37.3715	-119.643	1061		Along an unmarked dirt road near Yosemite Forks, Fresno County, California		native	186	188	202	http://eol.org/data_objects/13267067		0.645833	0.0792079	0.792157	232.5	8	79	4.58333	472			http://eol.org/schema/terms/greenish-blue
Nemophila pulchella var. pulchella	Boraginaceae	Eastwood's Baby-blue-eyes	37.3715	-119.643	1061		Along an unmarked dirt road near Yosemite Forks, Fresno County, California,		native	144	109	202	http://eol.org/data_objects/13265836		0.729391	0.460396	0.792157	262.581	46	79	12.9391	471	Y		http://eol.org/schema/terms/purplish-blue
Nemophila pulchella var. pulchella	Boraginaceae	Eastwood's Baby-blue-eyes	37.3715	-119.643	1061		Along an unmarked dirt road near Yosemite Forks, Fresno County, California,		native	176	116	170	http://eol.org/data_objects/13265835		0.85	0.340909	0.690196	306	34	69	25	470	Y		http://eol.org/schema/terms/reddish-purple
Linum lewisii	Linaceae	Prairie Flax	38.328	-119.637	2945	x	Sonora Pass dayuse parking area, Tuolumne County, California		native	151	152	218	http://eol.org/data_objects/13264293		0.664179	0.307339	0.854902	239.104	31	85	6.41791	615			http://eol.org/schema/terms/greenish-blue
Lupinus argenteus var. meionanthus	Fabaceae	Silvery Lupine	38.328	-119.637	2945	x	Slope just east of the Sonora Pass dayuse parking area, Tuolumne County, California		native	50	72	137	http://eol.org/data_objects/13264610		0.624521	0.635036	0.537255	224.828	64	54	2.45211	617			http://eol.org/schema/terms/greenish-blue
Lupinus argenteus var. meionanthus	Fabaceae	Silvery Lupine	38.328	-119.637	2945	x	Slope just east of the Sonora Pass dayuse parking area, Tuolumne County, California		native	59	72	150	http://eol.org/data_objects/13264611		0.642857	0.606667	0.588235	231.429	61	59	4.28571	618			http://eol.org/schema/terms/greenish-blue
Lupinus argenteus var. meionanthus	Fabaceae	Silvery Lupine	38.328	-119.637	2945	x	Slope just east of the Sonora Pass dayuse parking area, Tuolumne County, California		native	52	57	134	http://eol.org/data_objects/13264612		0.656504	0.61194	0.52549	236.341	61	53	5.65041	616			http://eol.org/schema/terms/greenish-blue
Anemone drummondii	Ranunculaceae	Drummond's Anemone	38.3277	-119.637	2932	x	Near Sonora Pass, Tuolumne County, California		native	216	228	243	http://eol.org/data_objects/23483759		0.592593	0.111111	0.952941	213.333	11	95	-0.740741	608			http://eol.org/schema/terms/greenish-blue
Anemone drummondii	Ranunculaceae	Drummond's Anemone	38.3277	-119.637	2932	x	Sonora Pass, Mono County, California, US		native	217	215	212	http://eol.org/data_objects/13146589		0.1	0.0230415	0.85098	36	2	85	-50	609			http://purl.obolibrary.org/obo/PATO_0001944
Anemone drummondii	Ranunculaceae	Drummond's Anemone	38.3277	-119.637	2932	x	Sonora Pass, Mono County, California, US		native	206	205	194	http://eol.org/data_objects/13146590		0.152778	0.0582524	0.807843	55	6	81	-44.7222	610			http://purl.obolibrary.org/obo/PATO_0001944
Leptosiphon harknessii	Polemoniaceae	Harkness' Flaxflower	38.3277	-119.637	2932	x	Sonora Pass dayuse parking area, Tuolumne County, California		native	181	198	209	http://eol.org/data_objects/24743627		0.565476	0.133971	0.819608	203.571	13	82	-3.45238	612			http://eol.org/schema/terms/greenish-blue
Lupinus breweri	Fabaceae	Mat Lupine	38.3277	-119.637	2932	x	Sonora Pass, Mono County, California,		native	156	165	236	http://eol.org/data_objects/13159940		0.647917	0.338983	0.92549	233.25	34	93	4.79167	613			http://eol.org/schema/terms/greenish-blue
Collinsia sparsiflora	Plantaginaceae	Spinster's Blue Eyed Mary	38.3277	-119.637	2932	x	Sonora Pass, Tuolumne County, California		native	186	194	229	http://eol.org/data_objects/13151436		0.635659	0.187773	0.898039	228.837	19	90	3.56589	611	Y		http://eol.org/schema/terms/greenish-blue
Polemonium occidentale	Polemoniaceae	Western Polemonium	38.3277	-119.637	2932	x	California, Mono County, Sonora Pass		native	139	127	175	http://eol.org/data_objects/23357215		0.708333	0.274286	0.686275	255	27	69	10.8333	614			http://eol.org/schema/terms/purplish-blue
Anemone drummondii var. drummondii	Ranunculaceae	Drummond's Anemone	38.3285	-119.635	2925	x	Slope near Hwy 108 above the day-use area at Sonora Pass, Mono County, California, US		native	191	207	222	http://eol.org/data_objects/18696135		0.580645	0.13964	0.870588	209.032	14	87	-1.93548	621			http://eol.org/schema/terms/greenish-blue
Anemone drummondii var. drummondii	Ranunculaceae	Drummond's Anemone	38.3285	-119.635	2925	x	Slope near Hwy 108 above the day-use area at Sonora Pass, Mono County, California, US		native	220	230	249	http://eol.org/data_objects/18696136		0.609195	0.116466	0.976471	219.31	12	98	0.91954	622			http://eol.org/schema/terms/greenish-blue
Anemone drummondii	Ranunculaceae	Drummond's Anemone	38.3285	-119.635	2925	x	Sonora Pass, on the slope north of, and very near Hwy 108 just east of the pass, Mono County, California, US		native	161	174	190	http://eol.org/data_objects/22938028		0.591954	0.152632	0.745098	213.103	15	75	-0.804598	619			http://eol.org/schema/terms/greenish-blue
Anemone drummondii	Ranunculaceae	Drummond's Anemone	38.3285	-119.635	2925	x	Sonora Pass, on the slope north of, and very near Hwy 108 just east of the pass, Mono County, California, US		native	171	184	202	http://eol.org/data_objects/22938029		0.596774	0.153465	0.792157	214.839	15	79	-0.322581	620			http://eol.org/schema/terms/greenish-blue
Delphinium patens subsp. hepaticoideum	Ranunculaceae	Spreading Larkspur	37.6778	-119.624	2104		McGurk Meadow north of Glacier Point road, Yosemite National Park, Mariposa County, California		native	127	136	234	http://eol.org/data_objects/13152769		0.652648	0.457265	0.917647	234.953	46	92	5.2648	500			http://eol.org/schema/terms/greenish-blue
Lupinus breweri	Fabaceae	Mat Lupine	37.6631	-119.622	2125		Glacier Point RD, .06 miles west of Bridalveil Campground, Yosemite National Park, Mariposa County, California		native	123	101	170	http://eol.org/data_objects/13159947		0.719807	0.405882	0.666667	259.13	41	67	11.9807	492			http://eol.org/schema/terms/purplish-blue
Lupinus breweri	Fabaceae	Mat Lupine	37.6631	-119.622	2125		Glacier Point RD, .06 miles west of Bridalveil Campground, Yosemite National Park, Mariposa County, California		native	164	140	202	http://eol.org/data_objects/13159946		0.731183	0.306931	0.792157	263.226	31	79	13.1183	493			http://eol.org/schema/terms/purplish-blue
Lupinus breweri	Fabaceae	Mat Lupine	37.6631	-119.622	2125		Glacier Point RD, .06 miles west of Bridalveil Campground, Yosemite National Park, Mariposa County, California		native	140	105	164	http://eol.org/data_objects/13159945		0.765537	0.359756	0.643137	275.593	36	64	16.5537	494			http://eol.org/schema/terms/purplish-blue
Hackelia micrantha	Boraginaceae	Jessica Sticktight	37.8598	-119.616	2515		Along the old trail in the meadow near Lukins Lake, rerouted to avoid damage to the meadow in ca. 2009, Tuolumne County, California		native	152	147	177	http://eol.org/data_objects/13262523		0.694444	0.169492	0.694118	250	17	69	9.44444	531			http://eol.org/schema/terms/purplish-blue
Lupinus obtusilobus	Fabaceae	Blunt-lobe Lupine	40.5608	-119.604	1560		Washoe County, Nevada,		native	118	87	111	http://eol.org/data_objects/13264736		0.870968	0.262712	0.462745	313.548	26	46	27.0968	795			http://eol.org/schema/terms/reddish-purple
Lupinus obtusilobus	Fabaceae	Blunt-lobe Lupine	40.5608	-119.604	1560		Washoe County, Nevada,		native	134	96	110	http://eol.org/data_objects/13264735		0.938596	0.283582	0.52549	337.895	28	53	33.8596	794			http://eol.org/schema/terms/reddish-purple
Phlox hoodii subsp. canescens	Polemoniaceae	Hood's Phlox	40.5608	-119.604	1560		Washoe County, Nevada		native	214	175	201	http://eol.org/data_objects/13267185		0.888889	0.182243	0.839216	320	18	84	28.8889	798			http://eol.org/schema/terms/reddish-purple
Sisyrinchium idahoense	Iridaceae	Idaho Blue-eyed-grass	40.5612	-119.604	1560		Washoe, Nevada		native	128	92	156	http://eol.org/data_objects/23795636		0.760417	0.410256	0.611765	273.75	41	61	16.0417	799	Y		http://eol.org/schema/terms/purplish-blue
Lupinus polyphyllus	Fabaceae	Marsh Lupine	40.5608	-119.604	1560		Washoe County, Nevada,		native	177	182	185	http://eol.org/data_objects/13264741		0.5625	0.0432432	0.72549	202.5	4	73	-3.75	797			http://eol.org/schema/terms/greenish-blue
Lupinus polyphyllus	Fabaceae	Marsh Lupine	40.5608	-119.604	1560		Washoe County, Nevada,		native	111	87	127	http://eol.org/data_objects/13264739		0.766667	0.314961	0.498039	276	31	50	16.6667	796			http://eol.org/schema/terms/purplish-blue
Lupinus breweri var. breweri	Fabaceae	Mat Lupine	40.5608	-119.604	1560		Washoe County, Nevada,		native	134	103	154	http://eol.org/data_objects/13264631		0.767974	0.331169	0.603922	276.471	33	60	16.7974	790			http://eol.org/schema/terms/purplish-blue
Lupinus breweri var. breweri	Fabaceae	Mat Lupine	40.5608	-119.604	1560		Washoe County, Nevada,		native	129	93	148	http://eol.org/data_objects/13264632		0.775758	0.371622	0.580392	279.273	37	58	17.5758	791			http://eol.org/schema/terms/purplish-blue
Lupinus nevadensis	Fabaceae	Nevada Lupine	40.5608	-119.604	1560		Washoe County, Nevada		native	104	74	137	http://eol.org/data_objects/13264734		0.746032	0.459854	0.537255	268.571	46	54	14.6032	792			http://eol.org/schema/terms/purplish-blue
Lupinus nevadensis	Fabaceae	Nevada Lupine	40.5608	-119.604	1560		Washoe County, Nevada		native	126	77	142	http://eol.org/data_objects/13264733		0.792308	0.457746	0.556863	285.231	46	56	19.2308	793			http://eol.org/schema/terms/purplish-blue
Iris missouriensis	Iridaceae	Rocky Mountain Iris	40.5608	-119.604	1560		Washoe County, Nevada		native	191	181	179	http://eol.org/data_objects/13263278		0.0277778	0.0628272	0.74902	10	6	75	-57.2222	787			http://eol.org/schema/terms/orangish-red
Lupinus argenteus var. heteranthus	Fabaceae	Silvery Lupine	40.5608	-119.604	1560		Washoe County, Nevada		native	109	92	157	http://eol.org/data_objects/13264605		0.710256	0.414013	0.615686	255.692	41	62	11.0256	788			http://eol.org/schema/terms/purplish-blue
Lupinus argenteus var. meionanthus	Fabaceae	Silvery Lupine	40.5608	-119.604	1560		Washoe County, Nevada		native	166	123	141	http://eol.org/data_objects/13264608		0.930233	0.259036	0.65098	334.884	26	65	33.0233	789			http://eol.org/schema/terms/reddish-purple
Hackelia velutina	Boraginaceae	Velvet Stickseed	37.8168	-119.589	2334		Along the edge of the large meadow near Crane Flat on the west side of Tioga Road, Yosemite National Park, Mariposa County, California		native	89	157	239	http://eol.org/data_objects/13262535		0.591111	0.627615	0.937255	212.8	63	94	-0.888889	524			http://eol.org/schema/terms/greenish-blue
Gilia capitata ssp. mediomontana	Polemoniaceae	Foothill Gilia	37.7412	-119.582	1214		Along Southside Drive in Yosemite Valley, Yosemite National Park, Mariposa County, California		native	197	207	211	http://eol.org/data_objects/13262290		0.547619	0.0663507	0.827451	197.143	7	83	-5.2381	517			http://eol.org/schema/terms/greenish-blue
Lupinus breweri	Fabaceae	Mat Lupine	37.7295	-119.574	2196		Yosemite National Park, Glacier Point, Mariposa County, California		native	38	35	56	http://eol.org/data_objects/12518811		0.690476	0.375	0.219608	248.571	38	22	9.04762	511			http://eol.org/schema/terms/purplish-blue
Lupinus breweri	Fabaceae	Mat Lupine	37.7295	-119.574	2196		Yosemite National Park, Glacier Point, Mariposa County, California		native	49	44	76	http://eol.org/data_objects/12518812		0.692708	0.421053	0.298039	249.375	42	30	9.27083	510			http://eol.org/schema/terms/purplish-blue
Hackelia velutina	Boraginaceae	Velvet Stickseed	37.7295	-119.574	2196		Yosemite National Park, Glacier Point, Mariposa County, California		native	206	176	200	http://eol.org/data_objects/12516343		0.866667	0.145631	0.807843	312	15	81	26.6667	509			http://eol.org/schema/terms/reddish-purple
Lupinus albifrons	Fabaceae	Silver Lupine	37.7299	-119.559	1234		Happy Isles, Yosemite Valley, Mariposa County, California		native	136	125	177	http://eol.org/data_objects/13264559		0.701923	0.293785	0.694118	252.692	29	69	10.1923	512			http://eol.org/schema/terms/purplish-blue
Lupinus polyphyllus	Fabaceae	Marsh Lupine	37.7321	-119.558	1414		Northwest of Island Pass, John Muir Trail, Ansel Adams Wilderness, Inyo NF, Mono County, California		native	138	128	202	http://eol.org/data_objects/13160093		0.689189	0.366337	0.792157	248.108	37	79	8.91892	513			http://eol.org/schema/terms/purplish-blue
Collinsia parviflora	Plantaginaceae	Blue-eyed Mary	37.8651	-119.538	2616		Yosemite Valley, Yosemite National Park, Mariposa County, California		native	91	96	167	http://eol.org/data_objects/13259190	approximate	0.655702	0.45509	0.654902	236.053	46	65	5.57018	538	Y		http://eol.org/schema/terms/greenish-blue
Ceanothus integerrimus	Rhamnaceae	California Lilac	37.8651	-119.538	2616		Yosemite National Park, Mariposa County, California		native	194	197	167	http://eol.org/data_objects/13258343	approximate	0.183333	0.152284	0.772549	66	15	77	-41.6667	537			http://purl.obolibrary.org/obo/PATO_0001941
Polemonium californicum	Polemoniaceae	California Polemonium	37.8651	-119.538	2616		Yosemite National Park, Mariposa/Tuolumne County, California		native	105	86	97	http://eol.org/data_objects/13164620	approximate	0.903509	0.180952	0.411765	325.263	18	41	30.3509	556			http://eol.org/schema/terms/reddish-purple
Gilia capitata ssp. mediomontana	Polemoniaceae	Foothill Gilia	37.8651	-119.538	2616		Yosemite National Park, Mariposa/Tuolumne County, California		native	164	164	167	http://eol.org/data_objects/13156723	approximate	0.666667	0.0179641	0.654902	240	2	65	6.66667	542			http://purl.obolibrary.org/obo/PATO_0000318
Sisyrinchium idahoense	Iridaceae	Idaho Blue-eyed-grass	37.8651	-119.538	2616		Yosemite National Park, Tuolumne County, California		native	154	114	183	http://eol.org/data_objects/13269531	approximate	0.763285	0.377049	0.717647	274.783	38	72	16.3285	557	Y		http://eol.org/schema/terms/purplish-blue
Hackelia micrantha	Boraginaceae	Jessica Sticktight	37.8651	-119.538	2616		Yosemite National Park, Mariposa/Tuolumne County, California		native	156	177	213	http://eol.org/data_objects/13157112	approximate	0.605263	0.267606	0.835294	217.895	27	84	0.526316	544			http://eol.org/schema/terms/greenish-blue
Hackelia micrantha	Boraginaceae	Jessica Sticktight	37.8651	-119.538	2616		Yosemite National Park, Mariposa/Tuolumne County, California		native	182	198	244	http://eol.org/data_objects/13157116	approximate	0.623656	0.254098	0.956863	224.516	25	96	2.36559	543			http://eol.org/schema/terms/greenish-blue
Camassia leichtlinii subsp. suksdorfii	Asparagaceae	Large Camas	37.8651	-119.538	2616		Yosemite National Park, Mariposa/Tuolumne County, California, US		native	140	136	217	http://eol.org/data_objects/13149247	approximate	0.674897	0.373272	0.85098	242.963	37	85	7.48971	536			http://eol.org/schema/terms/purplish-blue
Camassia leichtlinii subsp. suksdorfii	Asparagaceae	Large Camas	37.8651	-119.538	2616		Yosemite National Park, Mariposa/Tuolumne County, California, US		native	162	156	245	http://eol.org/data_objects/13149245	approximate	0.677903	0.363265	0.960784	244.045	36	96	7.79026	534			http://eol.org/schema/terms/purplish-blue
Camassia leichtlinii subsp. suksdorfii	Asparagaceae	Large Camas	37.8651	-119.538	2616		Yosemite National Park, Mariposa/Tuolumne County, California, US		native	168	152	242	http://eol.org/data_objects/13149246	approximate	0.696296	0.371901	0.94902	250.667	37	95	9.62963	535			http://eol.org/schema/terms/purplish-blue
Delphinium gracilentum	Ranunculaceae	Pine Forest Larkspur	37.8651	-119.538	2616		Yosemite National Park, Mariposa County, California		native	117	129	208	http://eol.org/data_objects/13259993		0.644689	0.4375	0.815686	232.088	44	82	4.46886	533			http://eol.org/schema/terms/greenish-blue
Delphinium gracilentum	Ranunculaceae	Pine Forest Larkspur	37.8651	-119.538	2616		Yosemite National Park, valley, Mariposa County, California		native	53	62	94	http://eol.org/data_objects/12512780	approximate	0.630081	0.43617	0.368627	226.829	44	37	3.00813	540			http://eol.org/schema/terms/greenish-blue
Delphinium gracilentum	Ranunculaceae	Pine Forest Larkspur	37.8651	-119.538	2616		Yosemite National Park, valley, Mariposa County, California		native	68	70	106	http://eol.org/data_objects/12512779	approximate	0.657895	0.358491	0.415686	236.842	36	42	5.78947	539			http://eol.org/schema/terms/greenish-blue
Phacelia quickii	Plantaginaceae	Quick's Scorpionweed	37.8651	-119.538	2616		Yosemite National Park, Mariposa County, California		native	141	138	168	http://eol.org/data_objects/13267070	approximate	0.683333	0.178571	0.658824	246	18	66	8.33333	551			http://eol.org/schema/terms/purplish-blue
Phacelia quickii	Plantaginaceae	Quick's Scorpionweed	37.8651	-119.538	2616		Yosemite National Park, Mariposa/Tuolumne County, California		native	159	155	202	http://eol.org/data_objects/13163317	approximate	0.680851	0.232673	0.792157	245.106	23	79	8.08511	552			http://eol.org/schema/terms/purplish-blue
Phacelia quickii	Plantaginaceae	Quick's Scorpionweed	37.8651	-119.538	2616		Yosemite National Park, Mariposa/Tuolumne County, California		native	156	152	188	http://eol.org/data_objects/13163318	approximate	0.685185	0.191489	0.737255	246.667	19	74	8.51852	553			http://eol.org/schema/terms/purplish-blue
Phacelia quickii	Plantaginaceae	Quick's Scorpionweed	37.8651	-119.538	2616		Yosemite National Park, Mariposa/Tuolumne County, California		native	198	192	245	http://eol.org/data_objects/13163319	approximate	0.685535	0.216327	0.960784	246.792	22	96	8.55346	554			http://eol.org/schema/terms/purplish-blue
Phacelia quickii	Plantaginaceae	Quick's Scorpionweed	37.8651	-119.538	2616		Yosemite National Park, Mariposa/Tuolumne County, California		native	137	128	177	http://eol.org/data_objects/13163320	approximate	0.697279	0.276836	0.694118	251.02	28	69	9.72789	555			http://eol.org/schema/terms/purplish-blue
Iris missouriensis	Iridaceae	Rocky Mountain Iris	37.8651	-119.538	2616		Yosemite National Park, Tuolumne County, California		native	133	141	144	http://eol.org/data_objects/13263285	approximate	0.545455	0.0763889	0.564706	196.364	8	56	-5.45455	548			http://eol.org/schema/terms/greenish-blue
Gentianopsis holopetala	Gentianaceae	Sierra Fringed Gentian	37.8651	-119.538	2616		Yosemite National Park, Mariposa/Tuolumne County, California		native	87	46	151	http://eol.org/data_objects/13156628	approximate	0.731746	0.695364	0.592157	263.429	70	59	13.1746	541			http://eol.org/schema/terms/purplish-blue
Lupinus grayi	Fabaceae	Sierra Lupine	37.8651	-119.538	2616		Yosemite National Park, valley, Mariposa County, California		native	103	80	84	http://eol.org/data_objects/12518842	approximate	0.971014	0.223301	0.403922	349.565	22	40	37.1014	550			http://eol.org/schema/terms/reddish-purple
Lupinus albifrons	Fabaceae	Silver Lupine	37.8651	-119.538	2616		Yosemite National Park, valley, Mariposa County, California		native	129	111	117	http://eol.org/data_objects/12518757	approximate	0.944444	0.139535	0.505882	340	14	51	34.4444	549			http://eol.org/schema/terms/reddish-purple
Hackelia velutina	Boraginaceae	Velvet Stickseed	37.8651	-119.538	2616		Yosemite National Park, Mariposa County, California		native	66	91	130	http://eol.org/data_objects/12516346	approximate	0.601562	0.492308	0.509804	216.562	49	51	0.15625	547			http://eol.org/schema/terms/greenish-blue
Hackelia velutina	Boraginaceae	Velvet Stickseed	37.8651	-119.538	2616		Yosemite National Park, Mariposa County, California		native	142	180	245	http://eol.org/data_objects/13262536	approximate	0.605178	0.420408	0.960784	217.864	42	96	0.517799	545			http://eol.org/schema/terms/greenish-blue
Hackelia velutina	Boraginaceae	Velvet Stickseed	37.8651	-119.538	2616		Yosemite National Park, Mariposa County, California		native	133	149	206	http://eol.org/data_objects/13262537	approximate	0.630137	0.354369	0.807843	226.849	35	81	3.0137	546			http://eol.org/schema/terms/greenish-blue
Polemonium californicum	Polemoniaceae	California Polemonium	37.8469	-119.511	3246		Along the trail up Mt. Hoffmann, Mariposa County, California		native	202	200	241	http://eol.org/data_objects/13267589		0.674797	0.170124	0.945098	242.927	17	95	7.47967	529			http://eol.org/schema/terms/purplish-blue
Lupinus albifrons	Fabaceae	Silver Lupine	33.2465	-119.499	191		San Nicolas Island, Ventura County, California		native	102	90	130	http://eol.org/data_objects/17786317		0.716667	0.307692	0.509804	258	31	51	11.6667	238			http://eol.org/schema/terms/purplish-blue
Lupinus covillei	Fabaceae	Coville's Lupine	37.853	-119.447	2984	x	Eastern lower slopes of Polly Dome, Tuolumne County, California		native	115	116	178	http://eol.org/data_objects/13264668		0.664021	0.353933	0.698039	239.048	35	70	6.40212	530			http://eol.org/schema/terms/greenish-blue
Gilia capitata ssp. staminea	Polemoniaceae	Bluehead Gilia	34.8571	-119.406	1350		Ballinger Canyon, shortly NE of campground, Santa Barbara County, California		native	133	137	182	http://eol.org/data_objects/13156725		0.653061	0.269231	0.713725	235.102	27	71	5.30612	306	Y		http://eol.org/schema/terms/greenish-blue
Mertensia oblongifolia	Boraginaceae	Spindleroot Bluebells	38.4405	-119.363	2970	x	Along the eastern edge of Lobdell Lake, Sweetwater Mountains, Mono County, California		native	133	170	244	http://eol.org/data_objects/18593167		0.611111	0.454918	0.956863	22	45	96	1.11111	632	Y		http://eol.org/schema/terms/orangish-red
Mertensia oblongifolia	Boraginaceae	Spindleroot Bluebells	38.4405	-119.363	2970	x	Along the eastern edge of Lobdell Lake, Sweetwater Mountains, Mono County, California		native	120	156	232	http://eol.org/data_objects/18593166		0.613095	0.482759	0.909804	220.714	48	91	1.30952	631	Y		http://eol.org/schema/terms/greenish-blue
Gentianopsis holopetala	Gentianaceae	Sierra Fringed Gentian	37.1132	-119.313	1689		River Trail, Ansel Adams Wilderness, Madera, CA		native	109	75	177	http://eol.org/data_objects/24798770		0.722222	0.576271	0.694118	260	58	69	12.2222	442			http://eol.org/schema/terms/purplish-blue
Lupinus covillei	Fabaceae	Coville's Lupine	37.9092	-119.286	3069	x	Along the trail to Lower Gaylor Lake, Tuolumne County, California,		native	80	100	162	http://eol.org/data_objects/13264672		0.626016	0.506173	0.635294	225.366	51	64	2.60163	576			http://eol.org/schema/terms/greenish-blue
Lupinus covillei	Fabaceae	Coville's Lupine	37.9092	-119.286	3069	x	Along the trail to Lower Gaylor Lake, Tuolumne County, California,		native	55	76	153	http://eol.org/data_objects/13264669		0.630952	0.640523	0.6	227.143	64	60	3.09524	573			http://eol.org/schema/terms/greenish-blue
Lupinus covillei	Fabaceae	Coville's Lupine	37.9092	-119.286	3069	x	Along the trail to Lower Gaylor Lake, Tuolumne County, California,		native	86	102	181	http://eol.org/data_objects/13264671		0.638596	0.524862	0.709804	229.895	52	71	3.85965	575			http://eol.org/schema/terms/greenish-blue
Lupinus covillei	Fabaceae	Coville's Lupine	37.9092	-119.286	3069	x	Along the trail to Lower Gaylor Lake, Tuolumne County, California,		native	94	104	202	http://eol.org/data_objects/13264670		0.651235	0.534653	0.792157	234.444	53	79	5.12346	574			http://eol.org/schema/terms/greenish-blue
Hackelia micrantha	Boraginaceae	Jessica Sticktight	37.9092	-119.286	3069	x	Along the trail up Gaylor Ridge, Tuolumne County, California		native	147	161	189	http://eol.org/data_objects/13262522		0.611111	0.222222	0.741176	22	22	74	1.11111	572			http://eol.org/schema/terms/orangish-red
Iris missouriensis	Iridaceae	Rocky Mountain Iris	37.9662	-119.272	3085	x	Saddlebag Lake, Mono County, California		native	122	126	137	http://eol.org/data_objects/12517261		0.622222	0.109489	0.537255	224	11	54	2.22222	586			http://eol.org/schema/terms/greenish-blue
Lupinus breweri var. bryoides	Fabaceae	Mat Lupine	37.9171	-119.269	3156		In the Gaylor Lakes Basin above Middle Gaylor Lake, Tuolumne County, California		native	106	87	118	http://eol.org/data_objects/13264640		0.768817	0.262712	0.462745	276.774	26	46	16.8817	580			http://eol.org/schema/terms/purplish-blue
Gentianopsis holopetala	Gentianaceae	Sierra Fringed Gentian	37.9106	-119.258	3229	x	Tioga Pass, California		native	153	132	151	http://eol.org/data_objects/12515780		0.849206	0.137255	0.6	305.714	14	60	24.9206	577			http://eol.org/schema/terms/reddish-purple
Lupinus breweri var. breweri	Fabaceae	Mat Lupine	37.8935	-119.255	2974	x	Along Tioga Road at Dana Meadows, Tuolumne County, California		native	150	145	207	http://eol.org/data_objects/13264634		0.680108	0.299517	0.811765	244.839	30	81	8.01075	566			http://eol.org/schema/terms/purplish-blue
Lupinus breweri var. breweri	Fabaceae	Mat Lupine	37.8935	-119.255	2974	x	Along Tioga Road at Dana Meadows, Tuolumne County, California		native	91	87	121	http://eol.org/data_objects/13264636		0.686275	0.280992	0.47451	247.059	28	47	8.62745	564			http://eol.org/schema/terms/purplish-blue
Lupinus breweri var. breweri	Fabaceae	Mat Lupine	37.8935	-119.255	2974	x	Along Tioga Road at Dana Meadows, Tuolumne County, California		native	154	141	201	http://eol.org/data_objects/13264635		0.702778	0.298507	0.788235	253	30	79	10.2778	565			http://eol.org/schema/terms/purplish-blue
Iris missouriensis	Iridaceae	Rocky Mountain Iris	37.9558	-119.255	3199	x	Along the trail near Gardisky Lake, Mono County, California		native	121	113	149	http://eol.org/data_objects/13263283		0.703704	0.241611	0.584314	253.333	24	58	10.3704	585			http://eol.org/schema/terms/purplish-blue
Gentianopsis holopetala	Gentianaceae	Sierra Fringed Gentian	37.9289	-119.246	3018	x	Meadow along the trail to Bennettville out of Junction Campground, Mono County, California		native	110	24	183	http://eol.org/data_objects/13262213	approximate	0.756813	0.868852	0.717647	272.453	87	72	15.6813	584			http://eol.org/schema/terms/purplish-blue
Gentianopsis holopetala	Gentianaceae	Sierra Fringed Gentian	37.9803	-119.236	3227	x	Meadow in Warren Canyon, Mono County, California		native	94	50	177	http://eol.org/data_objects/13262212		0.724409	0.717514	0.694118	260.787	72	69	12.4409	588			http://eol.org/schema/terms/purplish-blue
Linum lewisii	Linaceae	Prairie Flax	37.901	-119.221	3826	x	Near treeline on Mt. Dana, Tuolumne County, California,		native	149	141	166	http://eol.org/data_objects/13264292		0.72	0.150602	0.65098	259.2	15	65	12	570			http://eol.org/schema/terms/purplish-blue
Iris missouriensis	Iridaceae	Rocky Mountain Iris	38.0569	-119.148	2078		Bodie Road, Mono County, California		native	129	116	118	http://eol.org/data_objects/12517262		0.974359	0.100775	0.505882	350.769	10	51	37.4359	597			http://eol.org/schema/terms/reddish-purple
Lupinus nevadensis	Fabaceae	Nevada Lupine	38.4355	-119.103	1776		Sonoma Canyon, Lyon, Nevada		native	80	85	152	http://eol.org/data_objects/17786341		0.655093	0.473684	0.596078	235.833	47	60	5.50926	630			http://eol.org/schema/terms/greenish-blue
Lupinus nevadensis	Fabaceae	Nevada Lupine	38.4355	-119.103	1776		Sonoma Canyon, Lyon, Nevada		native	83	74	147	http://eol.org/data_objects/17786340		0.687215	0.496599	0.576471	247.397	50	58	8.72146	628			http://eol.org/schema/terms/purplish-blue
Lupinus nevadensis	Fabaceae	Nevada Lupine	38.4355	-119.103	1776		Sonoma Canyon, Lyon, Nevada		native	82	73	119	http://eol.org/data_objects/17786342		0.699275	0.386555	0.466667	251.739	39	47	9.92754	629			http://eol.org/schema/terms/purplish-blue
Ceanothus integerrimus	Rhamnaceae	California Lilac	37.6303	-119.033	3353	x	Along Panorama Trail, Yosemite National Park, Mariposa County, California		native	232	234	211	http://eol.org/data_objects/13258342		0.181159	0.0982906	0.917647	65.2174	10	92	-41.8841	485			http://purl.obolibrary.org/obo/PATO_0001941
Lupinus argenteus var. meionanthus	Fabaceae	Silvery Lupine	37.6377	-119.017	3048	x	Minaret Vista, Mammoth Lakes 10000', Mono County, California		native	116	146	189	http://eol.org/data_objects/12518797		0.598174	0.386243	0.741176	215.342	39	74	-0.182648	486			http://eol.org/schema/terms/greenish-blue
Lupinus succulentus	Fabaceae	Succulent Annual Lupine	34.2227	-118.981	36		Conejo Creek, Camarillo, California		native	93	48	140	http://eol.org/data_objects/23365783		0.748188	0.657143	0.54902	269.348	66	55	14.8188	11			http://eol.org/schema/terms/purplish-blue
Gentianopsis holopetala	Gentianaceae	Sierra Fringed Gentian	37.6485	-118.972	2479		Mammonth Lakes, Mono County, California		native	119	64	172	http://eol.org/data_objects/13156623		0.751543	0.627907	0.67451	270.556	63	67	15.1543	487			http://eol.org/schema/terms/purplish-blue
Navarretia pubescens	Polemoniaceae	Downy Navarretia	36.4697	-118.918	287		North America, United States, California, Tulare, Kaweah		native	78	47	126	http://eol.org/data_objects/23393630		0.732068	0.626984	0.494118	263.544	63	49	13.2068	39			http://eol.org/schema/terms/purplish-blue
Collinsia concolor	Plantaginaceae	Chinese Houses	36.4388	-118.905	322		Three Rivers, Tulare County, California		native	135	67	109	http://eol.org/data_objects/12511594		0.897059	0.503704	0.529412	322.941	50	53	29.7059	403			http://eol.org/schema/terms/reddish-purple
Navarretia pubescens	Polemoniaceae	Downy Navarretia	35.4937	-118.86	352		Kern County, California		native	156	121	203	http://eol.org/data_objects/13161508		0.737805	0.403941	0.796078	265.61	40	80	13.7805	330			http://eol.org/schema/terms/purplish-blue
Phacelia tanacetifolia	Plantaginaceae	Self-heal	35.4937	-118.86	352		Kern County, California		native	116	121	163	http://eol.org/data_objects/13163355		0.648936	0.288344	0.639216	233.617	29	64	4.89362	331			http://eol.org/schema/terms/greenish-blue
Lupinus albifrons	Fabaceae	Silver Lupine	34.7768	-118.788	1071		Los Angeles, Southern California, US-CA		native	127	117	172	http://eol.org/data_objects/21951080		0.69697	0.319767	0.67451	250.909	32	67	9.69697	14			http://eol.org/schema/terms/purplish-blue
Lupinus succulentus	Fabaceae	Succulent Annual Lupine	34.3081	-118.76	427		Simi Valley, Ventura, Southern California		native	87	61	156	http://eol.org/data_objects/21940867		0.712281	0.608974	0.611765	256.421	61	61	11.2281	12			http://eol.org/schema/terms/purplish-blue
Hackelia velutina	Boraginaceae	Velvet Stickseed	37.4188	-118.754	3178	x	Trail to Heart Lake, Inyo/Mono County, California		native	92	105	164	http://eol.org/data_objects/13157129		0.636574	0.439024	0.643137	229.167	44	64	3.65741	473			http://eol.org/schema/terms/greenish-blue
Collinsia sparsiflora	Plantaginaceae	Spinster's Blue Eyed Mary	36.5964	-118.733	2288		California, Sequoia National Park, Alta Trail		native	168	170	220	http://eol.org/data_objects/22858626	trailhead	0.660256	0.236364	0.862745	237.692	24	86	6.02564	427	Y		http://eol.org/schema/terms/greenish-blue
Delphinium gracilentum	Ranunculaceae	Pine Forest Larkspur	36.7893	-118.673	1425		Sequoia - Kings Canyon National Park, California		native	142	118	126	http://eol.org/data_objects/12512781		0.944444	0.169014	0.556863	340	17	56	34.4444	433			http://eol.org/schema/terms/reddish-purple
Collinsia sparsiflora	Plantaginaceae	Spinster's Blue Eyed Mary	36.1408	-118.627	1430		California, Sequoia National Park, Sunset Trail		native	211	204	201	http://eol.org/data_objects/22858611	trailhead	0.05	0.0473934	0.827451	18	5	83	-55	387	Y		http://eol.org/schema/terms/orangish-red
Gilia capitata ssp. pedemontana	Polemoniaceae	Bluehead Gilia	36.4508	-118.595	2390		Near Mineral King, Sierra Nevada, California		native	185	160	116	http://eol.org/data_objects/24664224		0.10628	0.372973	0.72549	38.2609	37	73	-49.372	405	Y		http://purl.obolibrary.org/obo/PATO_0001944
Gentianopsis holopetala	Gentianaceae	Sierra Fringed Gentian	36.4508	-118.595	2390		Mineral King, Franklin Lake, Tulare County, California		native	164	130	163	http://eol.org/data_objects/12515779		0.838235	0.207317	0.643137	301.765	21	64	23.8235	404			http://eol.org/schema/terms/reddish-purple
Pholistoma auritum var. auritum	Boraginaceae	Desert Fiesta-flower	36.8879	-118.555	3120	x	Kings Canyon National Park, Fresno County, California,		native	113	103	143	http://eol.org/data_objects/18593316		0.708333	0.27972	0.560784	255	28	56	10.8333	437			http://eol.org/schema/terms/purplish-blue
Lupinus grayi	Fabaceae	Sierra Lupine	36.8879	-118.555	3120	x	Kings Canyon National Park, Fresno County, California		native	114	81	176	http://eol.org/data_objects/18593155		0.724561	0.539773	0.690196	260.842	54	69	12.4561	436			http://eol.org/schema/terms/purplish-blue
Lupinus grayi	Fabaceae	Sierra Lupine	36.8879	-118.555	3120	x	Kings Canyon National Park, Fresno County, California		native	144	116	186	http://eol.org/data_objects/18593154		0.733333	0.376344	0.729412	264	38	73	13.3333	435			http://eol.org/schema/terms/purplish-blue
Iris missouriensis	Iridaceae	Rocky Mountain Iris	38.4343	-118.486	1921		Mineral County, Nevada		native	114	93	114	http://eol.org/data_objects/13263277	approximate	0.833333	0.184211	0.447059	300	18	45	23.3333	625			http://purl.obolibrary.org/obo/PATO_0000321
Lupinus brevicaulis	Fabaceae	Shortstem Lupine	38.4343	-118.486	1921		Mineral County, Nevada		native	68	53	121	http://eol.org/data_objects/13264626	approximate	0.703431	0.561983	0.47451	253.235	56	47	10.3431	626			http://eol.org/schema/terms/purplish-blue
Polemonium pulcherrimum	Polemoniaceae	Showy Jacob's-ladder	38.4343	-118.486	1921		Mineral County, Nevada		native	190	154	201	http://eol.org/data_objects/13267601	approximate	0.794326	0.233831	0.788235	285.957	23	79	19.4326	627			http://eol.org/schema/terms/purplish-blue
Phacelia fremontii	Plantaginaceae		37.6754	-118.461	1793		Inyo/Mono County, California		native	145	101	154	http://eol.org/data_objects/13267007	approximate	0.805031	0.344156	0.603922	289.811	34	60	20.5031	499			http://eol.org/schema/terms/purplish-blue
Lupinus argenteus var. heteranthus	Fabaceae	Silvery Lupine	42.9556	-118.454			Steens Mountain, Harney, Oregon		native	126	108	179	http://eol.org/data_objects/17786328		0.70892	0.396648	0.701961	255.211	40	70	10.892	909			http://eol.org/schema/terms/purplish-blue
Pholistoma racemosum	Boraginaceae	Racemed Pholistoma	33.3879	-118.416	439		Catalina Island, Los Angeles County, California		native	159	166	187	http://eol.org/data_objects/13267234		0.625	0.149733	0.733333	225	15	73	2.5	248			http://eol.org/schema/terms/greenish-blue
Lupinus succulentus	Fabaceae	Succulent Annual Lupine	33.3879	-118.416	439		Catalina Island, Los Angeles County, California		native	119	123	137	http://eol.org/data_objects/13264774		0.62963	0.131387	0.537255	226.667	13	54	2.96296	246			http://eol.org/schema/terms/greenish-blue
Lupinus succulentus	Fabaceae	Succulent Annual Lupine	33.3879	-118.416	439		Catalina Island, Los Angeles County, California		native	146	104	174	http://eol.org/data_objects/13264775		0.766667	0.402299	0.682353	276	40	68	16.6667	247			http://eol.org/schema/terms/purplish-blue
Duranta erecta	Verbenaceae	Golden Dewdrop	34.0919	-118.402	190		Greystone Park NR		introduced	187	157	209	http://eol.org/data_objects/19246168		0.762821	0.248804	0.819608	274.615	25	82	16.2821	281			http://eol.org/schema/terms/purplish-blue
Linanthus parryae	Polemoniaceae	Sandblossoms	35.75	-118.395	967		Short Canyon, Kern County, California		native	122	69	184	http://eol.org/data_objects/23156131		0.743478	0.625	0.721569	267.652	63	72	14.3478	339			http://eol.org/schema/terms/purplish-blue
Linanthus parryae	Polemoniaceae	Sandblossoms	35.75	-118.395	967		Short Canyon, Kern County, California		native	99	45	141	http://eol.org/data_objects/13159391		0.760417	0.680851	0.552941	273.75	68	55	16.0417	340			http://eol.org/schema/terms/purplish-blue
Salvia columbariae	Lamiaceae	California Sage	34.6372	-118.385	1086		Andrade Corner, California		native	207	145	240	http://eol.org/data_objects/24050078		0.775439	0.395833	0.941176	279.158	40	94	17.5439	13			http://eol.org/schema/terms/purplish-blue
Lupinus brevicaulis	Fabaceae	Shortstem Lupine	39.106	-118.35	2241		Sand Springs Range, Churchill, Nevada		native	84	52	171	http://eol.org/data_objects/17747928		0.711485	0.695906	0.670588	256.134	70	67	11.1485	696			http://eol.org/schema/terms/purplish-blue
Lupinus brevicaulis	Fabaceae	Shortstem Lupine	39.106	-118.35	2241		Sand Springs Range, Churchill, Nevada		native	63	32	118	http://eol.org/data_objects/17747927		0.726744	0.728814	0.462745	261.628	73	46	12.6744	695			http://eol.org/schema/terms/purplish-blue
Linanthus parryae	Polemoniaceae	Sandblossoms	37.0956	-118.333	1778		McMurry Meadow, Inyo National Forest, Inyo County, California		native	209	208	182	http://eol.org/data_objects/12518329	approximate	0.160494	0.129187	0.819608	57.7778	13	82	-43.9506	441			http://purl.obolibrary.org/obo/PATO_0001944
Linum lewisii	Linaceae	Prairie Flax	37.5833	-118.268	3703	x	White Mountains, Inyo/Mono County, California		native	165	135	165	http://eol.org/data_objects/13264287		0.833333	0.181818	0.647059	300	18	65	23.3333	482			http://purl.obolibrary.org/obo/PATO_0000321
Pholistoma racemosum	Boraginaceae	Racemed Pholistoma	34.3872	-118.112	1317		Los Angeles County, California, Channel Islands		native	193	209	224	http://eol.org/data_objects/13163553		0.580645	0.138393	0.878431	209.032	14	88	-1.93548	303			http://eol.org/schema/terms/greenish-blue
Pholistoma racemosum	Boraginaceae	Racemed Pholistoma	34.3872	-118.112	1317		Los Angeles County, California, Channel Islands		native	192	205	218	http://eol.org/data_objects/13163552		0.583333	0.119266	0.854902	210	12	85	-1.66667	302			http://eol.org/schema/terms/greenish-blue
Pholistoma racemosum	Boraginaceae	Racemed Pholistoma	34.3872	-118.112	1317		Los Angeles County, California, Channel Islands		native	173	189	209	http://eol.org/data_objects/13163551		0.592593	0.172249	0.819608	213.333	17	82	-0.740741	301			http://eol.org/schema/terms/greenish-blue
Lupinus succulentus	Fabaceae	Succulent Annual Lupine	34.3872	-118.112	1317		Los Angeles County, California		native	121	92	198	http://eol.org/data_objects/13160113		0.712264	0.535354	0.776471	256.415	54	78	11.2264	300			http://eol.org/schema/terms/purplish-blue
Linanthus parryae	Polemoniaceae	Sandblossoms	36.6147	-118.096	1408		Alabama HIlls, Inyo County, California		native	204	184	220	http://eol.org/data_objects/23156130		0.759259	0.163636	0.862745	273.333	16	86	15.9259	431			http://eol.org/schema/terms/purplish-blue
Phacelia tanacetifolia	Plantaginaceae	Self-heal	36.6147	-118.096	1408		Alabama Hills, Inyo County, California,		native	177	160	231	http://eol.org/data_objects/13163349		0.706573	0.307359	0.905882	254.366	31	91	10.6573	432			http://eol.org/schema/terms/purplish-blue
Salvia columbariae	Lamiaceae	California Sage	34.182	-118.094	360		Eaton Canyon, Pasadena		native	173	162	220	http://eol.org/data_objects/25111875		0.698276	0.263636	0.862745	251.379	26	86	9.82759	10			http://eol.org/schema/terms/purplish-blue
Langloisia setosissima	Polemoniaceae	Great Basin Langloisia	36.8335	-118.087	1346		Mazourka Canyon, Inyo National Forest, Inyo County, California		native	140	122	137	http://eol.org/data_objects/12517640		0.861111	0.128571	0.54902	310	13	55	26.1111	434			http://eol.org/schema/terms/reddish-purple
Lupinus flavoculatus	Fabaceae	Yellow-eye Lupine	37.3503	-117.998	1560		Wyman Creek Area, Inyo County, California		native	126	48	200	http://eol.org/data_objects/13264680		0.752193	0.76	0.784314	270.789	76	78	15.2193	469			http://eol.org/schema/terms/purplish-blue
Lupinus flavoculatus	Fabaceae	Yellow-eye Lupine	37.3503	-117.998	1560		Wyman Creek Area, Inyo County, California		native	116	45	157	http://eol.org/data_objects/13264679		0.772321	0.713376	0.615686	278.036	71	62	17.2321	468			http://eol.org/schema/terms/purplish-blue
Linanthus parryae	Polemoniaceae	Sandblossoms	35.3837	-117.975	851		Red Rock Canyon State Park, California,		native	134	102	157	http://eol.org/data_objects/12518326		0.763636	0.350318	0.615686	274.909	35	62	16.3636	327			http://eol.org/schema/terms/purplish-blue
Phacelia fremontii	Plantaginaceae		35.3837	-117.975	851		Red Rock Canyon, Kern County, California		native	109	103	129	http://eol.org/data_objects/12522454		0.705128	0.20155	0.505882	253.846	20	51	10.5128	328			http://eol.org/schema/terms/purplish-blue
Phacelia fremontii	Plantaginaceae		37.2433	-117.963	1993		Lime Hill, Inyo Mountains, near Death Valley, California		native	97	69	133	http://eol.org/data_objects/12522458		0.739583	0.481203	0.521569	266.25	48	52	13.9583	460			http://eol.org/schema/terms/purplish-blue
Linanthus parryae	Polemoniaceae	Sandblossoms	36.021	-117.942	1059		south of Bishop, California, along Highway 395		native	187	162	250	http://eol.org/data_objects/15075496		0.714015	0.352	0.980392	257.045	35	98	11.4015	360			http://eol.org/schema/terms/purplish-blue
Lupinus argenteus var. argenteus	Fabaceae	Silvery Lupine	37.7534	-117.635	1308		Lida-Silver Peak Road, Esmeralda, Nevada		native	126	83	167	http://eol.org/data_objects/13264592		0.751984	0.502994	0.654902	270.714	50	65	15.1984	518			http://eol.org/schema/terms/purplish-blue
Salvia columbariae	Lamiaceae	California Sage	34.2003	-117.573	1853		foothills of the San Gabriel Mountains above Rancho Cucamonga, California		native	166	153	246	http://eol.org/data_objects/5879287	approximate	0.689964	0.378049	0.964706	248.387	38	96	8.99642	296			http://eol.org/schema/terms/purplish-blue
Phacelia tanacetifolia	Plantaginaceae	Self-heal	34.9925	-117.542	756		Near Kramer Junction along Hyw 395, San Bernardino County, California		native	129	92	198	http://eol.org/data_objects/13163352		0.724843	0.535354	0.776471	260.943	54	78	12.4843	312			http://eol.org/schema/terms/purplish-blue
Sisyrinchium montanum	Iridaceae	Strict Blue-eyed-grass	52.1673	-117.431	1671	x	Canada, Alberta, Jasper National Park, Athabasca River opposite Lake Beaufort		native	158	136	157	http://eol.org/data_objects/22729198		0.840909	0.139241	0.619608	302.727	14	62	24.0909	964	Y		http://eol.org/schema/terms/reddish-purple
Sisyrinchium montanum	Iridaceae	Strict Blue-eyed-grass	52.1673	-117.431	1671	x	Canada, Alberta, Jasper National Park, Athabasca River opposite Lake Beaufort		native	168	146	160	http://eol.org/data_objects/22729199		0.893939	0.130952	0.658824	321.818	13	66	29.3939	965	Y		http://eol.org/schema/terms/reddish-purple
Langloisia setosissima	Polemoniaceae	Great Basin Langloisia	36.1064	-117.281	758		Inyo National Forest, Black Canyon, California		native	174	150	198	http://eol.org/data_objects/12517633		0.75	0.242424	0.776471	270	24	78	15	382			http://eol.org/schema/terms/purplish-blue
Phacelia tanacetifolia	Plantaginaceae	Self-heal	34.1349	-117.233	381		Indian Gorge, San Bernardino County, California		native	161	154	219	http://eol.org/data_objects/13163350	all searches place the marker on a highway in san bernadino	0.684615	0.296804	0.858824	246.462	30	86	8.46154	289			http://eol.org/schema/terms/purplish-blue
Phacelia campanularia	Plantaginaceae	Desert Scorpionweed	33.7967	-117.224	440		Perris Hills, Riverside County, California		native	145	101	233	http://eol.org/data_objects/13163147		0.722222	0.566524	0.913725	260	57	91	12.2222	270			http://eol.org/schema/terms/purplish-blue
Eriastrum sapphirinum	Polemoniaceae	Sapphire Woollystar	33.7967	-117.224	440		Perris Hills, Riverside County, California		native	152	149	229	http://eol.org/data_objects/13155057		0.672917	0.349345	0.898039	242.25	35	90	7.29167	269	Y		http://eol.org/schema/terms/purplish-blue
Eriastrum sapphirinum	Polemoniaceae	Sapphire Woollystar	33.7967	-117.224	440		Perris Hills, Riverside County, California		native	159	155	232	http://eol.org/data_objects/13155056		0.675325	0.331897	0.909804	243.117	33	91	7.53247	268	Y		http://eol.org/schema/terms/purplish-blue
Eriastrum sapphirinum	Polemoniaceae	Sapphire Woollystar	33.7967	-117.224	440		Perris Hills, Riverside County, California		native	148	135	215	http://eol.org/data_objects/13155055		0.69375	0.372093	0.843137	249.75	37	84	9.375	267	Y		http://eol.org/schema/terms/purplish-blue
Nemophila pulchella	Boraginaceae	Eastwood's Baby-blue-eyes	33.8633	-117.203	479		Lake Perris State Recreation Area, Riverside County, California		native	130	124	244	http://eol.org/data_objects/13161562		0.675	0.491803	0.956863	243	49	96	7.5	272	Y		http://eol.org/schema/terms/purplish-blue
Phacelia tanacetifolia	Plantaginaceae	Self-heal	33.8633	-117.203	479		Lake Perris SRA, Riverside County, California		native	144	133	210	http://eol.org/data_objects/13163346		0.690476	0.366667	0.823529	248.571	37	82	9.04762	273			http://eol.org/schema/terms/purplish-blue
Nemophila pulchella	Boraginaceae	Eastwood's Baby-blue-eyes	33.7092	-117.197	435		Sun City, Riverside County, California		native	93	90	164	http://eol.org/data_objects/13161563		0.673423	0.45122	0.643137	242.432	45	64	7.34234	260	Y		http://eol.org/schema/terms/purplish-blue
Nemophila pulchella	Boraginaceae	Eastwood's Baby-blue-eyes	33.7092	-117.197	435		Sun City, Riverside County, California		native	56	53	118	http://eol.org/data_objects/13161564		0.674359	0.550847	0.462745	242.769	55	46	7.4359	261	Y		http://eol.org/schema/terms/purplish-blue
Phacelia fremontii	Plantaginaceae		35.8232	-117.15	995		Southern Death Valley, Inyo County, California		native	143	123	160	http://eol.org/data_objects/13267012		0.756757	0.23125	0.627451	272.432	23	63	15.6757	344			http://eol.org/schema/terms/purplish-blue
Lupinus argenteus var. utahensis	Fabaceae	Silvery Lupine	36.2072	-117.092	2902	x	Death Valley National Park, Bennett Peak, Inyo County, California		native	136	139	215	http://eol.org/data_objects/13264588		0.660338	0.367442	0.843137	237.722	37	84	6.03376	390			http://eol.org/schema/terms/greenish-blue
Langloisia setosissima	Polemoniaceae	Great Basin Langloisia	36.5054	-117.079	1332		Death Valley National Monument, Inyo County, California		native	247	239	223	http://eol.org/data_objects/12517639		0.111111	0.097166	0.968627	40	10	97	-48.8889	420			http://purl.obolibrary.org/obo/PATO_0001944
Linum lewisii	Linaceae	Prairie Flax	36.5054	-117.079	1332		Death Valley National Park, Inyo County, California		native	104	112	161	http://eol.org/data_objects/19093758		0.643275	0.354037	0.631373	231.579	35	63	4.32749	421			http://eol.org/schema/terms/greenish-blue
Penstemon palmeri	Plantaginaceae	Scented Beardtongue	36.5054	-117.079	1332		Death Valley National Monument, Inyo County, California,		native	119	108	79	http://eol.org/data_objects/12522261		0.120833	0.336134	0.466667	43.5	34	47	-47.9167	422			http://purl.obolibrary.org/obo/PATO_0001944
Phacelia fremontii	Plantaginaceae		36.5054	-117.079	1332		Death Valley National Monument, Inyo County, California		native	186	151	189	http://eol.org/data_objects/13267008		0.820175	0.201058	0.741176	295.263	20	74	22.0175	423			http://eol.org/schema/terms/purplish-blue
Lupinus breweri	Fabaceae	Mat Lupine	34.1449	-117.07	900		About 5 miles west of Angles Oaks on Highway 38, San Bernardino County, California		native	139	104	177	http://eol.org/data_objects/13159942		0.746575	0.412429	0.694118	268.767	41	69	14.6575	293			http://eol.org/schema/terms/purplish-blue
Lupinus breweri	Fabaceae	Mat Lupine	34.1449	-117.07	900		About 5 miles west of Angles Oaks on Highway 38, San Bernardino County, California		native	131	91	170	http://eol.org/data_objects/13159944		0.751055	0.464706	0.666667	270.38	46	67	15.1055	291			http://eol.org/schema/terms/purplish-blue
Lupinus breweri	Fabaceae	Mat Lupine	34.1449	-117.07	900		About 5 miles west of Angles Oaks on Highway 38, San Bernardino County, California		native	161	95	169	http://eol.org/data_objects/13159943		0.815315	0.43787	0.662745	293.514	44	66	21.5315	292			http://eol.org/schema/terms/purplish-blue
Pholistoma auritum var. auritum	Boraginaceae	Desert Fiesta-flower	32.84	-117.042	86		Mission Dam Historical Site, San Diego County, California		native	117	63	147	http://eol.org/data_objects/17748017		0.77381	0.571429	0.576471	278.571	57	58	17.381	220			http://eol.org/schema/terms/purplish-blue
Pholistoma racemosum	Boraginaceae	Racemed Pholistoma	32.523	-117.012	25		CataviÃ±a, Baja California Norte, Baja California, Mexico		native	119	118	129	http://eol.org/data_objects/22369585		0.681818	0.0852713	0.505882	245.455	9	51	8.18182	217			http://eol.org/schema/terms/purplish-blue
Sisyrinchium idahoense	Iridaceae	Idaho Blue-eyed-grass	46.7324	-117	789		Moscow, ID		native	126	119	204	http://eol.org/data_objects/9906913		0.680392	0.416667	0.8	244.941	42	80	8.03922	942	Y		http://eol.org/schema/terms/purplish-blue
Eriastrum pluriflorum	Polemoniaceae	Tehachapi Woollystar	34.2327	-116.948	2153		Big Bear Valley, San Bernardino County, California		native	136	132	202	http://eol.org/data_objects/13155051	approximate	0.67619	0.346535	0.792157	243.429	35	79	7.61905	297			http://eol.org/schema/terms/purplish-blue
Eriastrum pluriflorum	Polemoniaceae	Tehachapi Woollystar	34.2327	-116.948	2153		Big Bear Valley, San Bernardino County, California. Within 100 yards of Native mortar holes on North side of lake		native	132	144	219	http://eol.org/data_objects/13155050		0.643678	0.39726	0.858824	231.724	40	86	4.36782	298			http://eol.org/schema/terms/greenish-blue
Eriastrum sapphirinum	Polemoniaceae	Sapphire Woollystar	33.34	-116.906	1467		Palomar Mountain State Park, San Diego County, California		native	133	158	199	http://eol.org/data_objects/23598231		0.603535	0.331658	0.780392	217.273	33	78	0.353535	241	Y		http://eol.org/schema/terms/greenish-blue
Eriastrum sapphirinum	Polemoniaceae	Sapphire Woollystar	33.34	-116.906	1467		Palomar Mountain State Park, San Diego County, California		native	153	180	231	http://eol.org/data_objects/23598233		0.608974	0.337662	0.905882	219.231	34	91	0.897436	242	Y		http://eol.org/schema/terms/greenish-blue
Hackelia velutina	Boraginaceae	Velvet Stickseed	42.2516	-116.892	1442		Butano State Park, San Mateo County, California		native	79	90	131	http://eol.org/data_objects/12516344		0.63141	0.396947	0.513725	227.308	40	51	3.14103	858			http://eol.org/schema/terms/greenish-blue
Eriastrum pluriflorum	Polemoniaceae	Tehachapi Woollystar	34.1753	-116.867	1933		Near Angles Oaks along Hwy 38, San Bernardino County, California		native	105	98	135	http://eol.org/data_objects/13155054		0.698198	0.274074	0.529412	251.351	27	53	9.81982	295			http://eol.org/schema/terms/purplish-blue
Eriastrum pluriflorum	Polemoniaceae	Tehachapi Woollystar	34.1753	-116.867	1933		Near Angles Oaks along Hwy 38, San Bernardino County, California		native	125	114	153	http://eol.org/data_objects/13155052		0.713675	0.254902	0.6	256.923	25	60	11.3675	294			http://eol.org/schema/terms/purplish-blue
Eriastrum sapphirinum	Polemoniaceae	Sapphire Woollystar	33.8736	-116.837	1193		McMullin Flat, Riverside County, California		native	67	72	169	http://eol.org/data_objects/13260856		0.658497	0.60355	0.662745	237.059	60	66	5.84967	274	Y		http://eol.org/schema/terms/greenish-blue
Langloisia setosissima	Polemoniaceae	Great Basin Langloisia	34.9319	-116.819	844		California, 2 mi N of Yermo		native	115	108	111	http://eol.org/data_objects/22729990		0.928571	0.0608696	0.45098	334.286	6	45	32.8571	307			http://eol.org/schema/terms/reddish-purple
Eriastrum sapphirinum	Polemoniaceae	Sapphire Woollystar	32.8351	-116.766	578		Alpine, San Diego County, California., San Diego, California		native	207	182	134	http://eol.org/data_objects/22479262		0.109589	0.352657	0.811765	39.4521	35	81	-49.0411	219	Y		http://purl.obolibrary.org/obo/PATO_0001944
Eriastrum sapphirinum	Polemoniaceae	Sapphire Woollystar	33.7465	-116.712	1650		Garner Valley, Riverside County, California		native	164	187	217	http://eol.org/data_objects/13260855	approximate	0.59434	0.24424	0.85098	213.962	24	85	-0.566038	266	Y		http://eol.org/schema/terms/greenish-blue
Eriastrum sapphirinum	Polemoniaceae	Sapphire Woollystar	33.7465	-116.712	1650		Garner Valley, Riverside County, California		native	107	151	210	http://eol.org/data_objects/13260854	approximate	0.595469	0.490476	0.823529	214.369	49	82	-0.453074	265	Y		http://eol.org/schema/terms/greenish-blue
Eriastrum sapphirinum	Polemoniaceae	Sapphire Woollystar	33.7465	-116.712	1650		Garner Valley, Riverside County, California		native	100	99	151	http://eol.org/data_objects/13260853	approximate	0.669872	0.344371	0.592157	241.154	34	59	6.98718	264	Y		http://eol.org/schema/terms/purplish-blue
Trichostema parishii	Lamiaceae	Parish's Bluecurls	32.9845	-116.677	895		Three Sisters Falls Trail near Julian, San Diego County, California		native	146	139	224	http://eol.org/data_objects/23373850		0.680392	0.379464	0.878431	244.941	38	88	8.03922	225	Y		http://eol.org/schema/terms/purplish-blue
Trichostema parishii	Lamiaceae	Parish's Bluecurls	32.9845	-116.677	895		Three Sisters Falls Trail near Julian, San Diego County, California		native	169	156	237	http://eol.org/data_objects/23373849		0.693416	0.341772	0.929412	249.63	34	93	9.34156	224	Y		http://eol.org/schema/terms/purplish-blue
Salvia columbariae	Lamiaceae	California Sage	37.5833	-116.667	720		Whitewater Preserve, CA		native	113	121	221	http://eol.org/data_objects/23848652		0.654321	0.488688	0.866667	235.556	49	87	5.4321	483			http://eol.org/schema/terms/greenish-blue
Salvia columbariae	Lamiaceae	California Sage	33.7975	-116.512	121		Palm Canyon, California		native	133	117	228	http://eol.org/data_objects/17474291		0.690691	0.486842	0.894118	248.649	49	89	9.06907	271			http://eol.org/schema/terms/purplish-blue
Phacelia campanularia	Plantaginaceae	Desert Scorpionweed	33.588	-116.499	1186		Palm Canyon trail in Anza-Borrego Desert State Park, San Diego County, California		native	69	100	195	http://eol.org/data_objects/13266976		0.625661	0.646154	0.764706	225.238	65	76	2.56614	258			http://eol.org/schema/terms/greenish-blue
Pholistoma auritum var. arizonicum	Boraginaceae	Desert Fiesta-flower	32.9978	-116.448	664		Rainbow canyon, Anza-Borrego SP, San Diego County, California,		native	143	122	189	http://eol.org/data_objects/17766982		0.718905	0.354497	0.741176	258.806	35	74	11.8905	226			http://eol.org/schema/terms/purplish-blue
Lupinus sparsiflorus	Fabaceae	Mohave Lupine	33.523	-116.426	2619		San Jacinto, Santa Rosa Mountains. Riverside County, California		native	86	82	183	eol.org/data_objects/23356657		0.673267	0.551913	0.717647	242.376	55	72	7.32673	253			http://eol.org/schema/terms/purplish-blue
Lupinus sparsiflorus	Fabaceae	Mohave Lupine	33.523	-116.426	2619		San Jacinto, Santa Rosa Mountains. Riverside County, California		native	121	101	244	http://eol.org/data_objects/23356656		0.689977	0.586066	0.956863	248.392	59	96	8.99767	252			http://eol.org/schema/terms/purplish-blue
Trichostema parishii	Lamiaceae	Parish's Bluecurls	33.523	-116.426	2619		San Jacinto, Santa Rosa Mountains. Riverside County, California		native	109	80	196	http://eol.org/data_objects/22945095		0.708333	0.591837	0.768627	255	59	77	10.8333	256	Y		http://eol.org/schema/terms/purplish-blue
Trichostema parishii	Lamiaceae	Parish's Bluecurls	33.523	-116.426	2619		San Jacinto, Santa Rosa Mountains. Riverside County, California		native	111	77	207	http://eol.org/data_objects/23356683		0.710256	0.628019	0.811765	255.692	63	81	11.0256	257	Y		http://eol.org/schema/terms/purplish-blue
Trichostema parishii	Lamiaceae	Parish's Bluecurls	33.523	-116.426	2619		San Jacinto, Santa Rosa Mountains. Riverside County, California		native	94	66	122	http://eol.org/data_objects/22945094		0.75	0.459016	0.478431	270	46	48	15	255	Y		http://eol.org/schema/terms/purplish-blue
Lupinus hyacinthinus	Fabaceae	San Jacinto Lupine	33.523	-116.426	2619		San Jacinto, Santa Rosa Mountains. Riverside County, California		native	169	156	208	http://eol.org/data_objects/23356653		0.708333	0.25	0.815686	255	25	82	10.8333	249			http://eol.org/schema/terms/purplish-blue
Lupinus hyacinthinus	Fabaceae	San Jacinto Lupine	33.523	-116.426	2619		San Jacinto, Santa Rosa Mountains. Riverside County, California		native	183	139	225	http://eol.org/data_objects/23356655		0.751938	0.382222	0.882353	270.698	38	88	15.1938	251			http://eol.org/schema/terms/purplish-blue
Lupinus hyacinthinus	Fabaceae	San Jacinto Lupine	33.523	-116.426	2619		San Jacinto, Santa Rosa Mountains. Riverside County, California		native	192	153	225	http://eol.org/data_objects/23356654		0.756944	0.32	0.882353	272.5	32	88	15.6944	250			http://eol.org/schema/terms/purplish-blue
Psorothamnus schottii	Fabaceae	Schott's Smokebush	33.523	-116.426	2619		San Jacinto, Santa Rosa Mountains. Riverside County		native	38	25	75	http://eol.org/data_objects/22944693		0.71	0.666667	0.294118	255.6	67	29	11	254			http://eol.org/schema/terms/purplish-blue
Phacelia campanularia	Plantaginaceae	Desert Scorpionweed	34.9592	-116.419	578		San Bernardino County, California		native	53	60	182	http://eol.org/data_objects/23156167		0.657623	0.708791	0.713725	236.744	71	71	5.76227	310			http://eol.org/schema/terms/greenish-blue
Langloisia setosissima	Polemoniaceae	Great Basin Langloisia	34.9592	-116.419	578		San Bernardino County		native	200	180	215	http://eol.org/data_objects/23156121		0.761905	0.162791	0.843137	274.286	16	84	16.1905	308			http://eol.org/schema/terms/purplish-blue
Nemophila menziesii	Boraginaceae	Menzies' Baby-blue-eyes	34.9592	-116.419	578		San Bernardino County, California		native	144	169	248	http://eol.org/data_objects/13161543		0.626603	0.419355	0.972549	225.577	42	97	2.66026	309	Y		http://eol.org/schema/terms/greenish-blue
Phacelia tanacetifolia	Plantaginaceae	Self-heal	34.9592	-116.419	578		San Bernardino County, California		native	172	154	206	http://eol.org/data_objects/13163353		0.724359	0.252427	0.807843	260.769	25	81	12.4359	311			http://eol.org/schema/terms/purplish-blue
Psorothamnus schottii	Fabaceae	Schott's Smokebush	33.2559	-116.375	196		Borrego Springs, San Diego County, California		native	107	46	161	http://eol.org/data_objects/13165275		0.755072	0.714286	0.631373	271.826	71	63	15.5072	240			http://eol.org/schema/terms/purplish-blue
Phacelia tanacetifolia	Plantaginaceae	Self-heal	33.2559	-116.375	196		Borrego Springs, Imperial/San Diego County, California		native	167	161	218	http://eol.org/data_objects/13163348		0.684211	0.261468	0.854902	246.316	26	85	8.42105	239			http://eol.org/schema/terms/purplish-blue
Phacelia campanularia	Plantaginaceae	Desert Scorpionweed	33.1005	-116.301	593		Anza Borrego Headquarters, San Diego County, California		native	109	98	138	http://eol.org/data_objects/12522419	general park coordinates	0.7125	0.289855	0.541176	256.5	29	54	11.25	228			http://eol.org/schema/terms/purplish-blue
Phacelia campanularia	Plantaginaceae	Desert Scorpionweed	33.1005	-116.301	593		Anza Borrego State Park, San Diego County, California		native	157	88	227	http://eol.org/data_objects/13266974		0.7494	0.612335	0.890196	269.784	61	89	14.94	229			http://eol.org/schema/terms/purplish-blue
Langloisia setosissima	Polemoniaceae	Great Basin Langloisia	33.1005	-116.301	593		Anza Borrego, South Fork of Palm Wash, San Diego County, California		native	160	157	199	http://eol.org/data_objects/13158750	general park coordinates	0.678571	0.211055	0.780392	244.286	21	78	7.85714	227			http://eol.org/schema/terms/purplish-blue
Psorothamnus schottii	Fabaceae	Schott's Smokebush	33.1005	-116.301	593		Anza Borrego Desert State Park, San Diego County, California		native	71	55	96	http://eol.org/data_objects/12524363		0.731707	0.427083	0.376471	263.415	43	38	13.1707	230			http://eol.org/schema/terms/purplish-blue
Psorothamnus schottii	Fabaceae	Schott's Smokebush	33.1005	-116.301	593		Anza Borrego State Park, San Diego County, California		native	77	84	160	http://eol.org/data_objects/21928478		0.65261	0.51875	0.627451	234.94	52	63	5.26104	231			http://eol.org/schema/terms/greenish-blue
Psorothamnus schottii	Fabaceae	Schott's Smokebush	33.1005	-116.301	593		Anza Borrego State Park, San Diego County, California		native	65	58	164	http://eol.org/data_objects/21928476		0.677673	0.646341	0.643137	243.962	65	64	7.7673	232			http://eol.org/schema/terms/purplish-blue
Psorothamnus schottii	Fabaceae	Schott's Smokebush	33.1005	-116.301	593		Anza-Borrego Desert State Park, San Diego County, California		native	71	69	153	http://eol.org/data_objects/13268003		0.670635	0.54902	0.6	241.429	55	60	7.06349	233			http://eol.org/schema/terms/purplish-blue
Psorothamnus schottii	Fabaceae	Schott's Smokebush	33.1005	-116.301	593		Anza-Borrego Desert State Park, San Diego County, California		native	41	34	103	http://eol.org/data_objects/21928477		0.683575	0.669903	0.403922	246.087	67	40	8.35749	234			http://eol.org/schema/terms/purplish-blue
Lupinus flavoculatus	Fabaceae	Yellow-eye Lupine	35.972	-116.273	813		Hwy 178, WildRose Road, Death Valley National Park, Inyo County, California		native	68	25	128	http://eol.org/data_objects/13159979		0.736246	0.804688	0.501961	265.049	80	50	13.6246	358			http://eol.org/schema/terms/purplish-blue
Linanthus parryae	Polemoniaceae	Sandblossoms	35.9318	-116.228	747		Central and western Mojave and vicinity, San Bernardino County, California		native	128	97	104	http://eol.org/data_objects/12518322		0.962366	0.242188	0.501961	346.452	24	50	36.2366	356			http://eol.org/schema/terms/reddish-purple
Linanthus parryae	Polemoniaceae	Sandblossoms	35.9322	-116.228	747		Mojave Desert, CA		native	191	155	198	http://eol.org/data_objects/15075498		0.806202	0.217172	0.776471	290.233	22	78	20.6202	357			http://eol.org/schema/terms/purplish-blue
Phacelia campanularia	Plantaginaceae	Desert Scorpionweed	34.1356	-116.054	606		Mojave Desert, Twentynine Palms, San Bernardino County, California,		native	37	37	83	http://eol.org/data_objects/12522416		0.666667	0.554217	0.32549	240	55	33	6.66667	290			http://purl.obolibrary.org/obo/PATO_0000318
Psorothamnus schottii	Fabaceae	Schott's Smokebush	34.1296	-116.037	768		Colorado Desert, Riverside County, California		native	36	18	56	http://eol.org/data_objects/12524361		0.745614	0.678571	0.219608	268.421	68	22	14.5614	288			http://eol.org/schema/terms/purplish-blue
Salvia columbariae	Lamiaceae	California Sage	34.1293	-116.037	602		Joshua Tree National Park, California		native	106	112	216	http://eol.org/data_objects/24657523		0.657576	0.509259	0.847059	236.727	51	85	5.75758	287			http://eol.org/schema/terms/greenish-blue
Phacelia campanularia	Plantaginaceae	Desert Scorpionweed	34.1293	-116.037	602		Joshua Tree National Monument, Riverside County, California		native	53	36	77	http://eol.org/data_objects/12522415		0.735772	0.532468	0.301961	264.878	53	30	13.5772	284			http://eol.org/schema/terms/purplish-blue
Phacelia campanularia	Plantaginaceae	Desert Scorpionweed	34.1293	-116.037	602		Joshua Tree National Park, San Bernardino County, California,		native	5	58	195	http://eol.org/data_objects/15998094		0.620175	0.974359	0.764706	223.263	97	76	2.01754	285			http://eol.org/schema/terms/greenish-blue
Langloisia setosissima	Polemoniaceae	Great Basin Langloisia	34.1293	-116.037	602		Joshua Tree National Park, Riverside County, California		native	128	115	145	http://eol.org/data_objects/13158748		0.738889	0.206897	0.568627	266	21	57	13.8889	282			http://eol.org/schema/terms/purplish-blue
Lupinus sparsiflorus	Fabaceae	Mohave Lupine	34.1293	-116.037	602		Joshua Tree National Monument, Riverside County, California		native	127	99	118	http://eol.org/data_objects/12518927		0.886905	0.220472	0.498039	319.286	22	50	28.6905	283			http://eol.org/schema/terms/reddish-purple
Phacelia fremontii	Plantaginaceae		34.1293	-116.037	602		Joshua Tree National Monument, Riverside County, California		native	134	105	128	http://eol.org/data_objects/12522453		0.867816	0.216418	0.52549	312.414	22	53	26.7816	286			http://eol.org/schema/terms/reddish-purple
Penstemon palmeri	Plantaginaceae	Scented Beardtongue	35.7841	-115.902	1531		Kingston Mountains, Inyo/San Bernardino County, California		native	196	160	144	http://eol.org/data_objects/12522256		0.0512821	0.265306	0.768627	18.4615	27	77	-54.8718	341			http://eol.org/schema/terms/orangish-red
Phacelia campanularia	Plantaginaceae	Desert Scorpionweed	33.6914	-115.803	640		Joshua Tree National Monument, Cottonwood Springs, Riverside County, California		native	8	15	85	http://eol.org/data_objects/12522418	approximate	0.651515	0.905882	0.333333	234.545	91	33	5.15152	259			http://eol.org/schema/terms/greenish-blue
Langloisia setosissima	Polemoniaceae	Great Basin Langloisia	35.6616	-115.717	747		Eastern Mojave, San Bernardino County, California		native	127	97	109	http://eol.org/data_objects/12517637		0.933333	0.23622	0.498039	336	24	50	33.3333	333			http://eol.org/schema/terms/reddish-purple
Lupinus sparsiflorus	Fabaceae	Mohave Lupine	35.6616	-115.717	747		Eastern Mojave, San Bernardino County, California		native	101	93	121	http://eol.org/data_objects/12518926	approximate	0.714286	0.231405	0.47451	257.143	23	47	11.4286	334			http://eol.org/schema/terms/purplish-blue
Phacelia fremontii	Plantaginaceae		35.6616	-115.717	747		Eastern Mojave, San Bernardino County, California		native	102	88	102	http://eol.org/data_objects/12522452		0.833333	0.137255	0.4	300	14	40	23.3333	335			http://purl.obolibrary.org/obo/PATO_0000321
Lupinus argenteus	Fabaceae	Silvery Lupine	36.3084	-115.661	2900	x	North Loop trail east of Mummy Mountain, Spring Mountains, southern Nevada		native	102	97	140	http://eol.org/data_objects/17477146		0.686047	0.307143	0.54902	246.977	31	55	8.60465	399			http://eol.org/schema/terms/purplish-blue
Campanula rotundifolia	Campanulaceae	Harebell	51.1784	-115.571	1402	x	Banff, Paradise Valley		native	62	67	116	http://eol.org/data_objects/12509773		0.651235	0.465517	0.454902	234.444	47	45	5.12346	960			http://eol.org/schema/terms/greenish-blue
Langloisia setosissima	Polemoniaceae	Great Basin Langloisia	35.011	-115.473	1410		Mojave National Preserve, San Bernardino County, California		native	159	152	151	http://eol.org/data_objects/13158749		0.0208333	0.0503145	0.623529	7.5	5	62	-57.9167	313			http://eol.org/schema/terms/orangish-red
Penstemon palmeri	Plantaginaceae	Scented Beardtongue	35.011	-115.473	1410		Mojave National Preserve, San Bernardino County, California,		native	184	155	150	http://eol.org/data_objects/12522262		0.0245098	0.184783	0.721569	8.82353	18	72	-57.549	314			http://eol.org/schema/terms/orangish-red
Phacelia fremontii	Plantaginaceae		35.011	-115.473	1410		Mojave National Preserve, California		native	196	141	192	http://eol.org/data_objects/12522457		0.845455	0.280612	0.768627	304.364	28	77	24.5455	315			http://eol.org/schema/terms/reddish-purple
Salvia columbariae	Lamiaceae	California Sage	36.1239	-115.473	1200		Pine Creek Canyon east of the old homestead, Red Rock Canyon, Spring Mountains, southern Nevada		native	92	73	122	http://eol.org/data_objects/17474290		0.731293	0.401639	0.478431	263.265	40	48	13.1293	386			http://eol.org/schema/terms/purplish-blue
Lupinus brevicaulis	Fabaceae	Shortstem Lupine	35.8339	-115.454	1282		The Sump, Esmeralda, Nevada		native	96	31	140	http://eol.org/data_objects/13264629		0.766055	0.778571	0.54902	275.78	78	55	16.6055	345			http://eol.org/schema/terms/purplish-blue
Penstemon palmeri	Plantaginaceae	Scented Beardtongue	36.1111	-115.45	1162		Red Rock Canyon National Conservation Area, Nevada		native	165	150	169	http://eol.org/data_objects/12522247		0.798246	0.112426	0.662745	287.368	11	66	19.8246	383			http://eol.org/schema/terms/purplish-blue
Penstemon palmeri	Plantaginaceae	Scented Beardtongue	36.2947	-115.445	1333		Kyle Canyon, Spring Mountains, southern Nevada		native	161	99	152	http://eol.org/data_objects/17472751		0.857527	0.385093	0.631373	308.71	39	63	25.7527	395			http://eol.org/schema/terms/reddish-purple
Psorothamnus schottii	Fabaceae	Schott's Smokebush	33.7133	-115.4	277		near Desert Center, Riverside County, California		native	113	95	175	http://eol.org/data_objects/21928496		0.704167	0.457143	0.686275	253.5	46	69	10.4167	262			http://eol.org/schema/terms/purplish-blue
Psorothamnus schottii	Fabaceae	Schott's Smokebush	33.7133	-115.4	277		near Desert Center, Riverside County, California		native	158	121	245	http://eol.org/data_objects/21928499		0.716398	0.506122	0.960784	257.903	51	96	11.6398	263			http://eol.org/schema/terms/purplish-blue
Phlox hoodii	Polemoniaceae	Hood's Phlox	41.222	-115.284	2102	x	Elko County, Nevada		native	215	208	223	http://eol.org/data_objects/23862333	approximate	0.744444	0.0672646	0.87451	268	7	87	14.4444	819			http://eol.org/schema/terms/purplish-blue
Phlox hoodii	Polemoniaceae	Hood's Phlox	42.4333	-115.211	1393		Jarbidge Resource Area.		native	211	216	224	http://eol.org/data_objects/1390073		0.602564	0.0580357	0.878431	216.923	6	88	0.25641	882			http://eol.org/schema/terms/greenish-blue
Phlox hoodii subsp. canescens	Polemoniaceae	Hood's Phlox	42.4333	-115.211	1393		Jarbidge Resource Area.		native	180	185	198	http://eol.org/data_objects/1390075	approximate	0.62037	0.0909091	0.776471	223.333	9	78	2.03704	883			http://eol.org/schema/terms/greenish-blue
Penstemon palmeri	Plantaginaceae	Scented Beardtongue	36.0796	-115.094	1127		Clark, Nevada		native	174	109	126	http://eol.org/data_objects/13266775		0.95641	0.373563	0.682353	344.308	37	68	35.641	376			http://eol.org/schema/terms/reddish-purple
Sisyrinchium idahoense	Iridaceae	Idaho Blue-eyed-grass	43.5094	-114.824	2385	x	Camas County, Idaho		native	120	105	160	http://eol.org/data_objects/13269528	Camas	0.712121	0.34375	0.627451	256.364	34	63	11.2121	935	Y		http://eol.org/schema/terms/purplish-blue
Linum lewisii	Linaceae	Prairie Flax	43.5094	-114.824	2385	x	Camas County, Idaho,		native	157	159	210	http://eol.org/data_objects/13264291	Camas	0.660377	0.252381	0.823529	237.736	25	82	6.03774	934			http://eol.org/schema/terms/greenish-blue
Lupinus sparsiflorus	Fabaceae	Mohave Lupine	35.0264	-114.384	825		Oatman, Arizona		native	153	145	148	http://eol.org/data_objects/12518929		0.9375	0.0522876	0.6	337.5	5	60	33.75	316			http://eol.org/schema/terms/reddish-purple
Penstemon palmeri	Plantaginaceae	Scented Beardtongue	39.1436	-114.337	2184		Sacramento Pass, White Pine, Nevada		native	192	165	189	http://eol.org/data_objects/19093793		0.851852	0.140625	0.752941	306.667	14	75	25.1852	700			http://eol.org/schema/terms/reddish-purple
Penstemon palmeri	Plantaginaceae	Scented Beardtongue	38.9833	-114.3	3519	x	Great Basin National Park, Nevada		native	137	111	125	http://eol.org/data_objects/13266771		0.910256	0.189781	0.537255	327.692	19	54	31.0256	679			http://eol.org/schema/terms/reddish-purple
Lupinus argenteus	Fabaceae	Silvery Lupine	38.9833	-114.3	3519	x	Great Basin National Park, Nevada		native	164	157	208	http://eol.org/data_objects/13264589		0.689542	0.245192	0.815686	248.235	25	82	8.95425	677			http://eol.org/schema/terms/purplish-blue
Lupinus argenteus	Fabaceae	Silvery Lupine	38.9833	-114.3	3519	x	Great Basin National Park, White Pine, Nevada		native	91	98	189	http://eol.org/data_objects/19093770		0.654762	0.518519	0.741176	235.714	52	74	5.47619	678			http://eol.org/schema/terms/greenish-blue
Phacelia cryptantha	Plantaginaceae	Hidden-flower Scorpionweed	35.1894	-114.053	1073		Kingman, Arizona		native	129	112	130	http://eol.org/data_objects/12522435		0.824074	0.138462	0.509804	296.667	14	51	22.4074	320			http://eol.org/schema/terms/purplish-blue
Anemone drummondii var. lithophila	Ranunculaceae	Drummond's Anemone	48.7596	-113.787	1472		Glacier National Park, Montana, US		native	221	183	206	http://eol.org/data_objects/13256174		0.899123	0.171946	0.866667	323.684	17	87	29.9123	952			http://eol.org/schema/terms/reddish-purple
Campanula rotundifolia	Campanulaceae	Harebell	48.7596	-113.787	1472		Glacier N.P. - lower loop trail, Flathead County, Montana		native	139	135	236	http://eol.org/data_objects/23794827	too vague	0.673267	0.427966	0.92549	242.376	43	93	7.32673	953			http://eol.org/schema/terms/purplish-blue
Campanula rotundifolia	Campanulaceae	Harebell	48.7596	-113.787	1472		Glacier National Park, Montana, US		native	107	113	146	http://eol.org/data_objects/13257950		0.641026	0.267123	0.572549	230.769	27	57	4.10256	954			http://eol.org/schema/terms/greenish-blue
Mertensia oblongifolia	Boraginaceae	Spindleroot Bluebells	42.0775	-113.704	1816		Cassia City of Rocks, CassiaCassia, Nevada		native	150	158	226	http://eol.org/data_objects/13265279		0.649123	0.336283	0.886275	233.684	34	89	4.91228	845	Y		http://eol.org/schema/terms/greenish-blue
Mertensia oblongifolia	Boraginaceae	Spindleroot Bluebells	42.0775	-113.704	1816		Cassia City of Rocks, CassiaCassia, Nevada		native	142	142	206	http://eol.org/data_objects/13265281		0.666667	0.31068	0.807843	240	31	81	6.66667	846	Y		http://purl.obolibrary.org/obo/PATO_0000318
Mertensia oblongifolia	Boraginaceae	Spindleroot Bluebells	42.0775	-113.704	1816		City of Rocks National Preserve, Idaho		native	125	111	197	http://eol.org/data_objects/11506274		0.693798	0.436548	0.772549	249.767	44	77	9.37984	847	Y		http://eol.org/schema/terms/purplish-blue
Penstemon palmeri	Plantaginaceae	Scented Beardtongue	37.2	-112.986	1382		Zion National Park, Utah		native	178	123	131	http://eol.org/data_objects/12522258		0.975758	0.308989	0.698039	351.273	31	70	37.5758	458			http://eol.org/schema/terms/reddish-purple
Collinsia parviflora	Plantaginaceae	Blue-eyed Mary	37.2197	-112.929	1668		Zion National Park, Checkerboard Mesa area, Utah		native	196	160	199	http://eol.org/data_objects/12511617		0.820513	0.19598	0.780392	295.385	20	78	22.0513	459	Y		http://eol.org/schema/terms/purplish-blue
Lupinus sparsiflorus	Fabaceae	Mohave Lupine	32.0878	-112.906	566		Organ Pipe Cactus National Monument, Arizona,		native	92	75	93	http://eol.org/data_objects/12518928		0.824074	0.193548	0.364706	296.667	19	36	22.4074	210			http://eol.org/schema/terms/purplish-blue
Phlox hoodii subsp. canescens	Polemoniaceae	Hood's Phlox	40.5294	-112.298	1575.82		Tooele Co., Utah		native	180	178	181	http://eol.org/data_objects/24952745	coordinates approximate	0.777778	0.0165746	0.709804	280	2	71	17.7778	785			http://eol.org/schema/terms/purplish-blue
Lupinus sparsiflorus	Fabaceae	Mohave Lupine	33.3631	-111.986	423		Pima Canyon, South Mountain, Phoenix, Arizona		native	119	128	180	http://eol.org/data_objects/5900985		0.642077	0.338889	0.705882	231.148	34	71	4.20765	243			http://eol.org/schema/terms/greenish-blue
Lupinus sparsiflorus	Fabaceae	Mohave Lupine	33.3631	-111.986	423		Pima Canyon, South Mountain, Phoenix, Arizona		native	114	119	177	http://eol.org/data_objects/5900986		0.653439	0.355932	0.694118	235.238	36	69	5.34392	244			http://eol.org/schema/terms/greenish-blue
Lupinus argenteus var. heteranthus	Fabaceae	Silvery Lupine	41.1999	-111.882	2897	x	Mount Ogden, Ogden, Utah		native	141	128	212	http://eol.org/data_objects/24170557	original coordinates appeared to be in error	0.69246	0.396226	0.831373	249.286	40	83	9.24603	818			http://eol.org/schema/terms/purplish-blue
Campanula rotundifolia	Campanulaceae	Harebell	35.3586	-111.621	2608		Locket Meadows San Francisco Mts		native	157	117	239	http://eol.org/data_objects/13523862		0.721311	0.51046	0.937255	259.672	51	94	12.1311	326			http://eol.org/schema/terms/purplish-blue
Lupinus sparsiflorus	Fabaceae	Mohave Lupine	32.6461	-111.401	576		Picacho Peak State Park, Arizona		native	99	84	144	http://eol.org/data_objects/12518930		0.708333	0.416667	0.564706	255	42	56	10.8333	218			http://eol.org/schema/terms/purplish-blue
Lupinus sparsiflorus	Fabaceae	Mohave Lupine	32.2565	-111.16	850		King Canyon Trail, Saguaro National Park, Arizona		native	124	109	187	http://eol.org/data_objects/24896742		0.698718	0.417112	0.733333	251.538	42	73	9.87179	213			http://eol.org/schema/terms/purplish-blue
Lupinus sparsiflorus	Fabaceae	Mohave Lupine	32.2565	-111.16	850		King Canyon Trail, Saguaro National Park, Arizona		native	90	77	134	http://eol.org/data_objects/24896743		0.704678	0.425373	0.52549	253.684	43	53	10.4678	214			http://eol.org/schema/terms/purplish-blue
Lupinus sparsiflorus	Fabaceae	Mohave Lupine	32.2238	-111.144	809		Tucson Mountain Park, Arizona		native	164	156	237	http://eol.org/data_objects/24973072		0.683128	0.341772	0.929412	245.926	34	93	8.31276	211			http://eol.org/schema/terms/purplish-blue
Lupinus sparsiflorus	Fabaceae	Mohave Lupine	32.2238	-111.144	809		Tucson Mountain Park, Arizona		native	129	119	205	http://eol.org/data_objects/24973073		0.686047	0.419512	0.803922	246.977	42	80	8.60465	212			http://eol.org/schema/terms/purplish-blue
Veronica persica	Plantaginaceae	Birdeye Speedwell	32.3756	-110.969	805		James D Kriegh Park, Oro Valley, Arizona		native	77	99	133	http://eol.org/data_objects/24968192		0.60119	0.421053	0.521569	216.429	42	52	0.119048	216			http://eol.org/schema/terms/greenish-blue
Lactuca tatarica	Asteraceae	Chicory Lettuce	31.7219	-110.885	1700		Upper Madera Canyon, Santa Rita Mountains, Arizona		native	152	127	191	http://eol.org/data_objects/24965178	coordinates approximate	0.731771	0.335079	0.74902	263.437	34	75	13.1771	208			http://eol.org/schema/terms/purplish-blue
Lactuca tatarica	Asteraceae	Chicory Lettuce	31.7219	-110.885	1700		Upper Madera Canyon, Santa Rita Mountains, Arizona		native	117	84	147	http://eol.org/data_objects/24965179		0.753968	0.428571	0.576471	271.429	43	58	15.3968	209			http://eol.org/schema/terms/purplish-blue
Commelina erecta	Commelinaceae	Whitemouth Dayflower	31.5395	-110.756	1237		near Patagonia, Arizona		native	152	170	225	http://eol.org/data_objects/13488232		0.625571	0.324444	0.882353	225.205	32	88	2.55708	206			http://eol.org/schema/terms/greenish-blue
Iris missouriensis	Iridaceae	Rocky Mountain Iris	44.428	-110.588	2454	x	Yellowstone National Park, Wyoming		native	190	178	199	http://eol.org/data_objects/12517263		0.761905	0.105528	0.780392	274.286	11	78	16.1905	938			http://eol.org/schema/terms/purplish-blue
Lupinus brevicaulis	Fabaceae	Shortstem Lupine	38.7331	-109.593	1384		Utah, Arches National Monument		native	84	67	154	http://eol.org/data_objects/23392759		0.699234	0.564935	0.603922	251.724	56	60	9.92337	659			http://eol.org/schema/terms/purplish-blue
Lupinus brevicaulis	Fabaceae	Shortstem Lupine	38.7331	-109.593	1384		Utah, Arches National Monument		native	115	91	178	http://eol.org/data_objects/23392757		0.712644	0.488764	0.698039	256.552	49	70	11.2644	657			http://eol.org/schema/terms/purplish-blue
Lupinus brevicaulis	Fabaceae	Shortstem Lupine	38.7331	-109.593	1384		Utah, Arches National Monument		native	119	95	180	http://eol.org/data_objects/23392758		0.713725	0.472222	0.705882	256.941	47	71	11.3725	658			http://eol.org/schema/terms/purplish-blue
Collinsia sparsiflora	Plantaginaceae	Spinster's Blue Eyed Mary	43.038	-107.093	1795		Hell's Half Acre		native	183	163	240	eol.org/data_objects/24169370		0.709957	0.320833	0.941176	255.584	32	94	10.9957	917	Y		http://eol.org/schema/terms/purplish-blue
Campanula rotundifolia	Campanulaceae	Harebell	40.0459	-107.07	2956.56	x	Bear Lake Campground, Routt County, Colorado		native	103	95	167	http://eol.org/data_objects/13257951		0.685185	0.431138	0.654902	246.667	43	65	8.51852	132			http://eol.org/schema/terms/purplish-blue
Sisyrinchium montanum	Iridaceae	Strict Blue-eyed-grass	36.0384	-106.851	2873		New Mexico, Jemez Mtns., San Pedro Parks		native	174	155	205	http://eol.org/data_objects/23357498		0.73	0.243902	0.803922	262.8	24	80	13	361	Y		http://eol.org/schema/terms/purplish-blue
Campanula rotundifolia	Campanulaceae	Harebell	36.1208	-106.81	3225	x	Nacimiento Mountains, near Resumidero Spring, Rio Arriba County, New Mexico		native	152	119	203	http://eol.org/data_objects/13149402		0.732143	0.413793	0.796078	263.571	41	80	13.2143	385			http://eol.org/schema/terms/purplish-blue
Sisyrinchium montanum	Iridaceae	Strict Blue-eyed-grass	52.1344	-106.648	501		Saskatoon, Saskatchewan, Canada		native	157	134	220	http://eol.org/data_objects/10060872		0.71124	0.390909	0.862745	256.047	39	86	11.124	963	Y		http://eol.org/schema/terms/purplish-blue
Iris missouriensis	Iridaceae	Rocky Mountain Iris	38.9694	-106.493	3663	x	Collegiate Range, near Buena Vista, Colorado		native	131	131	188	http://eol.org/data_objects/13263286	coordinates for Collegiate Peaks Wildnerness	0.666667	0.303191	0.737255	240	30	74	6.66667	674			http://purl.obolibrary.org/obo/PATO_0000318
Polemonium pulcherrimum	Polemoniaceae	Showy Jacob's-ladder	38.9694	-106.493	3663	x	Collegiate Range, near Buena Vista, Colorado		native	145	145	183	http://eol.org/data_objects/13267603		0.666667	0.20765	0.717647	240	21	72	6.66667	675			http://purl.obolibrary.org/obo/PATO_0000318
Linum lewisii	Linaceae	Prairie Flax	35.1659	-106.473	1952		Elena Gallegos Picnic Area, Albuquerque, NM		native	168	173	233	http://eol.org/data_objects/12490948		0.653846	0.27897	0.913725	235.385	28	91	5.38462	319			http://eol.org/schema/terms/greenish-blue
Penstemon strictus	Plantaginaceae	Rocky Mountain Beardtongue	35.1981	-106.434	3116	x	New Mexico, Bernalillo County, Sandia Crest		native	88	42	95	http://eol.org/data_objects/23388453		0.811321	0.557895	0.372549	292.075	56	37	21.1321	321			http://eol.org/schema/terms/purplish-blue
Penstemon strictus	Plantaginaceae	Rocky Mountain Beardtongue	35.1981	-106.434	3116	x	New Mexico, Bernalillo County, Sandia Crest		native	144	110	134	http://eol.org/data_objects/23388454		0.882353	0.236111	0.564706	317.647	24	56	28.2353	322			http://eol.org/schema/terms/reddish-purple
Penstemon strictus	Plantaginaceae	Rocky Mountain Beardtongue	35.1981	-106.434	3116	x	Sandia Mountains, near Capulin Spring, Sandoval County, New Mexico		native	132	69	196	http://eol.org/data_objects/13163040		0.749344	0.647959	0.768627	269.764	65	77	14.9344	323			http://eol.org/schema/terms/purplish-blue
Phacelia campanularia	Plantaginaceae	Desert Scorpionweed	38.8278	-106.409	3686	x	Cottonwood Pass		native	55	49	94	http://eol.org/data_objects/12522417		0.688889	0.478723	0.368627	248	48	37	8.88889	664			http://eol.org/schema/terms/purplish-blue
Lupinus argenteus	Fabaceae	Silvery Lupine	35.8111	-106.234	1902		on the road from Córdova, New Mexico, to Borrego Mesa.		native	136	125	180	http://eol.org/data_objects/5917170		0.7	0.305556	0.705882	252	31	71	10	343			http://eol.org/schema/terms/purplish-blue
Lupinus argenteus	Fabaceae	Silvery Lupine	35.8111	-106.234	1902		on the road from Córdova, New Mexico, to Borrego Mesa.		native	134	106	186	http://eol.org/data_objects/5917171	approximate	0.725	0.430108	0.729412	261	43	73	12.5	342			http://eol.org/schema/terms/purplish-blue
Penstemon strictus	Plantaginaceae	Rocky Mountain Beardtongue	36.5127	-106.108	2468		Confluence of Rio Vallecitos and Rock Creek, Rio Arriba County, New Mexico		native	100	43	164	http://eol.org/data_objects/13163041	approximate	0.745179	0.737805	0.643137	268.264	74	64	14.5179	424			http://eol.org/schema/terms/purplish-blue
Penstemon palmeri	Plantaginaceae	Scented Beardtongue	35.6052	-106.017	1984		3 mile SW of Santa Fe, Santa Fe County, New Mexico		native	132	92	141	http://eol.org/data_objects/13162974		0.802721	0.347518	0.552941	288.98	35	55	20.2721	332			http://eol.org/schema/terms/purplish-blue
Symphyotrichum ericoides	Asteraceae	White Heath Aster	33.1576	-105.774	2018		Mescalero, Otero County, New Mexico		native	168	166	176	http://eol.org/data_objects/23795699		0.7	0.0568182	0.690196	252	6	69	10	235			http://eol.org/schema/terms/purplish-blue
Lactuca tatarica	Asteraceae	Chicory Lettuce	32.9533	-105.741	2692		S side of Cloudcroft on Panther Ave. near 4th, Otero County, New Mexico		native	111	109	148	http://eol.org/data_objects/23795299	Mulgedium oblongifolium	0.675214	0.263514	0.580392	243.077	26	58	7.52137	222			http://eol.org/schema/terms/purplish-blue
Lactuca tatarica	Asteraceae	Chicory Lettuce	32.9533	-105.741	2692		S side of Cloudcroft on Panther Ave. near 4th, Otero County, New Mexico		native	127	123	161	http://eol.org/data_objects/23795300		0.684211	0.236025	0.631373	246.316	24	63	8.42105	223			http://eol.org/schema/terms/purplish-blue
Campanula rotundifolia	Campanulaceae	Harebell	40.3428	-105.684	2905	x	Rocky Mountain National Park, Colorado		native	210	196	237	http://eol.org/data_objects/13257948		0.723577	0.172996	0.929412	260.488	17	93	12.3577	769			http://eol.org/schema/terms/purplish-blue
Polemonium pulcherrimum	Polemoniaceae	Showy Jacob's-ladder	40.3428	-105.684	2905	x	Rocky Mountain National Park, Colorado		native	214	211	250	http://eol.org/data_objects/12523799		0.679487	0.156	0.980392	244.615	16	98	7.94872	770			http://eol.org/schema/terms/purplish-blue
Symphyotrichum laeve	Asteraceae	Smooth Blue Aster	37.5775	-105.486	4373	x	Sangre de Cristo Mountains, Holy Ghost Canyon, San Miguel County, New Mexico		native	179	124	216	http://eol.org/data_objects/13168793		0.766304	0.425926	0.847059	275.87	43	85	16.6304	480	Y		http://eol.org/schema/terms/purplish-blue
Campanula rotundifolia	Campanulaceae	Harebell	41.1608	-105.369	2492	x	Vedauwoo Rocks, Albany, Wyoming,		native	159	150	199	http://eol.org/data_objects/23484197		0.697279	0.246231	0.780392	251.02	25	78	9.72789	816			http://eol.org/schema/terms/purplish-blue
Sisyrinchium montanum	Iridaceae	Strict Blue-eyed-grass	38.9906	-104.861	2043		USA, Colorado, USAF Academy		native	132	120	167	http://eol.org/data_objects/22942966		0.70922	0.281437	0.654902	255.319	28	65	10.922	680	Y		http://eol.org/schema/terms/purplish-blue
Sisyrinchium angustifolium	Iridaceae	Strict Blue-eyed Grass	29.8688	-101.162	488		Texas, Val Verde County, Del Rio		native	110	86	131	http://eol.org/data_objects/23388839		0.755556	0.343511	0.513725	272	34	51	15.5556	200	Y		http://eol.org/schema/terms/purplish-blue
Teucrium cubense	Lamiaceae	Small Coast Germander	20.58	-100.388	1827		El Refugio, Jalpan, Querétaro		native	207	212	210	http://eol.org/data_objects/25154577		0.433333	0.0235849	0.831373	156	2	83	-16.6667	178			http://eol.org/schema/terms/greenish-blue
Sisyrinchium montanum	Iridaceae	Strict Blue-eyed-grass	32.371	-99.1926	490		Texas, Pitnam		native	185	161	246	http://eol.org/data_objects/22729864		0.713725	0.345528	0.964706	256.941	35	96	11.3725	215	Y		http://eol.org/schema/terms/purplish-blue
Sisyrinchium montanum	Iridaceae	Strict Blue-eyed-grass	33.2184	-98.1587	331		Texas, Jacksboro		native	175	164	189	http://eol.org/data_objects/22731367		0.74	0.132275	0.741176	266.4	13	74	14	236	Y		http://eol.org/schema/terms/purplish-blue
Sisyrinchium montanum	Iridaceae	Strict Blue-eyed-grass	33.2184	-98.1587	331		Texas, Jacksboro		native	173	160	184	http://eol.org/data_objects/22731368		0.756944	0.130435	0.721569	272.5	13	72	15.6944	237	Y		http://eol.org/schema/terms/purplish-blue
Androstephium coeruleum	Asparagaceae	Blue Funnel Lily	30.0595	-97.9534	277		Onion Creek WQPL, near Austin		native	147	154	228	http://eol.org/data_objects/23422356		0.652263	0.355263	0.894118	234.815	36	89	5.22634	201	Y		http://eol.org/schema/terms/greenish-blue
Commelina erecta	Commelinaceae	Whitemouth Dayflower	30.3491	-97.8056	181		Bunny Run, Austin, Texas		native	68	123	251	http://eol.org/data_objects/24763315		0.616576	0.729084	0.984314	221.967	73	98	1.65756	7			http://eol.org/schema/terms/greenish-blue
Veronica persica	Plantaginaceae	Birdeye Speedwell	30.4666	-97.7908	278		Lake Creek, Jollyville, Texas		native	181	182	216	http://eol.org/data_objects/24234924		0.661905	0.162037	0.847059	238.286	16	85	6.19048	205			http://eol.org/schema/terms/greenish-blue
Viola sororia var. missouriensis	Violaceae	Sand Violet	30.1105	-97.3153	116		Texas, Bastrop		native	133	89	147	http://eol.org/data_objects/23388037		0.793103	0.394558	0.576471	285.517	39	58	19.3103	202			http://eol.org/schema/terms/purplish-blue
Veronica persica	Plantaginaceae	Birdeye Speedwell	32.8747	-97.2772	192		Arcadia Trail Park, Fort Worth, TX		native	174	182	239	http://eol.org/data_objects/24049722		0.646154	0.271967	0.937255	232.615	27	94	4.61538	221			http://eol.org/schema/terms/greenish-blue
Teucrium cubense	Lamiaceae	Small Coast Germander	28.714	-97.1757	35		Coleto Creek Park and Reservoir		native	237	250	248	http://eol.org/data_objects/25352255		0.474359	0.052	0.980392	170.769	5	98	-12.5641	196			http://eol.org/schema/terms/greenish-blue
Viola sororia	Violaceae	Hooded Blue Violet	35.7479	-95.3697	182		Oklahoma, Muskogee		native	226	214	167	http://eol.org/data_objects/22731489		0.132768	0.261062	0.886275	47.7966	26	89	-46.7232	338	Y		http://purl.obolibrary.org/obo/PATO_0001944
Viola dactyloides	Violaceae	Trilobed Violet	31.6035	-94.6555	83		Texas, Nacogdoches		native	114	42	130	http://eol.org/data_objects/23388065		0.80303	0.676923	0.509804	289.091	68	51	20.303	207			http://eol.org/schema/terms/purplish-blue
Lobelia siphilitica	Campanulaceae	Great Blue Lobelia	39.0533	-94.2778	266		Burr Oak Woods, MO		native	176	194	251	http://eol.org/data_objects/22860667		0.626667	0.298805	0.984314	225.6	30	98	2.66667	106	Y		http://eol.org/schema/terms/greenish-blue
Camassia angusta	Asparagaceae	Prairie Camas	37.4705	-94.2542	304		1 mi SE of Lamar, just W of Pleasant Hill School, where railroad tracks cross E-W dirt road, Barton County MO		native	116	111	105	http://eol.org/data_objects/17538907		0.0909091	0.0948276	0.454902	32.7273	9	45	-50.9091	474			http://purl.obolibrary.org/obo/PATO_0001944
Houstonia pusilla	Lamiaceae	Tiny Bluet	33.3801	-94.0431	83		Texas, Texarkana, state line		native	227	187	211	http://eol.org/data_objects/22731445		0.9	0.176211	0.890196	324	18	89	30	245	Y		http://eol.org/schema/terms/reddish-purple
Campanula rotundifolia	Campanulaceae	Harebell	42.2855	-92.0017	272		Iowa, 2 mi S of Brandon		native	113	106	137	http://eol.org/data_objects/22728416		0.704301	0.226277	0.537255	253.548	23	54	10.4301	879			http://eol.org/schema/terms/purplish-blue
Hedeoma pulegioides	Lamiaceae	American False Pennyroyal	39.4781	-91.8228	187		North shoreline of Mark Twain Lake, 3.5 airline km SW of Florida		native	214	200	215	http://eol.org/data_objects/17496659		0.822222	0.0697674	0.843137	296	7	84	22.2222	117			http://eol.org/schema/terms/purplish-blue
Hedeoma pulegioides	Lamiaceae	American False Pennyroyal	39.4781	-91.8228	187		North shoreline of Mark Twain Lake, 3.5 airline km SW of Florida		native	228	195	230	http://eol.org/data_objects/17496663		0.82381	0.152174	0.901961	296.571	15	90	22.381	119			http://eol.org/schema/terms/purplish-blue
Hedeoma pulegioides	Lamiaceae	American False Pennyroyal	39.4781	-91.8228	187		North shoreline of Mark Twain Lake, 3.5 airline km SW of Florida		native	220	184	217	http://eol.org/data_objects/17496662		0.847222	0.163636	0.862745	305	16	86	24.7222	118			http://eol.org/schema/terms/reddish-purple
Agastache foeniculum	Lamiaceae	Blue Giant Hyssop	44.0495	-91.5238	203		Trempealeau National Wildlife Refuge, West Prairie, Wisconsin, United States		native	173	153	207	http://eol.org/data_objects/13521907		0.728395	0.26087	0.811765	262.222	26	81	12.8395	936	Y		http://eol.org/schema/terms/purplish-blue
Houstonia pusilla	Lamiaceae	Tiny Bluet	38.7736	-91.3733	201		Daniel Boone Conservation Area, along trail #1213		native	195	195	242	http://eol.org/data_objects/22202121		0.666667	0.194215	0.94902	240	19	95	6.66667	102	Y		http://purl.obolibrary.org/obo/PATO_0000318
Houstonia pusilla	Lamiaceae	Tiny Bluet	38.7736	-91.3733	201		Daniel Boone Conservation Area, along trail #1213		native	219	216	251	http://eol.org/data_objects/22202120		0.680952	0.139442	0.984314	245.143	14	98	8.09524	103	Y		http://eol.org/schema/terms/purplish-blue
Conoclinium coelestinum	Asteraceae	Blue Mistflower	36.7722	-91.2758	152.4		Mark Twain National Forest; Turner's Mill Access along NE bank of Eleven Point River at S end of Forest Road #3190, ca. 8 mi NE of Alton		native	232	220	222	http://eol.org/data_objects/1381506		0.972222	0.0517241	0.909804	350	5	91	37.2222	43	Y		http://eol.org/schema/terms/reddish-purple
Campanula americana	Campanulaceae	American Bellflower	38.0583	-91.2289	194		0.3 airline miles W of the intersection of the Meramec River and MO State Hwy. H.		native	194	154	240	http://eol.org/data_objects/22031019		0.744186	0.358333	0.941176	267.907	36	94	14.4186	598			http://eol.org/schema/terms/purplish-blue
Veronica persica	Plantaginaceae	Birdeye Speedwell	38.6508	-91.2264	152		Along Katy Trail, ca. 0.7 air mi WNW, bearing 303 degrees of Pickney Bottom Rd.		native	126	147	202	http://eol.org/data_objects/22214768		0.620614	0.376238	0.792157	223.421	38	79	2.0614	98			http://eol.org/schema/terms/greenish-blue
Ageratum houstonianum	Asteraceae	Floss Flower	15.4353	-91.0356	1810		Guatemala, San Juan Cotzal, Quiché	No	native	186	178	210	http://eol.org/data_objects/1991709		0.708333	0.152381	0.823529	255	15	82	10.8333	177			http://eol.org/schema/terms/purplish-blue
Sisyrinchium angustifolium	Iridaceae	Strict Blue-eyed Grass	38.6833	-90.7342	198.12		Weldon Spring, along Hamburg Trail 0.1 air mi N of east entrance to Lost Valley disturbed area along gravel haul road		native	154	151	212	http://eol.org/data_objects/22096449		0.674863	0.287736	0.831373	242.951	29	83	7.48634	99	Y		http://eol.org/schema/terms/purplish-blue
Lobelia siphilitica	Campanulaceae	Great Blue Lobelia	41.4915	-90.6356	169		Nahant Marsh		native	128	126	206	http://eol.org/data_objects/1387272		0.670833	0.38835	0.807843	241.5	39	81	7.08333	825	Y		http://eol.org/schema/terms/purplish-blue
Conoclinium coelestinum	Asteraceae	Blue Mistflower	37.9747	-90.5322	199.644		St. Francois State Park, Coonville Creek bottomland		native	139	140	197	http://eol.org/data_objects/22000299		0.663793	0.294416	0.772549	238.966	29	77	6.37931	88	Y		http://eol.org/schema/terms/greenish-blue
Conoclinium coelestinum	Asteraceae	Blue Mistflower	37.9747	-90.5322	199.644		St. Francois State Park, Coonville Creek bottomland		native	148	138	227	http://eol.org/data_objects/22000300		0.685393	0.39207	0.890196	246.742	39	89	8.53933	87	Y		http://eol.org/schema/terms/purplish-blue
Ionactis linariifolia	Asteracea	Savoryleaf Aster	37.9725	-90.5322	195.682		St. Francois State Park, Mooner's Hollow Trail halfway up a steep hillside above Coonville Creek, MO		native	204	216	251	http://eol.org/data_objects/22006981		0.624113	0.187251	0.984314	224.681	19	98	2.41135	83			http://eol.org/schema/terms/greenish-blue
Ionactis linariifolia	Asteracea	Savoryleaf Aster	37.9725	-90.5322	195.682		St. Francois State Park, Mooner's Hollow Trail halfway up a steep hillside above Coonville Creek, MO		native	161	166	241	http://eol.org/data_objects/22006986		0.65625	0.33195	0.945098	236.25	33	95	5.625	84			http://eol.org/schema/terms/greenish-blue
Ionactis linariifolia	Asteracea	Savoryleaf Aster	37.9725	-90.5322	195.682		St. Francois State Park, Mooner's Hollow Trail halfway up a steep hillside above Coonville Creek, MO		native	192	184	219	http://eol.org/data_objects/22006987		0.704762	0.159817	0.858824	253.714	16	86	10.4762	85			http://eol.org/schema/terms/purplish-blue
Ionactis linariifolia	Asteracea	Savoryleaf Aster	37.9725	-90.5322	195.682		St. Francois State Park, Mooner's Hollow Trail halfway up a steep hillside above Coonville Creek, MO		native	180	162	172	http://eol.org/data_objects/22006988		0.907407	0.1	0.705882	326.667	10	71	30.7407	86			http://eol.org/schema/terms/reddish-purple
Symphyotrichum oolentangiense	Asteraceae	Skyblue Aster	37.9694	-90.5275	221		St. Francois state park, glade region 0.3 air mi ESE, bearing 101 degrees from Mooner's Hollow parking lot glade		native	165	137	207	http://eol.org/data_objects/22318662		0.733333	0.338164	0.811765	264	34	81	13.3333	82	Y		http://eol.org/schema/terms/purplish-blue
Symphyotrichum oolentangiense	Asteraceae	Skyblue Aster	37.9694	-90.5275	221		St. Francois state park, glade region 0.3 air mi ESE, bearing 101 degrees from Mooner's Hollow parking lot glade		native	181	153	216	http://eol.org/data_objects/22318661		0.740741	0.291667	0.847059	266.667	29	85	14.0741	81	Y		http://eol.org/schema/terms/purplish-blue
Conoclinium coelestinum	Asteraceae	Blue Mistflower	30.4393	-90.4599	9		S edge of Pontchatoula on old Hwy. 51, Tangipahoa Parish, Louisiana		native	169	164	212	http://eol.org/data_objects/22551853	coordinates approximate	0.684028	0.226415	0.831373	246.25	23	83	8.40278	204	Y		http://eol.org/schema/terms/purplish-blue
Sisyrinchium albidum	Iridaceae	White Blue-eyed-grass	42.056	-90.3589	234		United States, IA, Jackson Co., McNeil Preserve		native	252	252	251	http://eol.org/data_objects/1394761		0.166667	0.00396825	0.988235	60	0	99	-43.3333	844	Y		http://purl.obolibrary.org/obo/PATO_0000324
Houstonia pusilla	Lamiaceae	Tiny Bluet	38.6072	-90.2642	161		Tower Grove Park, between Center Cross and Kingshighway		native	213	202	218	http://eol.org/data_objects/17523228		0.78125	0.0733945	0.854902	281.25	7	85	18.125	95	Y		http://eol.org/schema/terms/purplish-blue
Houstonia pusilla	Lamiaceae	Tiny Bluet	38.6072	-90.2642	161		Tower Grove Park, between Center Cross and Kingshighway		native	227	196	237	http://eol.org/data_objects/17523229		0.792683	0.172996	0.929412	285.366	17	93	19.2683	94	Y		http://eol.org/schema/terms/purplish-blue
Viola labradorica	Violaceae	American Dog Violet	42.1448	-90.158	204		IL, Carroll Co., Savanna, Palisades State Park		native	124	125	171	http://eol.org/data_objects/1397226		0.663121	0.274854	0.670588	238.723	27	67	6.31206	850			http://eol.org/schema/terms/greenish-blue
Campanula americana	Campanulaceae	American Bellflower	43.0207	-90.142	369		Governor Dodge State Park, Wisconsin		native	157	143	181	http://eol.org/data_objects/15648361		0.72807	0.209945	0.709804	262.105	21	71	12.807	915			http://eol.org/schema/terms/purplish-blue
Blephilia hirsuta	Lamiaceae	Hairy Pagoda-plant	38.0331	-90.1297	123		Magnolia Hollow Conservation Area, along main road, 0.7 airline miles W of the western bank of the Mississippi River		native	218	213	222	http://eol.org/data_objects/17496878		0.759259	0.0405405	0.870588	273.333	4	87	15.9259	590			http://eol.org/schema/terms/purplish-blue
Blephilia hirsuta	Lamiaceae	Hairy Pagoda-plant	38.0331	-90.1297	123		Magnolia Hollow Conservation Area, along main road, 0.7 airline miles W of the western bank of the Mississippi River		native	246	216	243	http://eol.org/data_objects/17496885		0.85	0.121951	0.964706	306	12	96	25	591			http://eol.org/schema/terms/reddish-purple
Blephilia hirsuta	Lamiaceae	Hairy Pagoda-plant	38.0331	-90.1297	123		Magnolia Hollow Conservation Area, along main road, 0.7 airline miles W of the western bank of the Mississippi River		native	230	187	225	http://eol.org/data_objects/22100341		0.852713	0.186957	0.901961	306.977	19	90	25.2713	593			http://eol.org/schema/terms/reddish-purple
Blephilia hirsuta	Lamiaceae	Hairy Pagoda-plant	38.0331	-90.1297	123		Magnolia Hollow Conservation Area, along main road, 0.7 airline miles W of the western bank of the Mississippi River		native	179	145	175	http://eol.org/data_objects/17496886		0.852941	0.189944	0.701961	307.059	19	70	25.2941	592			http://eol.org/schema/terms/reddish-purple
Campanula americana	Campanulaceae	American Bellflower	35.3419	-90.0489	83		Dogwood Ridge, Millington, TN		native	104	137	213	http://eol.org/data_objects/21950172		0.616208	0.511737	0.835294	221.835	51	84	1.6208	325			http://eol.org/schema/terms/greenish-blue
Polemonium reptans	Polemoniaceae	Greek Valerian	37.8085	-89.8905	123		Ball Mill Resurgence Natural Area		native	205	188	212	http://eol.org/data_objects/22286685		0.784722	0.113208	0.831373	282.5	11	83	18.4722	60			http://eol.org/schema/terms/purplish-blue
Conoclinium coelestinum	Asteraceae	Blue Mistflower	39.9222	-89.8162	180		Rock Creek, Tallula, Illinois		native	185	144	233	http://eol.org/data_objects/22464023		0.743446	0.381974	0.913725	267.64	38	91	14.3446	129	Y		http://eol.org/schema/terms/purplish-blue
Lobelia siphilitica	Campanulaceae	Great Blue Lobelia	43.1055	-89.8072	248		Pleasant Valley Conservancy, Vermont, Wisconsin		native	186	183	235	http://eol.org/data_objects/24992565		0.676282	0.221277	0.921569	243.462	22	92	7.62821	920	Y		http://eol.org/schema/terms/purplish-blue
Symphyotrichum laeve	Asteraceae	Smooth Blue Aster	43.1055	-89.8072	248		Pleasant Valley Conservancy, Wisconsin		native	134	123	184	http://eol.org/data_objects/24930091		0.696721	0.331522	0.721569	250.82	33	72	9.67213	921	Y		http://eol.org/schema/terms/purplish-blue
Symphyotrichum oblongifolium	Asteraceae	Aromatic Aster	43.2639	-89.8006	226		Loddes Mill, Wisconsin		native	158	125	199	http://eol.org/data_objects/24992807		0.740991	0.371859	0.780392	266.757	37	78	14.0991	927			http://eol.org/schema/terms/purplish-blue
Symphyotrichum oblongifolium	Asteraceae	Aromatic Aster	43.1767	-89.7948	235		Mazomanie, Wisconsin		native	182	170	217	http://eol.org/data_objects/24981417		0.70922	0.21659	0.85098	255.319	22	85	10.922	925			http://eol.org/schema/terms/purplish-blue
Symphyotrichum oblongifolium	Asteraceae	Aromatic Aster	43.1767	-89.7948	235		Mazomanie, Wisconsin		native	188	161	197	http://eol.org/data_objects/24981418		0.791667	0.182741	0.772549	285	18	77	19.1667	926			http://eol.org/schema/terms/purplish-blue
Verbena hastata	Verbenaceae	Blue Vervain	43.0722	-89.7857	271		Vermont, Wisconsin		native	190	146	222	http://eol.org/data_objects/24993501		0.763158	0.342342	0.870588	274.737	34	87	16.3158	919	Y		http://eol.org/schema/terms/purplish-blue
Polemonium reptans	Polemoniaceae	Greek Valerian	43.0722	-89.7857	271		Vermont, Wisconsin		native	105	126	191	http://eol.org/data_objects/24991083		0.625969	0.450262	0.74902	225.349	45	75	2.5969	918			http://eol.org/schema/terms/greenish-blue
Symphyotrichum oolentangiense	Asteraceae	Skyblue Aster	43.1391	-89.7735	265		Black Earth, Wisconsin		native	174	153	217	http://eol.org/data_objects/24993455		0.721354	0.294931	0.85098	259.688	29	85	12.1354	924	Y		http://eol.org/schema/terms/purplish-blue
Symphyotrichum laeve	Asteraceae	Smooth Blue Aster	43.1391	-89.7735	265		Black Earth Rettenmund Prairie , Wisconsin		native	207	189	241	http://eol.org/data_objects/24992821		0.724359	0.215768	0.945098	260.769	22	95	12.4359	923	Y		http://eol.org/schema/terms/purplish-blue
Polemonium reptans	Polemoniaceae	Greek Valerian	43.3711	-89.7731	263		Bluffview, Wisconsin		native	172	183	223	http://eol.org/data_objects/24968380		0.630719	0.2287	0.87451	227.059	23	87	3.0719	933			http://eol.org/schema/terms/greenish-blue
Sisyrinchium campestre	Iridaceae	Prairie Blue-eyed-grass	43.0176	-89.7454	322		Mount Horeb, Wisconsin, Stewart County Park		native	200	220	252	http://eol.org/data_objects/24990436		0.602564	0.206349	0.988235	216.923	21	99	0.25641	913	Y		http://eol.org/schema/terms/greenish-blue
Sisyrinchium campestre	Iridaceae	Prairie Blue-eyed-grass	43.0176	-89.7454	322		Mount Horeb, Wisconsin, Stewart County Park		native	188	203	241	http://eol.org/data_objects/24990437		0.619497	0.219917	0.945098	223.019	22	95	1.94969	914	Y		http://eol.org/schema/terms/greenish-blue
Campanula rotundifolia	Campanulaceae	Harebell	43.0086	-89.7385	373		Mount Horeb, Wisconsin		native	132	101	178	http://eol.org/data_objects/16898683		0.733766	0.432584	0.698039	264.156	43	70	13.3766	910			http://eol.org/schema/terms/purplish-blue
Symphyotrichum oolentangiense	Asteraceae	Skyblue Aster	43.0086	-89.7385	373		Mount Horeb, Wisconsin		native	158	155	180	http://eol.org/data_objects/24982260		0.686667	0.138889	0.705882	247.2	14	71	8.66667	912	Y		http://eol.org/schema/terms/purplish-blue
Scutellaria parvula	Lamiaceae	Small Skullcap	43.0086	-89.7385	373		Mount Horeb, Wisconsin		native	153	129	209	http://eol.org/data_objects/24988534		0.716667	0.382775	0.819608	258	38	82	11.6667	911			http://eol.org/schema/terms/purplish-blue
Lupinus obtusilobus	Fabaceae	Blunt-lobe Lupine	43.1144	-89.6557	297		Cross Plains, Wisconsin,		native	126	93	146	http://eol.org/data_objects/24967377		0.77044	0.363014	0.572549	277.358	36	57	17.044	922			http://eol.org/schema/terms/purplish-blue
Campanula americana	Campanulaceae	American Bellflower	37.7231	-89.6233	127		0.64 airline miles NWW of the intersection of Hwy. PCR 437 and the railroad on the western bank of the Mississippi River, Seventy-Six Conservation Area.		native	200	168	219	http://eol.org/data_objects/22031023	"corolla blue"	0.771242	0.232877	0.858824	277.647	23	86	17.1242	506			http://eol.org/schema/terms/purplish-blue
Sisyrinchium campestre	Iridaceae	Prairie Blue-eyed-grass	37.5552	-89.5637	142		2.08 miles directly W of the western bank of the Mississippi River, along MO Hwy		native	176	182	189	http://eol.org/data_objects/17495054		0.589744	0.0687831	0.741176	212.308	7	74	-1.02564	51	Y		http://eol.org/schema/terms/greenish-blue
Sisyrinchium campestre	Iridaceae	Prairie Blue-eyed-grass	37.5552	-89.5637	142		2.08 miles directly W of the western bank of the Mississippi River, along MO Hwy		native	188	160	233	http://eol.org/data_objects/17495056		0.730594	0.313305	0.913725	263.014	31	91	13.0594	52	Y		http://eol.org/schema/terms/purplish-blue
Sisyrinchium albidum	Iridaceae	White Blue-eyed-grass	43.038	-89.4304	267		Curtis Prairie, Madison, Wisconsin		native	243	245	247	http://eol.org/data_objects/24799221		0.583333	0.0161943	0.968627	210	2	97	-1.66667	916	Y		http://eol.org/schema/terms/greenish-blue
Conoclinium coelestinum	Asteraceae	Blue Mistflower	30.4084	-89.3997	6		Kiln-Delisle Rd., 2 km E of Kiln, Hancock County, Mississippi,		native	141	138	202	http://eol.org/data_objects/23794911		0.674479	0.316832	0.792157	242.812	32	79	7.44792	203	Y		http://eol.org/schema/terms/purplish-blue
Campanula americana	Campanulaceae	American Bellflower	37.5428	-88.9839	164.8		Ca.1 mi S of Goreville, IL		native	168	130	191	http://eol.org/data_objects/22031025	"corolla blue"	0.770492	0.319372	0.74902	277.377	32	75	17.0492	479			http://eol.org/schema/terms/purplish-blue
Collinsia verna	Plantaginaceae	Spring Blue Eyed Mary	40.0035	-88.6511	206		mesic deciduous woodlands at Allerton Park in Piatt County, Illinois		native	112	122	178	http://eol.org/data_objects/24110615		0.641414	0.370787	0.698039	230.909	37	70	4.14141	746	Y		http://eol.org/schema/terms/greenish-blue
Scutellaria parvula	Lamiaceae	Small Skullcap	39.5508	-88.5759	190		Coneflower Hill Prairie near Lake Shelbyville in Moultrie County, Illinois		native	173	166	207	http://eol.org/data_objects/24108261		0.695122	0.198068	0.811765	250.244	20	81	9.5122	720			http://eol.org/schema/terms/purplish-blue
Campanula americana	Campanulaceae	American Bellflower	41.5124	-88.3094	176		2939 Route 52, Minooka, Illinois, US		native	197	144	250	http://eol.org/data_objects/22427926		0.75	0.424	0.980392	270	42	98	15	826			http://eol.org/schema/terms/purplish-blue
Conoclinium coelestinum	Asteraceae	Blue Mistflower	40.113	-88.2895	224		along a drainage canal at Kaufman Lake Park in Champaign, Illinois		native	167	149	180	http://eol.org/data_objects/24109579		0.763441	0.172222	0.705882	274.839	17	71	16.3441	759	Y		http://eol.org/schema/terms/purplish-blue
Hedeoma pulegioides	Lamiaceae	American False Pennyroyal	40.1277	-88.2132	216		upland area of Busey Woods in Urbana, Illinois		native	219	236	207	http://eol.org/data_objects/24110811		0.264368	0.122881	0.92549	95.1724	12	93	-33.5632	767			http://purl.obolibrary.org/obo/PATO_0001941
Blephilia hirsuta	Lamiaceae	Hairy Pagoda-plant	40.1277	-88.2132	216		Along a woodland path at Busey Woods in Urbana, Illinois		native	179	179	185	http://eol.org/data_objects/24110520		0.666667	0.0324324	0.72549	240	3	73	6.66667	766			http://purl.obolibrary.org/obo/PATO_0000318
Viola sororia var. missouriensis	Violaceae	Sand Violet	40.1277	-88.2132	216		Busey Woods in Urbana, Illinois		native	142	133	195	http://eol.org/data_objects/24111433		0.69086	0.317949	0.764706	248.71	32	76	9.08602	768			http://eol.org/schema/terms/purplish-blue
Campanula americana	Campanulaceae	American Bellflower	40.1225	-88.2108	217		The edge of a wooded area at Crystal Lake Park in Urbana, Illinois.		native	146	149	229	http://eol.org/data_objects/24110545		0.660643	0.362445	0.898039	237.831	36	90	6.06426	760			http://eol.org/schema/terms/greenish-blue
Polemonium reptans	Polemoniaceae	Greek Valerian	40.1225	-88.2108	217		Crystal Lake Park in Urbana, Illinois.		native	125	129	176	http://eol.org/data_objects/24111051		0.653595	0.289773	0.690196	235.294	29	69	5.35948	761			http://eol.org/schema/terms/greenish-blue
Symphyotrichum cordifolium	Asteraceae	Lowrie's Blue Wood Aster	40.1225	-88.2108	217		Crystal Lake Park in Urbana, Illinois		native	165	172	179	http://eol.org/data_objects/24110502		0.583333	0.0782123	0.701961	210	8	70	-1.66667	763	Y		http://eol.org/schema/terms/greenish-blue
Symphyotrichum cordifolium	Asteraceae	Lowrie's Blue Wood Aster	40.1225	-88.2108	217		Crystal Lake Park in Urbana, Illinois		native	201	190	242	http://eol.org/data_objects/24110504		0.701923	0.214876	0.94902	252.692	21	95	10.1923	762	Y		http://eol.org/schema/terms/purplish-blue
Lobelia siphilitica	Campanulaceae	Great Blue Lobelia	40.1271	-88.2095	221		Anita Purves Nature Center in Urbana, Illinois		native	138	128	201	http://eol.org/data_objects/24109838		0.689498	0.363184	0.788235	248.219	36	79	8.94977	764	Y		http://eol.org/schema/terms/purplish-blue
Symphyotrichum oblongifolium	Asteraceae	Aromatic Aster	40.1106	-88.2073	223		Urbana, Illinois		native	134	112	181	http://eol.org/data_objects/24107045		0.719807	0.381215	0.709804	259.13	38	71	11.9807	755			http://eol.org/schema/terms/purplish-blue
Ellisia nyctelea	Hydrophyllaceae	Aunt Lucy	40.1106	-88.2073	223		Urbana, Illinois		native	181	185	203	http://eol.org/data_objects/24110696		0.636364	0.108374	0.796078	229.091	11	80	3.63636	751			http://eol.org/schema/terms/greenish-blue
Iris virginica	Iridaceae	Blue Flag Iris	40.1106	-88.2073	223		Urbana, Illinois		native	133	121	110	http://eol.org/data_objects/24109762		0.0797101	0.172932	0.521569	28.6957	17	52	-52.029	752	Y		http://eol.org/schema/terms/orangish-red
Iris virginica	Iridaceae	Blue Flag Iris	40.1106	-88.2073	223		Urbana, Illinois		native	121	118	160	http://eol.org/data_objects/24109765		0.678571	0.2625	0.627451	244.286	26	63	7.85714	753	Y		http://eol.org/schema/terms/purplish-blue
Symphyotrichum oolentangiense	Asteraceae	Skyblue Aster	40.1106	-88.2073	223		Urbana, Illinois		native	170	160	211	http://eol.org/data_objects/24107052		0.699346	0.241706	0.827451	251.765	24	83	9.93464	756	Y		http://eol.org/schema/terms/purplish-blue
Viola dactyloides	Violaceae	Trilobed Violet	40.1106	-88.2073	223		Urbana, Illinois		native	123	115	213	http://eol.org/data_objects/24111441		0.680272	0.460094	0.835294	244.898	46	84	8.02721	758			http://eol.org/schema/terms/purplish-blue
Viola dactyloides	Violaceae	Trilobed Violet	40.1106	-88.2073	223		Urbana, Illinois		native	123	108	212	http://eol.org/data_objects/24111440		0.690705	0.490566	0.831373	248.654	49	83	9.07051	757			http://eol.org/schema/terms/purplish-blue
Sisyrinchium albidum	Iridaceae	White Blue-eyed-grass	40.1106	-88.2073	223		Urbana, Illinois		native	171	176	134	http://eol.org/data_objects/24108353		0.186508	0.238636	0.690196	67.1429	24	69	-41.3492	754	Y		http://purl.obolibrary.org/obo/PATO_0001941
Ipomoea purpurea	Convolvulaceae	Common Morning Glory	40.0789	-88.2035	223		Meadowbrook Park in Urbana, Illinois		introduced	52	27	72	http://eol.org/data_objects/24112369		0.759259	0.625	0.282353	273.333	63	28	15.9259	748			http://eol.org/schema/terms/purplish-blue
Salvia azurea var. grandiflora	Lamiaceae	Azure Blue Sage	40.0789	-88.2035	223		Meadowbrook Park, Urbana, Illinois		native	155	165	233	http://eol.org/data_objects/24108255		0.645299	0.334764	0.913725	232.308	33	91	4.52991	749	Y		http://eol.org/schema/terms/greenish-blue
Symphyotrichum laeve	Asteraceae	Smooth Blue Aster	40.0789	-88.2035	223		Meadowbrook Park in Urbana, Illinois		native	193	184	234	http://eol.org/data_objects/24107022		0.696667	0.213675	0.917647	250.8	21	92	9.66667	750	Y		http://eol.org/schema/terms/purplish-blue
Iodanthus pinnatifidus	Brassicaceae	Purplerocket	40.1275	-88.1949	219		Judge Webber Park in Urbana, Illinois		native	158	160	189	http://eol.org/data_objects/24110873		0.655914	0.164021	0.741176	236.129	16	74	5.5914	765		Y	http://eol.org/schema/terms/greenish-blue
Viola dactyloides	Violaceae	Trilobed Violet	39.4756	-88.1472	207		Lakeview Park near Charleston, Illinois		native	166	145	214	http://eol.org/data_objects/24111448		0.717391	0.32243	0.839216	258.261	32	84	11.7391	714			http://eol.org/schema/terms/purplish-blue
Viola dactyloides	Violaceae	Trilobed Violet	39.4756	-88.1472	207		Lakeview Park near Charleston, Illinois		native	143	121	168	http://eol.org/data_objects/24111449		0.744681	0.279762	0.658824	268.085	28	66	14.4681	715			http://eol.org/schema/terms/purplish-blue
Sisyrinchium campestre	Iridaceae	Prairie Blue-eyed-grass	40.4449	-88.0977	240		Prospect Cemetery Prairie in Ford County, Illinois		native	200	212	227	http://eol.org/data_objects/24108368		0.592593	0.118943	0.890196	213.333	12	89	-0.740741	776	Y		http://eol.org/schema/terms/greenish-blue
Sisyrinchium campestre	Iridaceae	Prairie Blue-eyed-grass	40.4449	-88.0977	240		Prospect Cemetery Prairie in Ford County, Illinois		native	200	211	226	http://eol.org/data_objects/24108369		0.596154	0.115044	0.886275	214.615	12	89	-0.384615	777	Y		http://eol.org/schema/terms/greenish-blue
Lobelia spicata	Campanulaceae	Palespike Lobelia	40.5285	-88.0718	235		Loda Cemetery Prairie in Iroquois County, Illinois		native	205	220	223	http://eol.org/data_objects/24107777		0.527778	0.0807175	0.87451	190	8	87	-7.22222	780			http://eol.org/schema/terms/greenish-blue
Symphyotrichum ericoides	Asteraceae	White Heath Aster	40.5285	-88.0718	235		Loda Cemetery Prairie in Iroquois County, Illinois		native	232	250	248	http://eol.org/data_objects/24107014		0.481481	0.072	0.980392	173.333	7	98	-11.8519	781			http://eol.org/schema/terms/greenish-blue
Symphyotrichum praealtum	Asteraceae	Willowleaf Aster	40.5285	-88.0718	235		Loda Cemetery Prairie in Iroquois County, Illinois		native	180	183	216	http://eol.org/data_objects/24107058		0.652778	0.166667	0.847059	235	17	85	5.27778	784			http://eol.org/schema/terms/greenish-blue
Symphyotrichum praealtum	Asteraceae	Willowleaf Aster	40.5285	-88.0718	235		Loda Cemetery Prairie in Iroquois County, Illinois		native	165	167	203	http://eol.org/data_objects/24107059		0.657895	0.187192	0.796078	236.842	19	80	5.78947	783			http://eol.org/schema/terms/greenish-blue
Symphyotrichum praealtum	Asteraceae	Willowleaf Aster	40.5285	-88.0718	235		Loda Cemetery Prairie in Iroquois County, Illinois		native	192	193	237	http://eol.org/data_objects/24107060		0.662963	0.189873	0.929412	238.667	19	93	6.2963	782			http://eol.org/schema/terms/greenish-blue
Polemonium reptans	Polemoniaceae	Greek Valerian	41.6957	-87.9849	210		Waterfall Glen Forest Preserve, IL		native	147	171	211	http://eol.org/data_objects/25353019		0.604167	0.303318	0.827451	217.5	30	83	0.416667	152			http://eol.org/schema/terms/greenish-blue
Conoclinium coelestinum	Asteraceae	Blue Mistflower	30.6645	-87.9326	1		Meaher State Park, Spanish Fort, Alabama		native	154	157	227	http://eol.org/data_objects/24799277		0.659817	0.321586	0.890196	237.534	32	89	5.98174	8	Y		http://eol.org/schema/terms/greenish-blue
Verbena hastata	Verbenaceae	Blue Vervain	41.6975	-87.8421	189		Palos Fen Nature Preserve, IL		native	126	138	214	http://eol.org/data_objects/25398651		0.643939	0.411215	0.839216	231.818	41	84	4.39394	153	Y		http://eol.org/schema/terms/greenish-blue
Iris virginica	Iridaceae	Blue Flag Iris	42.0597	-87.8414	199.644		James Woodworth Prairie Preserve		native	176	170	201	http://eol.org/data_objects/24994930		0.698925	0.154229	0.788235	251.613	15	79	9.89247	1001	Y		http://eol.org/schema/terms/purplish-blue
Iris virginica	Iridaceae	Blue Flag Iris	42.0597	-87.8414	199.644		James Woodworth Prairie Preserve		native	182	176	204	http://eol.org/data_objects/24994931		0.702381	0.137255	0.8	252.857	14	80	10.2381	1002	Y		http://eol.org/schema/terms/purplish-blue
Verbena hastata	Verbenaceae	Blue Vervain	42.0597	-87.8414	199.644		James Woodworth Prairie Preserve		native	184	166	225	http://eol.org/data_objects/24952643		0.717514	0.262222	0.882353	258.305	26	88	11.7514	1025	Y		http://eol.org/schema/terms/purplish-blue
Lobelia spicata	Campanulaceae	Palespike Lobelia	42.0597	-87.8414	199.644		James Woodworth Prairie Preserve		native	154	154	149	http://eol.org/data_objects/24976780		0.166667	0.0324675	0.603922	60	3	60	-43.3333	1005			http://purl.obolibrary.org/obo/PATO_0000324
Lobelia spicata	Campanulaceae	Palespike Lobelia	42.0597	-87.8414	199.644		James Woodworth Prairie Preserve		native	151	168	207	http://eol.org/data_objects/24976779		0.616071	0.270531	0.811765	221.786	27	81	1.60714	1004			http://eol.org/schema/terms/greenish-blue
Lobelia spicata	Campanulaceae	Palespike Lobelia	42.0597	-87.8414	199.644		James Woodworth Prairie Preserve		native	209	207	220	http://eol.org/data_objects/24976778		0.692308	0.0590909	0.862745	249.231	6	86	9.23077	1003			http://eol.org/schema/terms/purplish-blue
Lobelia spicata	Campanulaceae	Palespike Lobelia	42.0597	-87.8414	199.644		James Woodworth Prairie Preserve		native	202	199	213	http://eol.org/data_objects/24976781		0.702381	0.0657277	0.835294	252.857	7	84	10.2381	1006			http://eol.org/schema/terms/purplish-blue
Symphyotrichum oolentangiense	Asteraceae	Skyblue Aster	42.0597	-87.8414	199.644		James Woodworth Prairie Preserve		native	164	150	211	http://eol.org/data_objects/24998692		0.704918	0.2891	0.827451	253.77	29	83	10.4918	1023	Y		http://eol.org/schema/terms/purplish-blue
Symphyotrichum oolentangiense	Asteraceae	Skyblue Aster	42.0597	-87.8414	199.644		James Woodworth Prairie Preserve		native	177	162	220	http://eol.org/data_objects/24998701		0.70977	0.263636	0.862745	255.517	26	86	10.977	1024	Y		http://eol.org/schema/terms/purplish-blue
Scutellaria parvula	Lamiaceae	Small Skullcap	42.0597	-87.8414	199.644		James Woodworth Prairie Preserve		native	171	158	214	http://eol.org/data_objects/24965123		0.705357	0.261682	0.839216	253.929	26	84	10.5357	1009			http://eol.org/schema/terms/purplish-blue
Scutellaria parvula	Lamiaceae	Small Skullcap	42.0597	-87.8414	199.644		James Woodworth Prairie Preserve		native	150	139	182	http://eol.org/data_objects/24965119		0.709302	0.236264	0.713725	255.349	24	71	10.9302	1007			http://eol.org/schema/terms/purplish-blue
Scutellaria parvula	Lamiaceae	Small Skullcap	42.0597	-87.8414	199.644		James Woodworth Prairie Preserve		native	175	162	205	http://eol.org/data_objects/24965122		0.717054	0.209756	0.803922	258.14	21	80	11.7054	1008			http://eol.org/schema/terms/purplish-blue
Scutellaria parvula	Lamiaceae	Small Skullcap	42.0597	-87.8414	199.644		James Woodworth Prairie Preserve		native	121	103	138	http://eol.org/data_objects/24965126		0.752381	0.253623	0.541176	270.857	25	54	15.2381	1011			http://eol.org/schema/terms/purplish-blue
Scutellaria parvula	Lamiaceae	Small Skullcap	42.0597	-87.8414	199.644		James Woodworth Prairie Preserve		native	170	157	182	http://eol.org/data_objects/24965125		0.753333	0.137363	0.713725	271.2	14	71	15.3333	1010			http://eol.org/schema/terms/purplish-blue
Symphyotrichum laeve var. laeve	Asteraceae	Smooth Blue Aster	42.0597	-87.8414	199.644		James Woodworth Prairie Preserve		native	122	109	166	http://eol.org/data_objects/24997935		0.704678	0.343373	0.65098	253.684	34	65	10.4678	1022	Y		http://eol.org/schema/terms/purplish-blue
Symphyotrichum laeve var. laeve	Asteraceae	Smooth Blue Aster	42.0597	-87.8414	199.644		James Woodworth Prairie Preserve		native	178	164	215	http://eol.org/data_objects/24997937		0.712418	0.237209	0.843137	256.471	24	84	11.2418	1021	Y		http://eol.org/schema/terms/purplish-blue
Symphyotrichum laeve var. laeve	Asteraceae	Smooth Blue Aster	42.0597	-87.8414	199.644		James Woodworth Prairie Preserve		native	140	127	164	http://eol.org/data_objects/24997939		0.725225	0.22561	0.643137	261.081	23	64	12.5225	1020	Y		http://eol.org/schema/terms/purplish-blue
Sisyrinchium albidum	Iridaceae	White Blue-eyed-grass	42.0597	-87.8414	199.644		James Woodworth Prairie Preserve		native	234	233	230	http://eol.org/data_objects/24957649		0.125	0.017094	0.917647	45	2	92	-47.5	1012	Y		http://purl.obolibrary.org/obo/PATO_0001944
Sisyrinchium albidum	Iridaceae	White Blue-eyed-grass	42.0597	-87.8414	199.644		James Woodworth Prairie Preserve		native	197	200	210	http://eol.org/data_objects/24957648		0.628205	0.0619048	0.823529	226.154	6	82	2.82051	1013	Y		http://eol.org/schema/terms/greenish-blue
Symphyotrichum ericoides	Asteraceae	White Heath Aster	42.0597	-87.8414	199.644		James Woodworth Prairie Preserve		native	246	246	235	http://eol.org/data_objects/24951220		0.166667	0.0447154	0.964706	60	4	96	-43.3333	1014			http://purl.obolibrary.org/obo/PATO_0000324
Symphyotrichum ericoides	Asteraceae	White Heath Aster	42.0597	-87.8414	199.644		James Woodworth Prairie Preserve		native	220	221	212	http://eol.org/data_objects/24951223		0.185185	0.040724	0.866667	66.6667	4	87	-41.4815	1017			http://purl.obolibrary.org/obo/PATO_0001941
Symphyotrichum ericoides	Asteraceae	White Heath Aster	42.0597	-87.8414	199.644		James Woodworth Prairie Preserve		native	229	230	224	http://eol.org/data_objects/24951221		0.194444	0.026087	0.901961	70	3	90	-40.5556	1015			http://purl.obolibrary.org/obo/PATO_0001941
Symphyotrichum ericoides	Asteraceae	White Heath Aster	42.0597	-87.8414	199.644		James Woodworth Prairie Preserve		native	221	222	218	http://eol.org/data_objects/24951222		0.208333	0.018018	0.870588	75	2	87	-39.1667	1016			http://purl.obolibrary.org/obo/PATO_0001941
Symphyotrichum ericoides	Asteraceae	White Heath Aster	42.0597	-87.8414	199.644		James Woodworth Prairie Preserve		native	242	243	241	http://eol.org/data_objects/24998686		0.25	0.00823045	0.952941	90	1	95	-35	1018			http://purl.obolibrary.org/obo/PATO_0001941
Symphyotrichum ericoides	Asteraceae	White Heath Aster	42.0597	-87.8414	199.644		James Woodworth Prairie Preserve		native	238	245	247	http://eol.org/data_objects/24998687		0.537037	0.0364372	0.968627	193.333	4	97	-6.2963	1019			http://eol.org/schema/terms/greenish-blue
Symphyotrichum laeve	Asteraceae	Smooth Blue Aster	42.1406	-87.8316	203		Somme Prairie Grove, IL		native	84	205	246	http://eol.org/data_objects/25351757		0.542181	0.658537	0.964706	195.185	66	96	-5.78189	155	Y		http://eol.org/schema/terms/greenish-blue
Symphyotrichum ericoides	Asteraceae	White Heath Aster	42.1406	-87.8316	203		Somme Prairie Grove, IL		native	214	251	254	http://eol.org/data_objects/25398429		0.5125	0.15748	0.996078	184.5	16	100	-8.75	154			http://eol.org/schema/terms/greenish-blue
Ionactis linariifolia	Asteracea	Savoryleaf Aster	41.0009	-87.5519	206		Hooper Branch Savanna Nature Preserve in Iroquois County, Illinois		native	182	166	202	http://eol.org/data_objects/24108970		0.740741	0.178218	0.792157	266.667	18	79	14.0741	812			http://eol.org/schema/terms/purplish-blue
Ionactis linariifolia	Asteracea	Savoryleaf Aster	41.0009	-87.5519	206		Hooper Branch Savanna Nature Preserve in Iroquois County, Illinois		native	198	177	215	http://eol.org/data_objects/24108968		0.758772	0.176744	0.843137	273.158	18	84	15.8772	811			http://eol.org/schema/terms/purplish-blue
Commelina erecta	Commelinaceae	Whitemouth Dayflower	41.0009	-87.5519	206		Hooper Branch Savanna Nature Preserve in Iroquois County, Illinois		native	102	124	205	http://eol.org/data_objects/24107214		0.631068	0.502439	0.803922	227.184	50	80	3.1068	810			http://eol.org/schema/terms/greenish-blue
Lobelia kalmii	Campanulaceae	Kalm's Lobelia	41.6216	-87.3992	181		Clark and Pine Nature Preserve, Indiana		native	202	188	217	http://eol.org/data_objects/1341603		0.747126	0.133641	0.85098	268.966	13	85	14.7126	834			http://eol.org/schema/terms/purplish-blue
Lobelia kalmii	Campanulaceae	Kalm's Lobelia	41.6216	-87.3992	181		Clark and Pine Nature Preserve, Indiana		native	139	124	147	http://eol.org/data_objects/1341602		0.775362	0.156463	0.576471	279.13	16	58	17.5362	833			http://eol.org/schema/terms/purplish-blue
Ionactis linariifolia	Asteracea	Savoryleaf Aster	41.5934	-87.3464	184		Gary School Site, Indiana		native	189	168	221	http://eol.org/data_objects/1341584	approximate	0.732704	0.239819	0.866667	263.774	24	87	13.2704	831			http://eol.org/schema/terms/purplish-blue
Viola sororia	Violaceae	Hooded Blue Violet	41.6191	-87.26	181		Marquette Park. Lake. Indiana		native	125	76	163	http://eol.org/data_objects/2139032		0.760536	0.533742	0.639216	273.793	53	64	16.0536	832	Y		http://eol.org/schema/terms/purplish-blue
Lobelia kalmii	Campanulaceae	Kalm's Lobelia	41.5759	-87.1761	194		Portage Parks, Indiana		native	231	217	248	http://eol.org/data_objects/1341604		0.741935	0.125	0.972549	267.097	13	97	14.1935	830			http://eol.org/schema/terms/purplish-blue
Commelina erecta	Commelinaceae	Whitemouth Dayflower	36.3062	-87.1279	118		Bicentennial Trail near Sycamore Creek, Ashland City, Cheatham County, Tennessee		native	103	135	230	http://eol.org/data_objects/20820740		0.624672	0.552174	0.901961	224.882	55	90	2.46719	398			http://eol.org/schema/terms/greenish-blue
Commelina erecta	Commelinaceae	Whitemouth Dayflower	36.3062	-87.1279	118		Bicentennial Trail near Sycamore Creek, Ashland City, Cheatham County, Tennessee		native	80	97	167	http://eol.org/data_objects/20820744		0.6341	0.520958	0.654902	228.276	52	65	3.40996	397			http://eol.org/schema/terms/greenish-blue
Lupinus obtusilobus	Fabaceae	Blunt-lobe Lupine	41.6583	-87.0626	183		Indiana Dunes State Park in NW Indiana		native	148	143	189	http://eol.org/data_objects/24107784		0.684783	0.243386	0.741176	246.522	24	74	8.47826	835			http://eol.org/schema/terms/purplish-blue
Viola cucullata	Violaceae	Marsh Blue Violet	41.6583	-87.0626	183		Indiana Dunes State Park in NW Indiana		native	137	119	186	http://eol.org/data_objects/24110341		0.711443	0.360215	0.729412	256.119	36	73	11.1443	836	Y		http://eol.org/schema/terms/purplish-blue
Ipomoea purpurea	Convolvulaceae	Common Morning Glory	36.389	-87.0147	223		Pleasant View, Cheatham County, Tennessee		introduced	158	83	191	http://eol.org/data_objects/12605056		0.782407	0.565445	0.74902	281.667	57	75	18.2407	38			http://eol.org/schema/terms/purplish-blue
Lactuca floridana	Asteraceae	Blue Woodland Lettuce	36.3837	-87.0077	200		Keri Dr., Pleasant View, Cheatham County, Tennessee		native	176	174	244	http://eol.org/data_objects/20820907		0.671429	0.286885	0.956863	241.714	29	96	7.14286	37	Y		http://eol.org/schema/terms/purplish-blue
Lactuca floridana	Asteraceae	Blue Woodland Lettuce	36.3837	-87.0077	200		Keri Dr., Pleasant View, Cheatham County, Tennessee		native	156	149	217	http://eol.org/data_objects/20820899		0.683824	0.313364	0.85098	246.176	31	85	8.38235	34	Y		http://eol.org/schema/terms/purplish-blue
Lactuca floridana	Asteraceae	Blue Woodland Lettuce	36.3837	-87.0077	200		Keri Dr., Pleasant View, Cheatham County, Tennessee		native	168	156	238	http://eol.org/data_objects/20820898		0.691057	0.344538	0.933333	248.78	34	93	9.10569	33	Y		http://eol.org/schema/terms/purplish-blue
Lactuca floridana	Asteraceae	Blue Woodland Lettuce	36.3837	-87.0077	200		Keri Dr., Pleasant View, Cheatham County, Tennessee		native	133	119	183	http://eol.org/data_objects/20820901		0.703125	0.349727	0.717647	253.125	35	72	10.3125	36	Y		http://eol.org/schema/terms/purplish-blue
Lactuca floridana	Asteraceae	Blue Woodland Lettuce	36.3837	-87.0077	200		Keri Dr., Pleasant View, Cheatham County, Tennessee		native	122	105	179	http://eol.org/data_objects/20820900		0.704955	0.413408	0.701961	253.784	41	70	10.4955	35	Y		http://eol.org/schema/terms/purplish-blue
Houstonia pusilla	Lamiaceae	Tiny Bluet	36.3837	-87.0077	200		Keri Dr., Pleasant View, Cheatham County, Tennessee		native	89	107	187	http://eol.org/data_objects/19896889		0.636054	0.524064	0.733333	228.98	52	73	3.60544	32	Y		http://eol.org/schema/terms/greenish-blue
Houstonia pusilla	Lamiaceae	Tiny Bluet	36.3837	-87.0077	200		Keri Dr., Pleasant View, Cheatham County, Tennessee		native	140	105	153	http://eol.org/data_objects/25009163		0.788194	0.313725	0.6	283.75	31	60	18.8194	31	Y		http://eol.org/schema/terms/purplish-blue
Viola dactyloides	Violaceae	Trilobed Violet	36.2588	-86.9198	226		Beaman Park, Davidson County, Tennessee		native	127	114	209	http://eol.org/data_objects/21888383		0.689474	0.454545	0.819608	248.211	45	82	8.94737	394			http://eol.org/schema/terms/purplish-blue
Viola dactyloides	Violaceae	Trilobed Violet	36.2588	-86.9198	226		Beaman Park, Davidson County, Tennessee		native	116	89	210	http://eol.org/data_objects/21888377		0.703857	0.57619	0.823529	253.388	58	82	10.3857	393			http://eol.org/schema/terms/purplish-blue
Sisyrinchium albidum	Iridaceae	White Blue-eyed-grass	36.2588	-86.9198	226		Beaman Park, Davidson County, Tennessee		native	136	137	154	http://eol.org/data_objects/21888085		0.657407	0.116883	0.603922	236.667	12	60	5.74074	392	Y		http://eol.org/schema/terms/greenish-blue
Sisyrinchium albidum	Iridaceae	White Blue-eyed-grass	36.2588	-86.9198	226		Beaman Park, Davidson County, Tennessee		native	191	189	198	http://eol.org/data_objects/21888088		0.703704	0.0454545	0.776471	253.333	5	78	10.3704	391	Y		http://eol.org/schema/terms/purplish-blue
Blephilia hirsuta	Lamiaceae	Hairy Pagoda-plant	36.0527	-86.9093	199		near Nature Center, Edwin Warner Park, Nashville, Davidson County, Tennessee, US		native	203	190	229	http://eol.org/data_objects/21888808		0.722222	0.170306	0.898039	260	17	90	12.2222	364			http://eol.org/schema/terms/purplish-blue
Blephilia hirsuta	Lamiaceae	Hairy Pagoda-plant	36.0527	-86.9093	199		near Nature Center, Edwin Warner Park, Nashville, Davidson County, Tennessee, US		native	164	155	169	http://eol.org/data_objects/21888809		0.77381	0.0828402	0.662745	278.571	8	66	17.381	365			http://eol.org/schema/terms/purplish-blue
Blephilia hirsuta	Lamiaceae	Hairy Pagoda-plant	36.0527	-86.9093	199		near Nature Center, Edwin Warner Park, Nashville, Davidson County, Tennessee, US		native	169	162	172	http://eol.org/data_objects/21888807		0.783333	0.0581395	0.67451	282	6	67	18.3333	363			http://eol.org/schema/terms/purplish-blue
Blephilia hirsuta	Lamiaceae	Hairy Pagoda-plant	36.0527	-86.9093	199		near Nature Center, Edwin Warner Park, Nashville, Davidson County, Tennessee, US		native	164	153	168	http://eol.org/data_objects/21888806		0.788889	0.0892857	0.658824	284	9	66	18.8889	362			http://eol.org/schema/terms/purplish-blue
Campanula americana	Campanulaceae	American Bellflower	36.0662	-86.8872	205		Percy Warner Park, Nashville, Davidson County, Tennessee, US		native	109	74	178	http://eol.org/data_objects/12604467		0.722756	0.58427	0.698039	260.192	58	70	12.2756	372			http://eol.org/schema/terms/purplish-blue
Iodanthus pinnatifidus	Brassicaceae	Purplerocket	36.0745	-86.884	197		Deep Wells picnic area, Percy Warner Park, Nashville, Davidson County, Tennessee		native	174	180	186	http://eol.org/data_objects/20607717		0.583333	0.0645161	0.729412	210	6	73	-1.66667	29		Y	http://eol.org/schema/terms/greenish-blue
Iodanthus pinnatifidus	Brassicaceae	Purplerocket	36.0695	-86.8837	257		Percy Warner Park, Nashville, Davidson County, Tennessee		native	153	153	232	http://eol.org/data_objects/20607708		0.666667	0.340517	0.909804	240	34	91	6.66667	27		Y	http://purl.obolibrary.org/obo/PATO_0000318
Iodanthus pinnatifidus	Brassicaceae	Purplerocket	36.0695	-86.8837	257		Percy Warner Park, Nashville, Davidson County, Tennessee		native	214	201	238	http://eol.org/data_objects/20607707		0.725225	0.155462	0.933333	261.081	16	93	12.5225	28		Y	http://eol.org/schema/terms/purplish-blue
Iodanthus pinnatifidus	Brassicaceae	Purplerocket	36.0695	-86.8837	257		Percy Warner Park, Nashville, Davidson County, Tennessee		native	167	157	181	http://eol.org/data_objects/20607704		0.736111	0.132597	0.709804	265	13	71	13.6111	25		Y	http://eol.org/schema/terms/purplish-blue
Iodanthus pinnatifidus	Brassicaceae	Purplerocket	36.0695	-86.8837	257		Percy Warner Park, Nashville, Davidson County, Tennessee		native	215	184	247	http://eol.org/data_objects/20607705		0.748677	0.255061	0.968627	269.524	26	97	14.8677	26		Y	http://eol.org/schema/terms/purplish-blue
Cynoglossum virginianum	Boraginaceae	Wild Comfrey	36.0626	-86.8796	209		Percy Warner Park, Davidson County, Tennessee		native	166	189	238	http://eol.org/data_objects/21888457		0.613426	0.302521	0.933333	220.833	30	93	1.34259	995			http://eol.org/schema/terms/greenish-blue
Cynoglossum virginianum	Boraginaceae	Wild Comfrey	36.0626	-86.8796	209		Percy Warner Park, Davidson County, Tennessee		native	172	175	199	http://eol.org/data_objects/21888458		0.648148	0.135678	0.780392	233.333	14	78	4.81481	996			http://eol.org/schema/terms/greenish-blue
Cynoglossum virginianum	Boraginaceae	Wild Comfrey	36.0626	-86.8796	209		Percy Warner Park, Davidson County, Tennessee		native	201	202	226	http://eol.org/data_objects/21888461		0.66	0.110619	0.886275	237.6	11	89	6	997			http://eol.org/schema/terms/greenish-blue
Conoclinium coelestinum	Asteraceae	Blue Mistflower	36.0899	-86.8782	192		Cheekwood Botanical Garden, Nashville, Davidson County, Tennessee		native	169	153	237	http://eol.org/data_objects/19896573		0.698413	0.35443	0.929412	251.429	35	93	9.84127	30	Y		http://eol.org/schema/terms/purplish-blue
Viola sororia	Violaceae	Hooded Blue Violet	36.1444	-86.8027	173		Vanderbilt University, Nashville, Davidson County, Tennessee		native	119	109	205	http://eol.org/data_objects/21887921		0.684028	0.468293	0.803922	246.25	47	80	8.40278	389	Y		http://eol.org/schema/terms/purplish-blue
Iodanthus pinnatifidus	Brassicaceae	Purplerocket	36.0581	-86.7971	240		Radnor Lake State Natural Area, Nashville, Davidson County, Tennessee		native	204	209	236	http://eol.org/data_objects/20607712		0.640625	0.135593	0.92549	230.625	14	93	4.0625	23		Y	http://eol.org/schema/terms/greenish-blue
Iodanthus pinnatifidus	Brassicaceae	Purplerocket	36.0581	-86.7971	240		Radnor Lake State Natural Area, Nashville, Davidson County, Tennessee		native	228	212	249	http://eol.org/data_objects/20607709		0.738739	0.148594	0.976471	265.946	15	98	13.8739	20		Y	http://eol.org/schema/terms/purplish-blue
Iodanthus pinnatifidus	Brassicaceae	Purplerocket	36.0581	-86.7971	240		Radnor Lake State Natural Area, Nashville, Davidson County, Tennessee		native	238	231	245	http://eol.org/data_objects/20607713		0.75	0.0571429	0.960784	270	6	96	15	22		Y	http://eol.org/schema/terms/purplish-blue
Iodanthus pinnatifidus	Brassicaceae	Purplerocket	36.0581	-86.7971	240		Radnor Lake State Natural Area, Nashville, Davidson County, Tennessee		native	166	162	166	http://eol.org/data_objects/20607710		0.833333	0.0240964	0.65098	300	2	65	23.3333	21		Y	http://purl.obolibrary.org/obo/PATO_0000321
Nemophila aphylla	Boraginaceae	Small-flower Baby-blue-eyes	36.0581	-86.7971	240		Radnor Lake State Natural Area, Nashville, Davidson County, Tennessee		native	240	253	254	http://eol.org/data_objects/22702698		0.511905	0.0551181	0.996078	184.286	6	100	-8.80952	24	Y		http://eol.org/schema/terms/greenish-blue
Campanula americana	Campanulaceae	American Bellflower	36.0573	-86.7963	240		east end of Lake Trail, Radnor Lake State Natural Area, Nashville, Davidson County, Tennessee, US		native	91	93	141	http://eol.org/data_objects/20820448		0.66	0.35461	0.552941	237.6	35	55	6	366			http://eol.org/schema/terms/greenish-blue
Nemophila aphylla	Boraginaceae	Small-flower Baby-blue-eyes	36.0638	-86.7905	335		Ganier Ridge Trail, Radnor Lake State Natural Area, Nashville, Davidson County, Tennessee		native	123	123	123	http://eol.org/data_objects/22577787		0	0	0.482353	0	0	48	-60	368	Y		http://purl.obolibrary.org/obo/PATO_0000322
Nemophila aphylla	Boraginaceae	Small-flower Baby-blue-eyes	36.0638	-86.7905	335		Ganier Ridge Trail, Radnor Lake State Natural Area, Nashville, Davidson County, Tennessee		native	169	170	161	http://eol.org/data_objects/22577791		0.185185	0.0529412	0.666667	66.6667	5	67	-41.4815	371	Y		http://purl.obolibrary.org/obo/PATO_0001941
Nemophila aphylla	Boraginaceae	Small-flower Baby-blue-eyes	36.0638	-86.7905	335		Ganier Ridge Trail, Radnor Lake State Natural Area, Nashville, Davidson County, Tennessee		native	201	202	200	http://eol.org/data_objects/22577786		0.25	0.00990099	0.792157	90	1	79	-35	367	Y		http://purl.obolibrary.org/obo/PATO_0001941
Nemophila aphylla	Boraginaceae	Small-flower Baby-blue-eyes	36.0638	-86.7905	335		Ganier Ridge Trail, Radnor Lake State Natural Area, Nashville, Davidson County, Tennessee		native	205	207	204	http://eol.org/data_objects/22577789		0.277778	0.0144928	0.811765	100	1	81	-32.2222	370	Y		http://purl.obolibrary.org/obo/PATO_0001941
Nemophila aphylla	Boraginaceae	Small-flower Baby-blue-eyes	36.0638	-86.7905	335		Ganier Ridge Trail, Radnor Lake State Natural Area, Nashville, Davidson County, Tennessee		native	209	212	213	http://eol.org/data_objects/22577788		0.541667	0.0187793	0.835294	195	2	84	-5.83333	369	Y		http://eol.org/schema/terms/greenish-blue
Viola sororia	Violaceae	Hooded Blue Violet	36.1191	-86.7888	167		Sevier Park, Nashville, Davidson County, Tennessee		native	132	109	164	http://eol.org/data_objects/13224568		0.736364	0.335366	0.643137	265.091	34	64	13.6364	384	Y		http://eol.org/schema/terms/purplish-blue
Sisyrinchium albidum	Iridaceae	White Blue-eyed-grass	36.0726	-86.5881	156		Mount View Cedar Glade Preserve, Nashville, Davidson County, Tennessee		native	126	125	214	http://eol.org/data_objects/20607673		0.668539	0.415888	0.839216	240.674	42	84	6.85393	374	Y		http://eol.org/schema/terms/purplish-blue
Sisyrinchium albidum	Iridaceae	White Blue-eyed-grass	36.0726	-86.5881	156		Mount View Cedar Glade Preserve, Nashville, Davidson County, Tennessee		native	64	60	152	http://eol.org/data_objects/20607674		0.673913	0.605263	0.596078	242.609	61	60	7.3913	373	Y		http://eol.org/schema/terms/purplish-blue
Baptisia australis	Fabaceae	Blue Wild Indigo	36.0941	-86.5576	161		Long Hunter State Park - Bryant Grove Trail, Davidson County, Tennessee		native	146	110	165	http://eol.org/data_objects/22948205		0.775758	0.333333	0.647059	279.273	33	65	17.5758	379	Y		http://eol.org/schema/terms/purplish-blue
Baptisia australis	Fabaceae	Blue Wild Indigo	36.0941	-86.5576	161		Long Hunter State Park - Bryant Grove Trail, Davidson County, Tennessee		native	116	89	130	http://eol.org/data_objects/22948203		0.776423	0.315385	0.509804	279.512	32	51	17.6423	378	Y		http://eol.org/schema/terms/purplish-blue
Baptisia australis	Fabaceae	Blue Wild Indigo	36.0941	-86.5576	161		Long Hunter State Park - Bryant Grove Trail, Davidson County, Tennessee		native	169	131	170	http://eol.org/data_objects/22948206		0.82906	0.229412	0.666667	298.462	23	67	22.906	380	Y		http://eol.org/schema/terms/purplish-blue
Scutellaria parvula	Lamiaceae	Small Skullcap	36.0941	-86.5576	161		Long Hunter State Park, Bryant Grove Trail, Davidson County, Tennessee		native	169	111	180	http://eol.org/data_objects/22948028		0.806763	0.383333	0.705882	290.435	38	71	20.6763	381			http://eol.org/schema/terms/purplish-blue
Lobelia spicata	Campanulaceae	Palespike Lobelia	36.0773	-86.3947	188		Vesta Cedar Glade State Natural Area, Wilson County, Tennessee		native	178	188	234	http://eol.org/data_objects/22513796		0.636905	0.239316	0.917647	229.286	24	92	3.69048	998			http://eol.org/schema/terms/greenish-blue
Iris virginica	Iridaceae	Blue Flag Iris	41.8659	-86.3456	221		Bakertown Fen in Berrien County, Michigan		native	225	204	210	http://eol.org/data_objects/24962400		0.952381	0.0933333	0.882353	342.857	9	88	35.2381	841	Y		http://eol.org/schema/terms/reddish-purple
Scutellaria parvula	Lamiaceae	Small Skullcap	35.8629	-86.3	222		near Factory Road, Rutherford County, Tennessee		native	136	132	227	http://eol.org/data_objects/20607964	approximate	0.673684	0.418502	0.890196	242.526	42	89	7.36842	346			http://eol.org/schema/terms/purplish-blue
Scutellaria parvula	Lamiaceae	Small Skullcap	35.8629	-86.3	222		near Factory Road, Rutherford County, Tennessee		native	167	154	240	http://eol.org/data_objects/20607967	approximate	0.69186	0.358333	0.941176	249.07	36	94	9.18605	347			http://eol.org/schema/terms/purplish-blue
Collinsia verna	Plantaginaceae	Spring Blue Eyed Mary	36.3972	-86.2755	196		South of Taylor Hollow Natural Area, TN, Sumner County, Tennessee		native	106	130	178	http://eol.org/data_objects/22948216	approximate	0.611111	0.404494	0.698039	22	40	70	1.11111	402	Y		http://eol.org/schema/terms/orangish-red
Lobelia siphilitica	Campanulaceae	Great Blue Lobelia	42.9312	-86.0963	190		Pigeon Creek Park		native	32	53	159	http://eol.org/data_objects/1387271		0.639108	0.798742	0.623529	230.079	80	62	3.91076	908	Y		http://eol.org/schema/terms/greenish-blue
Eryngium integrifolium	Apiaceae	Blueflower Eryngo	35.4516	-86.0245	333		May Prairie Natural Area, TN, Coffee County, Tennessee		native	115	121	145	http://eol.org/data_objects/22948299		0.633333	0.206897	0.568627	228	21	57	3.33333	329	Y		http://eol.org/schema/terms/greenish-blue
Lupinus obtusilobus	Fabaceae	Blunt-lobe Lupine	42.587	-85.998	201		2200–2298 46th St, Allegan, Michigan		native	153	119	187	http://eol.org/data_objects/24839932		0.75	0.363636	0.733333	270	36	73	15	156			http://eol.org/schema/terms/purplish-blue
Viola cucullata	Violaceae	Marsh Blue Violet	42.2917	-85.5872	247		Kalamazoo, Michigan		native	122	94	191	http://eol.org/data_objects/24993997		0.714777	0.507853	0.74902	257.32	51	75	11.4777	880	Y		http://eol.org/schema/terms/purplish-blue
Verbena hastata	Verbenaceae	Blue Vervain	42.2012	-85.58	266		Portage, Michigan		native	166	146	228	http://eol.org/data_objects/24994545		0.707317	0.359649	0.894118	254.634	36	89	10.7317	857	Y		http://eol.org/schema/terms/purplish-blue
Lobelia spicata	Campanulaceae	Palespike Lobelia	36.0773	-85.3947	188		Vesta Cedar Glade State Natural Area, Wilson County, Tennessee		native	169	169	170	http://eol.org/data_objects/22513797		0.666667	0.00588235	0.666667	240	1	67	6.66667	999			http://purl.obolibrary.org/obo/PATO_0000318
Viola labradorica	Violaceae	American Dog Violet	41.5542	-84.3608	226		Goll Woods in NW Ohio		native	146	142	160	http://eol.org/data_objects/24111424		0.703704	0.1125	0.627451	253.333	11	63	10.3704	829			http://eol.org/schema/terms/purplish-blue
Duranta erecta	Verbenaceae	Golden Dewdrop	10.0059	-84.2727	827		La Garita, Alajuela, Costa Rica	No		187	167	210	http://eol.org/data_objects/17749252		0.744186	0.204762	0.823529	267.907	20	82	14.4186	176			http://eol.org/schema/terms/purplish-blue
Viola sororia var. missouriensis	Violaceae	Sand Violet	35.6754	-83.7557	324		Tennessee, Townsend		native	245	185	206	http://eol.org/data_objects/22728762		0.941667	0.244898	0.960784	339	24	96	34.1667	336			http://eol.org/schema/terms/reddish-purple
Sisyrinchium montanum	Iridaceae	Strict Blue-eyed-grass	35.6854	-83.5367	450		Tennessee, Great Smoky Mountains National Park, Sugarlands Visitor Center		native	246	246	243	http://eol.org/data_objects/22730789		0.166667	0.0121951	0.964706	60	1	96	-43.3333	337	Y		http://purl.obolibrary.org/obo/PATO_0000324
Duranta erecta	Verbenaceae	Golden Dewdrop	8.66667	-83.5	25		Charcos, Puntarenas, Costa Rica	No		161	177	179	http://eol.org/data_objects/24889491		0.518519	0.100559	0.701961	186.667	10	70	-8.14815	175			http://eol.org/schema/terms/greenish-blue
Polemonium reptans	Polemoniaceae	Greek Valerian	38.7599	-83.4075	239		Lynx Prairie, OH		native	121	113	147	http://eol.org/data_objects/25084163		0.705882	0.231293	0.576471	254.118	23	58	10.5882	101			http://eol.org/schema/terms/purplish-blue
Ipomoea purpurea	Convolvulaceae	Common Morning Glory	42.6875	-83.2341	296		Auburn Hills, Michigan		introduced	137	69	225	http://eol.org/data_objects/24996726		0.739316	0.693333	0.882353	266.154	69	88	13.9316	891			http://eol.org/schema/terms/purplish-blue
Verbena hastata	Verbenaceae	Blue Vervain	40.3587	-82.7542	373		Morrow, US-OH, Davidson Swamp		native	158	137	190	http://eol.org/data_objects/25351823		0.732704	0.278947	0.745098	263.774	28	75	13.2704	134	Y		http://eol.org/schema/terms/purplish-blue
Sisyrinchium albidum	Iridaceae	White Blue-eyed-grass	27.8369	-82.6345	2		Mt. Saxon Ave, Americana Cove, FL		native	160	167	219	http://eol.org/data_objects/25004920		0.646893	0.269406	0.858824	232.881	27	86	4.68927	190	Y		http://eol.org/schema/terms/greenish-blue
Sisyrinchium angustifolium	Iridaceae	Strict Blue-eyed Grass	29.1994	-82.578	20		Goethe State Forest, Levy County, FL		native	122	118	236	http://eol.org/data_objects/24910537		0.672316	0.5	0.92549	242.034	50	93	7.23164	198	Y		http://eol.org/schema/terms/purplish-blue
Duranta erecta	Verbenaceae	Golden Dewdrop	29.6516	-82.3248	45		Gainesville, Florida		native	201	164	237	http://eol.org/data_objects/19855877		0.751142	0.308017	0.929412	270.411	31	93	15.1142	199			http://eol.org/schema/terms/purplish-blue
Commelina erecta	Commelinaceae	Whitemouth Dayflower	27.6443	-82.3175	5		Little Manatee River, Manatee County, Florida		native	121	150	213	http://eol.org/data_objects/18593436		0.61413	0.431925	0.835294	221.087	43	84	1.41304	189			http://eol.org/schema/terms/greenish-blue
Salvia misella	Lamiaceae	River Sage	27.9904	-82.3018	19		Hillsborough County, Florida		native	60	91	184	http://eol.org/data_objects/24909341		0.625	0.673913	0.721569	225	67	72	2.5	191			http://eol.org/schema/terms/greenish-blue
Sisyrinchium angustifolium	Iridaceae	Strict Blue-eyed Grass	41.1145	-82.0544	294		Letha House Park East		native	133	148	203	http://eol.org/data_objects/25351056		0.630952	0.344828	0.796078	227.143	34	80	3.09524	142	Y		http://eol.org/schema/terms/greenish-blue
Conradina grandiflora	Lamiaceae	Largeflower False Rosemary	28.7332	-81.873	27		Palatlakaha Environmental and Agricultural Reserve, P.E.A.R., Lake County, FL		native	194	197	237	http://eol.org/data_objects/22474169		0.655039	0.181435	0.929412	235.814	18	93	5.50388	197			http://eol.org/schema/terms/greenish-blue
Lobelia siphilitica	Campanulaceae	Great Blue Lobelia	41.1441	-81.8231	282		Lake Medina, Medina OH		native	177	194	246	http://eol.org/data_objects/22742466		0.625604	0.280488	0.964706	225.217	28	96	2.56039	146	Y		http://eol.org/schema/terms/greenish-blue
Campanula americana	Campanulaceae	American Bellflower	36.0932	-81.8132	1328		underneath the Linn Cove Viaduct along the Blue Ridge Parkway, Grandfather, NC		native	146	132	176	http://eol.org/data_objects/16883907		0.719697	0.25	0.690196	259.091	25	69	11.9697	377			http://eol.org/schema/terms/purplish-blue
Lobelia siphilitica	Campanulaceae	Great Blue Lobelia	41.3063	-81.7941	260		Mill Stream Run Reservation, Ohio		native	157	155	240	http://eol.org/data_objects/22428301		0.670588	0.354167	0.941176	241.412	35	94	7.05882	151	Y		http://eol.org/schema/terms/purplish-blue
Verbena hastata	Verbenaceae	Blue Vervain	41.1928	-81.6951	325		Allardale county park, Medina county, Ohio		native	189	161	243	http://eol.org/data_objects/25398979		0.723577	0.337449	0.952941	260.488	34	95	12.3577	147	Y		http://eol.org/schema/terms/purplish-blue
Commelina erecta	Commelinaceae	Whitemouth Dayflower	33.2963	-81.6661	65		Aiken, SC		native	63	116	204	http://eol.org/data_objects/23361200		0.604019	0.691176	0.8	217.447	69	80	0.401891	9			http://eol.org/schema/terms/greenish-blue
Iris virginica	Iridaceae	Blue Flag Iris	26.3736	-81.6036	6		Corkscrew Swamp Sanctuary, Florida		native	111	105	138	http://eol.org/data_objects/12517293		0.69697	0.23913	0.541176	250.909	24	54	9.69697	184	Y		http://eol.org/schema/terms/purplish-blue
Iris virginica	Iridaceae	Blue Flag Iris	26.3736	-81.6036	6		Corkscrew Swamp Sanctuary, Florida		native	154	145	168	http://eol.org/data_objects/12517292		0.731884	0.136905	0.658824	263.478	14	66	13.1884	183	Y		http://eol.org/schema/terms/purplish-blue
Sisyrinchium angustifolium	Iridaceae	Strict Blue-eyed Grass	41.1406	-81.577	319		F.A. Seiberling Nature Realm		native	170	161	228	http://eol.org/data_objects/21948150		0.689055	0.29386	0.894118	248.06	29	89	8.90547	145	Y		http://eol.org/schema/terms/purplish-blue
Lobelia siphilitica	Campanulaceae	Great Blue Lobelia	41.1293	-81.5448	249		Sand Run Metro Park , OH		native	180	204	247	http://eol.org/data_objects/22428205		0.606965	0.271255	0.968627	218.507	27	97	0.696517	143	Y		http://eol.org/schema/terms/greenish-blue
Lobelia siphilitica	Campanulaceae	Great Blue Lobelia	41.1298	-81.4306	336		Munroe Falls Metro Park/Lake Area, OH		native	96	112	249	http://eol.org/data_objects/22387933		0.649237	0.614458	0.976471	233.725	61	98	4.92375	144	Y		http://eol.org/schema/terms/greenish-blue
Brodiaea coronaria	Asparagaceae	Crown Brodiaea	41.1346	-81.4203	301		Naches Trail Preserve, Pierce County, Washington		native	149	103	197	http://eol.org/data_objects/13502637		0.748227	0.477157	0.772549	269.362	48	77	14.8227	815			http://eol.org/schema/terms/purplish-blue
Polemonium reptans	Polemoniaceae	Greek Valerian	41.2981	-81.397	306		Tinkers Creek State Nature Preserve		native	121	122	183	http://eol.org/data_objects/24626147		0.663978	0.338798	0.717647	239.032	34	72	6.39785	150			http://eol.org/schema/terms/greenish-blue
Symphyotrichum cordifolium	Asteraceae	Lowrie's Blue Wood Aster	41.2812	-81.3946	308		Tinkers Creek State Nature Preserve		native	159	170	205	http://eol.org/data_objects/22497173		0.626812	0.22439	0.803922	225.652	22	80	2.68116	149	Y		http://eol.org/schema/terms/greenish-blue
Symphyotrichum laeve	Asteraceae	Smooth Blue Aster	42.9617	-81.3875	201		Middlesex, Ontario, CA		native	192	197	216	http://eol.org/data_objects/25397791		0.631944	0.111111	0.847059	227.5	11	85	3.19444	157	Y		http://eol.org/schema/terms/greenish-blue
Symphyotrichum laeve	Asteraceae	Smooth Blue Aster	42.9638	-81.3865	228		Middlesex, Ontario, CA		native	194	192	205	http://eol.org/data_objects/22464062		0.692308	0.0634146	0.803922	249.231	6	80	9.23077	159	Y		http://eol.org/schema/terms/purplish-blue
Symphyotrichum ericoides	Asteraceae	White Heath Aster	42.9638	-81.3865	228		Middlesex, Ontario, CA		native	239	244	252	http://eol.org/data_objects/22464187		0.602564	0.0515873	0.988235	216.923	5	99	0.25641	158			http://eol.org/schema/terms/greenish-blue
Symphyotrichum cordifolium	Asteraceae	Lowrie's Blue Wood Aster	41.0604	-81.3551	333		Mogadore Reservoir, OH		native	173	182	214	http://eol.org/data_objects/22496378		0.630081	0.191589	0.839216	226.829	19	84	3.00813	140	Y		http://eol.org/schema/terms/greenish-blue
Symphyotrichum cordifolium	Asteraceae	Lowrie's Blue Wood Aster	41.0604	-81.3551	333		Mogadore Reservoir, OH		native	194	199	245	http://eol.org/data_objects/22496380		0.650327	0.208163	0.960784	234.118	21	96	5.03268	139	Y		http://eol.org/schema/terms/greenish-blue
Symphyotrichum cordifolium	Asteraceae	Lowrie's Blue Wood Aster	41.2758	-81.1417	323		6947 Hankee Rd, Garrettsville, Ohio,		native	140	130	174	http://eol.org/data_objects/22574560		0.704545	0.252874	0.682353	253.636	25	68	10.4545	148	Y		http://eol.org/schema/terms/purplish-blue
Bacopa caroliniana	Plantaginaceae	Blue Waterhyssop	28.5286	-81.0962	18		Pine Lily Preserve, Bithlo, Florida		native	173	150	247	http://eol.org/data_objects/19215817		0.706186	0.392713	0.968627	254.227	39	97	10.6186	6	Y		http://eol.org/schema/terms/purplish-blue
Commelina erecta	Commelinaceae	Whitemouth Dayflower	28.5364	-81.0176	12		Christmas, Florida		native	90	146	249	http://eol.org/data_objects/20816974		0.607966	0.638554	0.976471	218.868	64	98	0.796646	194			http://eol.org/schema/terms/greenish-blue
Sisyrinchium angustifolium	Iridaceae	Strict Blue-eyed Grass	28.4978	-80.999	12		Tosohatchee WMA, Orange County, FL		native	91	83	190	http://eol.org/data_objects/24947436		0.679128	0.563158	0.745098	244.486	56	75	7.91277	192	Y		http://eol.org/schema/terms/purplish-blue
Viola dactyloides	Violaceae	Trilobed Violet	28.4978	-80.999	12		Tosohatchee Wildlife Management Area, Orange County, FL		native	154	134	218	http://eol.org/data_objects/24868232		0.706349	0.385321	0.854902	254.286	39	85	10.6349	193			http://eol.org/schema/terms/purplish-blue
Sisyrinchium angustifolium	Iridaceae	Strict Blue-eyed Grass	28.5661	-80.9942	6		Orlando Wetlands Park, Orange County, FL		native	139	125	231	http://eol.org/data_objects/24910536		0.688679	0.458874	0.905882	247.925	46	91	8.86792	195	Y		http://eol.org/schema/terms/purplish-blue
Veronica persica	Plantaginaceae	Birdeye Speedwell	40.7385	-80.6419	291		Lock 30 Woodlands, OH		native	153	138	208	http://eol.org/data_objects/24731742		0.702381	0.336538	0.815686	252.857	34	82	10.2381	137			http://eol.org/schema/terms/purplish-blue
Viola labradorica	Violaceae	American Dog Violet	40.7261	-80.6136	265		Beaver Creek State Park, OH		native	203	208	234	http://eol.org/data_objects/24839443		0.639785	0.132479	0.917647	230.323	13	92	3.97849	135			http://eol.org/schema/terms/greenish-blue
Viola labradorica	Violaceae	American Dog Violet	40.7261	-80.6136	265		Beaver Creek State Park, OH		native	187	176	219	http://eol.org/data_objects/24839444		0.709302	0.196347	0.858824	255.349	20	86	10.9302	136			http://eol.org/schema/terms/purplish-blue
Polemonium reptans	Polemoniaceae	Greek Valerian	39.9575	-80.4663	279		Richhill, Pennsylvania		native	171	147	195	http://eol.org/data_objects/24624282		0.75	0.246154	0.764706	270	25	76	15	131			http://eol.org/schema/terms/purplish-blue
Collinsia verna	Plantaginaceae	Spring Blue Eyed Mary	39.9575	-80.4663	279		Richhill, Pennsylvania		native	157	173	241	http://eol.org/data_objects/24624268		0.634921	0.348548	0.945098	228.571	35	95	3.49206	130	Y		http://eol.org/schema/terms/greenish-blue
Collinsia verna	Plantaginaceae	Spring Blue Eyed Mary	39.9931	-80.4631	430		West Finley, PA		native	205	199	245	http://eol.org/data_objects/23307158		0.688406	0.187755	0.960784	247.826	19	96	8.84058	745	Y		http://eol.org/schema/terms/purplish-blue
Lupinus polyphyllus	Fabaceae	Marsh Lupine	43.3616	-80.3144	285		Cambridge, Ontario, Canada		native	87	84	162	http://eol.org/data_objects/25132604		0.673077	0.481481	0.635294	242.308	48	64	7.30769	931			http://eol.org/schema/terms/purplish-blue
Lupinus polyphyllus	Fabaceae	Marsh Lupine	43.3616	-80.3144	285		Cambridge, Ontario, Canada		native	102	76	148	http://eol.org/data_objects/25132603		0.726852	0.486486	0.580392	261.667	49	58	12.6852	932			http://eol.org/schema/terms/purplish-blue
Lupinus polyphyllus	Fabaceae	Marsh Lupine	43.3616	-80.3144	285		Cambridge, Ontario, Canada		native	83	62	120	http://eol.org/data_objects/25132605		0.727011	0.483333	0.470588	261.724	48	47	12.7011	930			http://eol.org/schema/terms/purplish-blue
Lupinus polyphyllus	Fabaceae	Marsh Lupine	43.3616	-80.3144	285		Cambridge, Ontario, Canada		native	108	76	148	http://eol.org/data_objects/25132607		0.740741	0.486486	0.580392	266.667	49	58	14.0741	929			http://eol.org/schema/terms/purplish-blue
Viola labradorica	Violaceae	American Dog Violet	40.9303	-80.2344	343		Hell's Hollow, Lawrence, US-PA		native	164	175	174	http://eol.org/data_objects/23361497		0.484848	0.0628571	0.686275	174.545	6	69	-11.5152	138			http://eol.org/schema/terms/greenish-blue
Sisyrinchium montanum	Iridaceae	Strict Blue-eyed-grass	42.1609	-80.1176	176		Presque Isle State Park		native	122	162	223	http://eol.org/data_objects/25522141		0.60066	0.452915	0.87451	216.238	45	87	0.0660066	853	Y		http://eol.org/schema/terms/greenish-blue
Conradina grandiflora	Lamiaceae	Largeflower False Rosemary	27.0245	-80.109	9		Jonathan Dickenson State Park, Florida		native	214	201	208	http://eol.org/data_objects/23874415		0.910256	0.0607477	0.839216	327.692	6	84	31.0256	188			http://eol.org/schema/terms/reddish-purple
Polemonium reptans	Polemoniaceae	Greek Valerian	41.0652	-80.0881	344		Slippery Rock, Pennsylvania		native	172	166	246	http://eol.org/data_objects/24234697		0.679167	0.325203	0.964706	244.5	33	96	7.91667	141			http://eol.org/schema/terms/purplish-blue
Conradina grandiflora	Lamiaceae	Largeflower False Rosemary	26.8798	-80.0534	2		Juno Beach, Florida		native	201	199	217	eol.org/data_objects/22443623		0.685185	0.0829493	0.85098	246.667	8	85	8.51852	186			http://eol.org/schema/terms/purplish-blue
Conradina grandiflora	Lamiaceae	Largeflower False Rosemary	26.8798	-80.0534	2		Juno Beach, Florida		native	202	183	229	http://eol.org/data_objects/22760007		0.735507	0.200873	0.898039	264.783	20	90	13.5507	187			http://eol.org/schema/terms/purplish-blue
Conradina grandiflora	Lamiaceae	Largeflower False Rosemary	26.8798	-80.0534	2		Juno Beach, Florida		native	202	187	219	http://eol.org/data_objects/22443581		0.744792	0.146119	0.858824	268.125	15	86	14.4792	185			http://eol.org/schema/terms/purplish-blue
Collinsia verna	Plantaginaceae	Spring Blue Eyed Mary	40.6004	-80.0075	295		North Park, Wexford, Pennsylvania		native	153	172	249	http://eol.org/data_objects/24625308		0.633681	0.385542	0.976471	228.125	39	98	3.36806	800	Y		http://eol.org/schema/terms/greenish-blue
Clematis viticaulis	Ranunculaceae	Millboro Leatherflower	38.1117	-79.6502	620		Bath County, Virginia		native	210	203	182	http://eol.org/data_objects/23559034	general	0.125	0.133333	0.823529	45	13	82	-47.5	600			http://purl.obolibrary.org/obo/PATO_0001944
Lobelia siphilitica	Campanulaceae	Great Blue Lobelia	40.1612	-79.2704	409		Rector, pa		native	190	155	248	http://eol.org/data_objects/22428352		0.729391	0.375	0.972549	262.581	38	97	12.9391	133	Y		http://eol.org/schema/terms/purplish-blue
Veronica persica	Plantaginaceae	Birdeye Speedwell	35.9869	-79.0616	141		Orange County, NC		native	167	175	245	http://eol.org/data_objects/23365577		0.649573	0.318367	0.960784	233.846	32	96	4.95726	19			http://eol.org/schema/terms/greenish-blue
Houstonia pusilla	Lamiaceae	Tiny Bluet	35.9009	-79.0338	96		Chapel Hill, NC		native	189	117	196	http://eol.org/data_objects/23718415		0.818565	0.403061	0.768627	294.684	40	77	21.8565	18	Y		http://eol.org/schema/terms/purplish-blue
Cynoglossum virginianum	Boraginaceae	Wild Comfrey	35.9009	-79.0338	96		Chapel Hill, North Carolina		native	156	165	197	http://eol.org/data_objects/13531862		0.630081	0.208122	0.772549	226.829	21	77	3.00813	17			http://eol.org/schema/terms/greenish-blue
Viola dactyloides	Violaceae	Trilobed Violet	35.8885	-79.0155	74		Mason Farm Biological Preserve, Chapel Hill, NC		native	112	83	184	http://eol.org/data_objects/24170092		0.714521	0.548913	0.721569	257.228	55	72	11.4521	354			http://eol.org/schema/terms/purplish-blue
Viola dactyloides	Violaceae	Trilobed Violet	35.8885	-79.0155	74		Mason Farm Biological Preserve, Chapel Hill, NC		native	142	98	205	http://eol.org/data_objects/24170093		0.735202	0.521951	0.803922	264.673	52	80	13.5202	355			http://eol.org/schema/terms/purplish-blue
Sisyrinchium angustifolium	Iridaceae	Strict Blue-eyed Grass	35.994	-78.8986	114		Durham, North Carolina, United States		native	108	115	185	http://eol.org/data_objects/24991652		0.651515	0.416216	0.72549	234.545	42	73	5.15152	359	Y		http://eol.org/schema/terms/greenish-blue
Ipomoea purpurea	Convolvulaceae	Common Morning Glory	38.5127	-78.8778	387		Virginia, Edon, Greenmount Church		introduced	21	4	25	http://eol.org/data_objects/22730989		0.801587	0.84	0.0980392	288.571	84	10	20.1587	637			http://eol.org/schema/terms/purplish-blue
Baptisia australis var. aberrans	Fabaceae	Blue Wild Indigo	36.0766	-78.864	97		3602 Snow Hill Rd, Durham, North Carolina		native	64	72	244	http://eol.org/data_objects/21949508		0.659259	0.737705	0.956863	237.333	74	96	5.92593	375	Y		http://eol.org/schema/terms/greenish-blue
Ipomoea purpurea	Convolvulaceae	Common Morning Glory	35.8859	-78.684	131		North Carolina, Raleigh, Stonehenge, Bembrige Drive		introduced	195	146	205	http://eol.org/data_objects/22856300		0.805085	0.287805	0.803922	289.831	29	80	20.5085	353			http://eol.org/schema/terms/purplish-blue
Ipomoea purpurea	Convolvulaceae	Common Morning Glory	35.8845	-78.675	117		North Carolina, Raleigh, Springmoor		introduced	159	62	141	http://eol.org/data_objects/22856391		0.864261	0.610063	0.623529	311.134	61	62	26.4261	350			http://eol.org/schema/terms/reddish-purple
Lobelia spicata	Campanulaceae	Palespike Lobelia	35.8845	-78.675	117		North Carolina, Raleigh, Springmoor		native	217	200	215	http://eol.org/data_objects/22943921		0.852941	0.078341	0.85098	307.059	8	85	25.2941	351			http://eol.org/schema/terms/reddish-purple
Lobelia spicata	Campanulaceae	Palespike Lobelia	35.8845	-78.675	117		North Carolina, Raleigh, Springmoor		native	209	183	204	http://eol.org/data_objects/22943922		0.865385	0.124402	0.819608	311.538	12	82	26.5385	352			http://eol.org/schema/terms/reddish-purple
Houstonia pusilla	Lamiaceae	Tiny Bluet	35.8845	-78.675	117		United States, North Carolina, Raleigh, Springmoor		native	194	173	200	http://eol.org/data_objects/22943782		0.796296	0.135	0.784314	286.667	14	78	19.6296	349	Y		http://eol.org/schema/terms/purplish-blue
Houstonia pusilla	Lamiaceae	Tiny Bluet	35.8845	-78.675	117		United States, North Carolina, Raleigh, Springmoor		native	237	216	218	http://eol.org/data_objects/22943780		0.984127	0.0886076	0.929412	354.286	9	93	38.4127	348	Y		http://eol.org/schema/terms/reddish-purple
Duranta erecta	Verbenaceae	Golden Dewdrop	25.048	-77.3554	8		Bahamas, New Providence			141	115	140	http://eol.org/data_objects/23393463		0.839744	0.184397	0.552941	302.308	18	55	23.9744	182			http://eol.org/schema/terms/reddish-purple
Sisyrinchium angustifolium	Iridaceae	Strict Blue-eyed Grass	38.5896	-77.2563	19		Leesylvania State Park, Woodbridge, VA		native	211	144	199	http://eol.org/data_objects/23360389		0.863184	0.317536	0.827451	310.746	32	83	26.3184	640	Y		http://eol.org/schema/terms/reddish-purple
Commelina erecta	Commelinaceae	Whitemouth Dayflower	38.9975	-77.2525	32		Maryland, Potomac River, Great Falls		native	131	178	245	http://eol.org/data_objects/22728810		0.597953	0.465306	0.960784	215.263	47	96	-0.204678	682			http://eol.org/schema/terms/greenish-blue
Verbena hastata	Verbenaceae	Blue Vervain	38.6447	-77.2348	2		Occoquan National Wildlife Refuge, Woodbridge, VA		native	224	153	250	http://eol.org/data_objects/23360392		0.78866	0.388	0.980392	283.918	39	98	18.866	645	Y		http://eol.org/schema/terms/purplish-blue
Lobelia spicata	Campanulaceae	Palespike Lobelia	38.6447	-77.2348	2		Occoquan National Wildlife Refuge, Woodbridge, VA		native	205	202	203	http://eol.org/data_objects/23356058		0.944444	0.0146341	0.803922	340	1	80	34.4444	644			http://eol.org/schema/terms/reddish-purple
Eryngium aquaticum	Apiaceae	Rattlesnakemaster	38.6447	-77.2348	2		Occoquan National Wildlife Refuge, Woodbridge		native	185	215	217	http://eol.org/data_objects/22943429		0.510417	0.147465	0.85098	183.75	15	85	-8.95833	643			http://eol.org/schema/terms/greenish-blue
Viola sororia	Violaceae	Hooded Blue Violet	38.718	-77.1366	34		Virginia, Woodlawn Estate		native	224	171	234	http://eol.org/data_objects/22730238		0.806878	0.269231	0.917647	290.476	27	92	20.6878	656	Y		http://eol.org/schema/terms/purplish-blue
Veronica persica	Plantaginaceae	Birdeye Speedwell	38.88	-77.1068	83		Arlington, VA		native	178	188	221	http://eol.org/data_objects/23569941		0.627907	0.19457	0.866667	226.047	19	87	2.7907	104			http://eol.org/schema/terms/greenish-blue
Ipomoea purpurea	Convolvulaceae	Common Morning Glory	38.9232	-77.0838	56		DC, Washington, Glover-Archbold Park		introduced	191	99	144	http://eol.org/data_objects/22728232		0.918478	0.481675	0.74902	330.652	48	75	31.8478	669			http://eol.org/schema/terms/reddish-purple
Ipomoea purpurea	Convolvulaceae	Common Morning Glory	38.952	-77.0739	113		DC, Washington, Nebraska Ave.		introduced	216	160	215	http://eol.org/data_objects/22856139		0.83631	0.259259	0.847059	301.071	26	85	23.631	673			http://eol.org/schema/terms/reddish-purple
Viola sororia	Violaceae	Hooded Blue Violet	38.9313	-77.0714	112		DC, Washington Cathedral, Spring Garden		native	125	157	160	http://eol.org/data_objects/22729010		0.514286	0.21875	0.627451	185.143	22	63	-8.57143	670	Y		http://eol.org/schema/terms/greenish-blue
Viola sororia	Violaceae	Hooded Blue Violet	38.9376	-77.0675	98		DC, Washington, 3425 Porter St.		native	205	183	228	http://eol.org/data_objects/22729424		0.748148	0.197368	0.894118	269.333	20	89	14.8148	671	Y		http://eol.org/schema/terms/purplish-blue
Viola sororia	Violaceae	Hooded Blue Violet	38.9172	-77.0586	16		District of Columbia, Rock Creek Park		native	164	134	179	http://eol.org/data_objects/22730295		0.777778	0.251397	0.701961	280	25	70	17.7778	668	Y		http://eol.org/schema/terms/purplish-blue
Viola sororia	Violaceae	Hooded Blue Violet	38.9429	-77.0546	72		DC, above Tilden St, Bridge,.Rock Creek Park		native	202	175	224	http://eol.org/data_objects/22729450		0.758503	0.21875	0.878431	273.061	22	88	15.8503	672	Y		http://eol.org/schema/terms/purplish-blue
Conoclinium coelestinum	Asteraceae	Blue Mistflower	38.9931	-77.0398	91		Tamarack Sts. NW., District of Columbia		native	162	129	206	http://eol.org/data_objects/18519166		0.738095	0.373786	0.807843	265.714	37	81	13.8095	681	Y		http://eol.org/schema/terms/purplish-blue
Veronica persica	Plantaginaceae	Birdeye Speedwell	42.5705	-76.5984	140		2–198 Sweazey Rd, Lansing, New York		native	168	178	233	http://eol.org/data_objects/24234486		0.641026	0.27897	0.913725	230.769	28	91	4.10256	890			http://eol.org/schema/terms/greenish-blue
Sisyrinchium angustifolium	Iridaceae	Strict Blue-eyed Grass	38.4443	-76.1063	1		Blackwater National Wildlife Refuge, MD		native	194	209	237	http://eol.org/data_objects/24623826		0.608527	0.181435	0.929412	219.07	18	93	0.852713	92	Y		http://eol.org/schema/terms/greenish-blue
Viola labradorica	Violaceae	American Dog Violet	39.7856	-75.65	75		Mt. Cuba Center, Barley Mill Road outside of Hockessin, Delaware, near Wilmington, Delaware		native	164	133	229	http://eol.org/data_objects/5906939		0.720486	0.419214	0.898039	259.375	42	90	12.0486	736			http://eol.org/schema/terms/purplish-blue
Viola labradorica	Violaceae	American Dog Violet	39.7856	-75.65	75		Mt. Cuba Center, Barley Mill Road outside of Hockessin, Delaware, near Wilmington, Delaware		native	152	105	200	http://eol.org/data_objects/5906937		0.749123	0.475	0.784314	269.684	48	78	14.9123	735			http://eol.org/schema/terms/purplish-blue
Viola labradorica	Violaceae	American Dog Violet	44.6437	-73.3155	31		South Hero, VT		native	241	152	229	http://eol.org/data_objects/24799086		0.855805	0.369295	0.945098	308.09	37	95	25.5805	165			http://eol.org/schema/terms/reddish-purple
Viola labradorica	Violaceae	American Dog Violet	44.6437	-73.3155	31		South Hero, VT		native	188	96	172	http://eol.org/data_objects/24799084		0.862319	0.489362	0.737255	310.435	49	74	26.2319	163			http://eol.org/schema/terms/reddish-purple
Viola labradorica	Violaceae	American Dog Violet	44.6437	-73.3155	31		South Hero, VT		native	198	130	178	http://eol.org/data_objects/24799085		0.882353	0.343434	0.776471	317.647	34	78	28.2353	164			http://eol.org/schema/terms/reddish-purple
Verbena hastata	Verbenaceae	Blue Vervain	43.447	-72.5343	218		80 Grasshopper Ln, Reading, Vermont		native	225	171	239	http://eol.org/data_objects/25204837		0.79902	0.284519	0.937255	287.647	28	94	19.902	160	Y		http://eol.org/schema/terms/purplish-blue
Verbena hastata	Verbenaceae	Blue Vervain	43.8167	-72.528	235		Kent's Ledge Trail, South Royalton, Vermont,		native	151	116	238	http://eol.org/data_objects/25399762		0.714481	0.512605	0.933333	257.213	51	93	11.4481	162	Y		http://eol.org/schema/terms/purplish-blue
Verbena hastata	Verbenaceae	Blue Vervain	43.6796	-72.3827	190		131–199 Runnals Rd, White River Junction, Vermont		native	180	107	234	http://eol.org/data_objects/25398665		0.762467	0.542735	0.917647	274.488	54	92	16.2467	161	Y		http://eol.org/schema/terms/purplish-blue
Polemonium reptans	Polemoniaceae	Greek Valerian	42.3668	-71.3031	57		Massachusetts, Weston		native	150	136	178	http://eol.org/data_objects/23389421		0.722222	0.235955	0.698039	260	24	70	12.2222	881			http://eol.org/schema/terms/purplish-blue
Lupinus polyphyllus	Fabaceae	Marsh Lupine	44.6648	-69.2417	152		Troy, Maine		native	90	83	151	http://eol.org/data_objects/24945719		0.683824	0.450331	0.592157	246.176	45	59	8.38235	940			http://eol.org/schema/terms/purplish-blue
Commelina erecta	Commelinaceae	Whitemouth Dayflower	-14.5631	-68.8386	1079		Parque Nacional Madidi, rio Mojos, entre Mojos y Charopampa, La Paz, Bolivia	No		113	124	210	http://eol.org/data_objects/22041557		0.647766	0.461905	0.823529	233.196	46	82	4.77663	5			http://eol.org/schema/terms/greenish-blue
Duranta erecta	Verbenaceae	Golden Dewdrop	-15.7406	-47.8564	1040	x	Lago Norte, Distrito Federal, Brazil	No		203	199	221	http://eol.org/data_objects/24903129		0.69697	0.0995475	0.866667	250.909	10	87	9.69697	993			http://eol.org/schema/terms/purplish-blue
Datura stramonium var. chalybaea	Solanaceae	Jimsonweed	51.1667	-1.66667	102		Vice County: North Hampshire, VC12, England	No		101	94	117	http://eol.org/data_objects/22897509		0.717391	0.196581	0.458824	258.261	20	46	11.7391	959			http://eol.org/schema/terms/purplish-blue
Myosotis discolor	Boraginaceae	Yellow-and-blue Forget-me-not	51.3333	-1.33333	141		Vice County: Berks, VC22, England	No		228	233	238	http://eol.org/data_objects/22833426		0.583333	0.0420168	0.933333	210	4	93	-1.66667	962	Y		http://eol.org/schema/terms/greenish-blue
Polygala vulgaris	Polygalaceae	Common Milkwort	51	-0.833333	45		North Wiltshire, VC7, England	No		133	105	164	http://eol.org/data_objects/22811857		0.745763	0.359756	0.643137	268.475	36	64	14.5763	958			http://eol.org/schema/terms/purplish-blue
Polygala vulgaris	Polygalaceae	Common Milkwort	54	-0.666667	156		South-east Yorkshire, VC61, England	No		218	216	209	http://eol.org/data_objects/22811554		0.12963	0.0412844	0.854902	46.6667	4	85	-47.037	969			http://purl.obolibrary.org/obo/PATO_0001944
Myosotis discolor	Boraginaceae	Yellow-and-blue Forget-me-not	51.3333	-0.333333	63		ice County: Surrey, VC17, England	No		204	202	180	http://eol.org/data_objects/22811625		0.152778	0.117647	0.8	55	12	80	-44.7222	961	Y		http://purl.obolibrary.org/obo/PATO_0001944
Polygala vulgaris	Polygalaceae	Common Milkwort	50.8333	-0.166667	31		East Sussex, VC14, England	No		235	240	220	http://eol.org/data_objects/22811420		0.208333	0.0833333	0.941176	75	8	94	-39.1667	957			http://purl.obolibrary.org/obo/PATO_0001941
Polygala vulgaris	Polygalaceae	Common Milkwort	56.934	9.20313	17		Lendrup S Løgstør, Jylland, Danmark	No		163	139	174	http://eol.org/data_objects/19180171		0.780952	0.201149	0.682353	281.143	20	68	18.0952	984			http://eol.org/schema/terms/purplish-blue
Ageratum houstonianum	Asteraceae	Floss Flower	56.6604	9.78181	50		Hobro, Jylland, Danmark	No	non-native	175	125	223	http://eol.org/data_objects/19143732		0.751701	0.439462	0.87451	270.612	44	87	15.1701	976			http://eol.org/schema/terms/purplish-blue
Limosella aquatica	Scrophulariaceae	Northern Mudwort	56.8881	9.83005	38		Voldsted gadekær Ø. f. Støvring, Danmark	No		218	205	200	http://eol.org/data_objects/19170348		0.0462963	0.0825688	0.854902	16.6667	8	85	-55.3704	980			http://eol.org/schema/terms/orangish-red
Limosella aquatica	Scrophulariaceae	Northern Mudwort	56.8881	9.83005	38		Voldsted gadekær Ø. f. Støvring, Danmark	No		241	231	215	http://eol.org/data_objects/19170346		0.102564	0.107884	0.945098	36.9231	11	95	-49.7436	982			http://purl.obolibrary.org/obo/PATO_0001944
Limosella aquatica	Scrophulariaceae	Northern Mudwort	56.8881	9.83005	38		Voldsted gadekær Ø. f. Støvring, Danmark	No		200	182	185	http://eol.org/data_objects/19170347		0.972222	0.09	0.784314	350	9	78	37.2222	981			http://eol.org/schema/terms/reddish-purple
Limosella aquatica	Scrophulariaceae	Northern Mudwort	56.8881	9.83005	38		Voldsted gadekær Ø. f. Støvring, Danmark	No		218	197	198	http://eol.org/data_objects/19170343		0.992063	0.0963303	0.854902	357.143	10	85	39.2063	983			http://eol.org/schema/terms/reddish-purple
Lactuca tatarica	Asteraceae	Chicory Lettuce	55.2708	9.90196	15		Sønderby klint, Assens, Fyn, Danmark	No		150	139	218	http://eol.org/data_objects/19173376		0.689873	0.362385	0.854902	248.354	36	85	8.98734	970			http://eol.org/schema/terms/purplish-blue
Lactuca tatarica	Asteraceae	Chicory Lettuce	55.2708	9.90196	15		Sønderby klint, Assens, Fyn, Danmark	No		173	150	237	http://eol.org/data_objects/19173378		0.710728	0.367089	0.929412	255.862	37	93	11.0728	972			http://eol.org/schema/terms/purplish-blue
Lactuca tatarica	Asteraceae	Chicory Lettuce	55.2708	9.90196	15		Sønderby klint, Assens, Fyn, Danmark	No		196	168	219	http://eol.org/data_objects/19173377		0.75817	0.232877	0.858824	272.941	23	86	15.817	971			http://eol.org/schema/terms/purplish-blue
Myosotis discolor	Boraginaceae	Yellow-and-blue Forget-me-not	56.6653	9.94167	0		Kielstrup Sø	No		178	178	156	http://eol.org/data_objects/19173703		0.166667	0.123596	0.698039	60	12	70	-43.3333	977	Y		http://purl.obolibrary.org/obo/PATO_0000324
Myosotis discolor	Boraginaceae	Yellow-and-blue Forget-me-not	56.6724	9.99193	46		Hjerritsdal ved Mariager Fjord, Danmark	No		134	136	126	http://eol.org/data_objects/19173710		0.2	0.0735294	0.533333	72	7	53	-40	978	Y		http://purl.obolibrary.org/obo/PATO_0001941
Polygala vulgaris	Polygalaceae	Common Milkwort	55.7649	10.6202	3		Lushage	No		190	96	195	http://eol.org/data_objects/19180172		0.824916	0.507692	0.764706	296.97	51	76	22.4916	973			http://eol.org/schema/terms/purplish-blue
Polygala vulgaris	Polygalaceae	Common Milkwort	56.3169	10.8083	13		Glatved, Djursland, Danmark	No		79	84	139	http://eol.org/data_objects/19180169		0.652778	0.431655	0.545098	235	43	55	5.27778	975			http://eol.org/schema/terms/greenish-blue
Limosella aquatica	Scrophulariaceae	Northern Mudwort	52.87	12.0193	24		banks of the Elbe River, North-eastern Lower Saxony, Germany	No		186	179	174	http://eol.org/data_objects/13555527		0.0694444	0.0645161	0.729412	25	6	73	-53.0556	968			http://eol.org/schema/terms/orangish-red
Limosella aquatica	Scrophulariaceae	Northern Mudwort	52.87	12.0193	24		banks of the Elbe River, North-eastern Lower Saxony, Germany	No		215	227	201	http://eol.org/data_objects/21507307		0.24359	0.114537	0.890196	87.6923	11	89	-35.641	967			http://purl.obolibrary.org/obo/PATO_0001941
Limosella aquatica	Scrophulariaceae	Northern Mudwort	52.87	12.0193	24		banks of the Elbe River, North-eastern Lower Saxony, Germany	No		180	179	206	http://eol.org/data_objects/22394257	very approximate	0.67284	0.131068	0.807843	242.222	13	81	7.28395	966			http://eol.org/schema/terms/purplish-blue
Polygala vulgaris	Polygalaceae	Common Milkwort	50.7819	15.2315	589		Czech Republic, Důl Josef	No		154	142	245	http://eol.org/data_objects/2448246		0.686084	0.420408	0.960784	246.99	42	96	8.60841	956			http://eol.org/schema/terms/purplish-blue
Polemonium boreale	Polemoniaceae	Northern Jacob's-ladder	78.2411	15.5953	1		Spitsbergen - vestlige del, N f. Adventfjorden	No		110	122	161	http://eol.org/data_objects/19180043		0.627451	0.31677	0.631373	225.882	32	63	2.7451	992			http://eol.org/schema/terms/greenish-blue
Polygala vulgaris	Polygalaceae	Common Milkwort	48.9167	20.4167	740		Slovakia, Slovenský ráj - Velký soko	No		183	167	234	http://eol.org/data_objects/2448244		0.706468	0.286325	0.917647	254.328	29	92	10.6468	955			http://eol.org/schema/terms/purplish-blue
Polemonium boreale	Polemoniaceae	Northern Jacob's-ladder	77.875	20.9752	0		Svalbard	No		139	135	201	http://eol.org/data_objects/12492155		0.676768	0.328358	0.788235	243.636	33	79	7.67677	991			http://eol.org/schema/terms/purplish-blue
Limosella aquatica	Scrophulariaceae	Northern Mudwort	64.9389	24.7679	1		Iomatala, Hailuoto, Finland	No		216	220	223	http://eol.org/data_objects/19170344		0.571429	0.0313901	0.87451	205.714	3	87	-2.85714	989			http://eol.org/schema/terms/greenish-blue
Polemonium boreale	Polemoniaceae	Northern Jacob's-ladder	70.0832	28.983	1		Norge, Varangerfjord, Bugöynes	No		121	137	184	http://eol.org/data_objects/19180045		0.624339	0.342391	0.721569	224.762	34	72	2.43386	990			http://eol.org/schema/terms/greenish-blue
Polemonium boreale	Polemoniaceae	Northern Jacob's-ladder	69.9728	29.6346	4		Bygoynes, Norway	No		206	211	237	http://eol.org/data_objects/12492159		0.639785	0.130802	0.929412	230.323	13	93	3.97849	174			http://eol.org/schema/terms/greenish-blue
Polemonium boreale	Polemoniaceae	Northern Jacob's-ladder	69.9725	29.6349	7		Bygoynes, Norway	No		157	149	204	http://eol.org/data_objects/12492161		0.690909	0.269608	0.8	248.727	27	80	9.09091	173			http://eol.org/schema/terms/purplish-blue
Polemonium boreale	Polemoniaceae	Northern Jacob's-ladder	69.9725	29.6349	7		Bygoynes, Norway	No		137	144	194	http://eol.org/data_objects/12492160		0.646199	0.293814	0.760784	232.632	29	76	4.61988	172			http://eol.org/schema/terms/greenish-blue
Polemonium boreale	Polemoniaceae	Northern Jacob's-ladder	69.9724	29.6352	8		Bygoynes, Norway	No		150	148	171	http://eol.org/data_objects/12492158		0.681159	0.134503	0.670588	245.217	13	67	8.11594	171			http://eol.org/schema/terms/purplish-blue
Ageratum houstonianum	Asteraceae	Floss Flower	-20.4133	32.703	1135		In open disturbed area By road from Swynnerton Memorial to main road, Chirinda Forest	No	introduced	151	125	155	http://eol.org/data_objects/19250391		0.811111	0.193548	0.607843	292	19	61	21.1111	1			http://eol.org/schema/terms/purplish-blue
Ageratum houstonianum	Asteraceae	Floss Flower	-19.1117	32.784	1496	x	Roadside verge, Vumba Rd, nr Mountain Lodge	No	introduced	208	150	240	http://eol.org/data_objects/19250389		0.774074	0.375	0.941176	278.667	38	94	17.4074	994			http://eol.org/schema/terms/purplish-blue
Haumaniastrum dissitifolium	Lamiaceae		-18.4412	34.0489	1709		Plateau below Nhandore peak, Mt Gorongosa	No	introduced	164	165	193	http://eol.org/data_objects/19246738		0.66092	0.150259	0.756863	237.931	15	76	6.09195	2			http://eol.org/schema/terms/greenish-blue
Haumaniastrum dissitifolium	Lamiaceae		-18.4412	34.0489	1709		Plateau below Nhandore peak, Mt Gorongosa	No	introduced	118	114	149	http://eol.org/data_objects/19246740		0.685714	0.234899	0.584314	246.857	23	58	8.57143	4			http://eol.org/schema/terms/purplish-blue
Haumaniastrum dissitifolium	Lamiaceae		-18.4412	34.0489	1709		Plateau below Nhandore peak, Mt Gorongosa	No	introduced	110	99	140	http://eol.org/data_objects/19246739		0.711382	0.292857	0.54902	256.098	29	55	11.1382	3			http://eol.org/schema/terms/purplish-blue
Ageratum houstonianum	Asteraceae	Floss Flower	25.0164	121.537	16		National Taiwan University, Taipei City, Taiwan	No	introduced	168	145	200	http://eol.org/data_objects/13534885		0.736364	0.275	0.784314	265.091	28	78	13.6364	181			http://eol.org/schema/terms/purplish-blue
Ageratum houstonianum	Asteraceae	Floss Flower	24.1667	121.55	758		Tienhsiang, Taroko Gorge, Taiwan	No	cultivated	203	197	216	http://eol.org/data_objects/13533888		0.719298	0.087963	0.847059	258.947	9	85	11.9298	180			http://eol.org/schema/terms/purplish-blue
Camassia quamash	Asparagaceae	Small Camas	45.8399N	122.7511W	3.048		Oaks to Wetlands Trail, west shore of Boot Lake, Carty Unit, Ridgefield National Wildlife Refuge		native	106	92	147	http://eol.org/data_objects/5900752		0.709091	0.37415	0.576471	255.273	37	58	10.9091	1026			http://eol.org/schema/terms/purplish-blue
Symphyotrichum oblongifolium	Asteraceae	Aromatic Aster	NA	NA	NA		Glencoe, Illinois; Chicago Botanic Garden; SW Savannah Garden, bed 1003		cultivated	218	190	251	http://eol.org/data_objects/11387583		0.743169	0.243028	0.984314	267.541	24	98	14.3169	1157			http://eol.org/schema/terms/purplish-blue
Symphyotrichum oblongifolium	Asteraceae	Aromatic Aster	NA	NA	NA		Glencoe, Illinois; Chicago Botanic Garden; SW Savannah Garden, bed 1003		cultivated	174	132	197	http://eol.org/data_objects/11387581		0.774359	0.329949	0.772549	278.769	33	77	17.4359	1156			http://eol.org/schema/terms/purplish-blue
Salvia azurea	Lamiaceae	Azure Blue Sage	NA	NA	NA		Osaka Prefectural Flower Garden,Osaka,Japan	No	cultivated	149	183	252	http://eol.org/data_objects/5857526		0.61165	0.40873	0.988235	220.194	41	99	1.16505	1145	Y		http://eol.org/schema/terms/greenish-blue
Salvia azurea	Lamiaceae	Azure Blue Sage	NA	NA	NA		Osaka Prefectural Flower Garden,Osaka,Japan	No	cultivated	100	123	211	http://eol.org/data_objects/5857525		0.632132	0.526066	0.827451	227.568	53	83	3.21321	1144	Y		http://eol.org/schema/terms/greenish-blue
Agastache foeniculum	Lamiaceae	Blue Giant Hyssop	NA	NA	NA		Annie's Annulas and Perennials nursery, Richmond, California, U.S.A.		cultivated	117	71	105	http://eol.org/data_objects/21587556		0.876812	0.393162	0.458824	315.652	39	46	27.6812	1027	Y		http://eol.org/schema/terms/reddish-purple
Agastache foeniculum	Lamiaceae	Blue Giant Hyssop	NA	NA	NA		Jardin de Plantes du Poitiers, France	No	cultivated	169	168	215	http://eol.org/data_objects/13517380		0.670213	0.218605	0.843137	241.277	22	84	7.02128	1028	Y		http://eol.org/schema/terms/purplish-blue
Baptisia australis var. minor	Fabaceae	Blue Wild Indigo	NA	NA	NA		National Botanic Garden, Washington, DC		cultivated	133	117	181	http://eol.org/data_objects/17276214		0.708333	0.353591	0.709804	255	35	71	10.8333	1030	Y		http://eol.org/schema/terms/purplish-blue
Lupinus obtusilobus	Fabaceae	Blunt-lobe Lupine	NA	NA	NA		JFNew Nursery. Lake. Indiana		cultivated	139	122	182	http://eol.org/data_objects/2138993		0.713889	0.32967	0.713725	257	33	71	11.3889	1113			http://eol.org/schema/terms/purplish-blue
Lupinus obtusilobus	Fabaceae	Blunt-lobe Lupine	NA	NA	NA		JFNew Nursery. Lake. Indiana		cultivated	132	104	160	http://eol.org/data_objects/2138992		0.75	0.35	0.627451	270	35	63	15	1112			http://eol.org/schema/terms/purplish-blue
Phacelia bolanderi	Plantaginaceae	Bolander's Phacelia	NA	NA	NA		California, Berkeley, Tilden Botanical Garden		cultivated	133	143	161	http://eol.org/data_objects/22731738		0.607143	0.173913	0.631373	218.571	17	63	0.714286	1128			http://eol.org/schema/terms/greenish-blue
Ageratum houstonianum	Asteraceae	Floss Flower	NA	NA	NA		in clifftop garden,UK	No	cultivated	153	129	218	http://eol.org/data_objects/22889128	2 specimens in picture	0.71161	0.408257	0.854902	256.18	41	85	11.161	1029			http://eol.org/schema/terms/purplish-blue
Symphyotrichum cordifolium	Asteraceae	Lowrie's Blue Wood Aster	NA	NA	NA		Glencoe, Illinois; Chicago Botanic Garden; Woods, General area, bed 1000		cultivated	232	222	255	http://eol.org/data_objects/11387606		0.717172	0.129412	1	258.182	13	100	11.7172	1152	Y		http://eol.org/schema/terms/purplish-blue
Symphyotrichum cordifolium	Asteraceae	Lowrie's Blue Wood Aster	NA	NA	NA		Greenbelt Native Plant Center, Staten Island, NY		cultivated	169	177	204	http://eol.org/data_objects/24860820		0.628571	0.171569	0.8	226.286	17	80	2.85714	1153	Y		http://eol.org/schema/terms/greenish-blue
Salvia munzii	Lamiaceae	Munz's Sage	NA	NA	NA		Rancho Santa Ana Botanic Garden, Claremont CA		cultivated	158	160	206	http://eol.org/data_objects/13166550		0.659722	0.23301	0.807843	237.5	23	81	5.97222	1146			http://eol.org/schema/terms/greenish-blue
Salvia munzii	Lamiaceae	Munz's Sage	NA	NA	NA		University of California Botanical Garden, Berkeley, California		cultivated	163	149	218	http://eol.org/data_objects/19748799		0.700483	0.316514	0.854902	252.174	32	85	10.0483	1147			http://eol.org/schema/terms/purplish-blue
Salvia munzii	Lamiaceae	Munz's Sage	NA	NA	NA		University of California Botanical Garden, Berkeley, California		cultivated	180	163	233	http://eol.org/data_objects/19855994		0.707143	0.300429	0.913725	254.571	30	91	10.7143	1148			http://eol.org/schema/terms/purplish-blue
Salvia munzii	Lamiaceae	Munz's Sage	NA	NA	NA		University of California Botanical Garden, Berkeley, California		cultivated	134	114	173	http://eol.org/data_objects/19855995		0.723164	0.34104	0.678431	260.339	34	68	12.3164	1149			http://eol.org/schema/terms/purplish-blue
Polemonium boreale	Polemoniaceae	Northern Jacob's-ladder	NA	NA	NA		Den geografiske have, Kolding, Danmark	No	cultivated	120	117	206	http://eol.org/data_objects/19180037		0.672285	0.432039	0.807843	242.022	43	81	7.22846	1140			http://eol.org/schema/terms/purplish-blue
Polemonium boreale	Polemoniaceae	Northern Jacob's-ladder	NA	NA	NA		Den geografiske have, Kolding, Danmark	No	cultivated	152	144	217	http://eol.org/data_objects/19180039		0.684932	0.336406	0.85098	246.575	34	85	8.49315	1141			http://eol.org/schema/terms/purplish-blue
Camassia angusta	Asparagaceae	Prairie Camas	NA	NA	NA		wildflower garden in Urbana, Illinois		cultivated	120	116	151	http://eol.org/data_objects/24107156		0.685714	0.231788	0.592157	246.857	23	59	8.57143	1031			http://eol.org/schema/terms/purplish-blue
Symphyotrichum praealtum	Asteraceae	Willowleaf Aster	NA	NA	NA		Glencoe, Illinois; Chicago Botanic Garden; SW Savannah Garden, bed 1003		cultivated	176	148	206	http://eol.org/data_objects/11387594		0.747126	0.281553	0.807843	268.966	28	81	14.7126	1161			http://eol.org/schema/terms/purplish-blue
Symphyotrichum praealtum	Asteraceae	Willowleaf Aster	NA	NA	NA		Glencoe, Illinois; Chicago Botanic Garden; SW Savannah Garden, bed 1003		cultivated	165	139	178	http://eol.org/data_objects/11387592		0.777778	0.219101	0.698039	280	22	70	17.7778	1162			http://eol.org/schema/terms/purplish-blue
Duranta erecta	Verbenaceae	Golden Dewdrop	NA	NA	NA		Hakahau town, Ua Pou, Marquesas Islands, French Polynesia, Pacific Islands	No	introduced	229	226	242	http://eol.org/data_objects/20832496		0.697917	0.0661157	0.94902	251.25	7	95	9.79167	1064			http://eol.org/schema/terms/purplish-blue
Duranta erecta	Verbenaceae	Golden Dewdrop	NA	NA	NA		Hyderabad, India	No	introduced	188	158	220	http://eol.org/data_objects/17749255		0.747312	0.281818	0.862745	269.032	28	86	14.7312	1065			http://eol.org/schema/terms/purplish-blue
Duranta erecta	Verbenaceae	Golden Dewdrop	NA	NA	NA		USA, Hawaii, Kauai	No	introduced	217	209	208	http://eol.org/data_objects/23393490	too vague	0.0185185	0.0414747	0.85098	6.66667	4	85	-58.1481	1066			http://eol.org/schema/terms/orangish-red
Lippia alba	Verbenaceae	Bushy Matgrass	NA	NA	NA		Barbados, West Indies	No		216	186	206	http://eol.org/data_objects/25075156		0.888889	0.138889	0.847059	320	14	85	28.8889	1099			http://eol.org/schema/terms/reddish-purple
Lactuca tatarica	Asteraceae	Chicory Lettuce	NA	NA	NA		Eksta-kysten, Gotland, Sverige	No		141	100	224	http://eol.org/data_objects/19173374	unable to locate	0.721774	0.553571	0.878431	259.839	55	88	12.1774	1088			http://eol.org/schema/terms/purplish-blue
Lactuca tatarica	Asteraceae	Chicory Lettuce	NA	NA	NA		Eksta-kysten, Gotland, Sverige	No		142	101	218	http://eol.org/data_objects/19173375	unable to locate	0.725071	0.536697	0.854902	261.026	54	85	12.5071	1089			http://eol.org/schema/terms/purplish-blue
Lactuca tatarica	Asteraceae	Chicory Lettuce	NA	NA	NA		Eksta-kysten, Gotland, Sverige	No		183	147	218	http://eol.org/data_objects/19173381	unable to locate	0.751174	0.325688	0.854902	270.423	33	85	15.1174	1090			http://eol.org/schema/terms/purplish-blue
Duranta erecta	Verbenaceae	Golden Dewdrop	NA	NA	NA		French Guyana	No		178	127	222	http://eol.org/data_objects/17749254	too vague	0.75614	0.427928	0.870588	272.211	43	87	15.614	1063			http://eol.org/schema/terms/purplish-blue
Delphinium decorum	Ranunculaceae	Yellow-tinged Larkspur	NA	NA	NA		Botanisk Have Århus	No		36	22	120	http://eol.org/data_objects/19157842		0.690476	0.816667	0.470588	248.571	82	47	9.04762	1061			http://eol.org/schema/terms/purplish-blue
Iris virginica	Iridaceae	Blue Flag Iris					Louisiana		native	180	162	158	http://eol.org/data_objects/23357090	too vague	0.030303	0.122222	0.705882	10.9091	12	71	-56.9697	1084	Y		http://eol.org/schema/terms/orangish-red
Iris virginica	Iridaceae	Blue Flag Iris					Louisiana		native	105	87	153	http://eol.org/data_objects/23357091	too vague	0.712121	0.431373	0.6	256.364	43	60	11.2121	1085	Y		http://eol.org/schema/terms/purplish-blue
Iris virginica	Iridaceae	Blue Flag Iris					Louisiana		native	152	128	184	http://eol.org/data_objects/23357092	too vague	0.738095	0.304348	0.721569	265.714	30	72	13.8095	1086	Y		http://eol.org/schema/terms/purplish-blue
Baptisia australis	Fabaceae	Blue Wild Indigo					Texas		native	139	137	197	http://eol.org/data_objects/1378643	too vague	0.672222	0.304569	0.772549	242	30	77	7.22222	1038	Y		http://eol.org/schema/terms/purplish-blue
Collinsia parviflora	Plantaginaceae	Blue-eyed Mary					Bureau of Land Management Jarbidge Resource Area		native	183	187	222	http://eol.org/data_objects/1381428		0.649573	0.175676	0.870588	233.846	18	87	4.95726	1058	Y		http://eol.org/schema/terms/greenish-blue
Collinsia parviflora	Plantaginaceae	Blue-eyed Mary			2164.08		Cedars, Airplane Meadow, , Placer County, California		native	114	126	237	http://eol.org/data_objects/12511619	unable to locate	0.650407	0.518987	0.929412	234.146	52	93	5.04065	1059	Y		http://eol.org/schema/terms/greenish-blue
Collinsia parviflora	Plantaginaceae	Blue-eyed Mary					Sonora Pass Road, California		native	126	112	115	http://eol.org/data_objects/12511618	too vague	0.964286	0.111111	0.494118	347.143	11	49	36.4286	1060	Y		http://eol.org/schema/terms/reddish-purple
Collinsia parviflora	Plantaginaceae	Blue-eyed Mary			2164		Sugar Loaf, San Bernardino County, California		native	159	163	185	http://eol.org/data_objects/13151427		0.641026	0.140541	0.72549	230.769	14	73	4.10256	299	Y		http://eol.org/schema/terms/greenish-blue
Lupinus obtusilobus	Fabaceae	Blunt-lobe Lupine					northern Maine		native	84	69	140	http://eol.org/data_objects/5917172	too vague	0.701878	0.507143	0.54902	252.676	51	55	10.1878	1114			http://eol.org/schema/terms/purplish-blue
Phacelia bolanderi	Plantaginaceae	Bolander's Phacelia					Hwy 1, roadside, Mendocino County, California		native	188	191	217	http://eol.org/data_objects/20835710	too vague	0.649425	0.133641	0.85098	233.793	13	85	4.94253	1130			http://eol.org/schema/terms/greenish-blue
Phacelia bolanderi	Plantaginaceae	Bolander's Phacelia					Hwy 1, roadside, Mendocino County, California		native	109	106	127	http://eol.org/data_objects/20835711	too vague	0.690476	0.165354	0.498039	248.571	17	50	9.04762	1131			http://eol.org/schema/terms/purplish-blue
Phacelia bolanderi	Plantaginaceae	Bolander's Phacelia					Hwy 1, roadside, Mendocino County, California		native	189	142	104	http://eol.org/data_objects/20835709	too vague	0.0745098	0.449735	0.741176	26.8235	45	74	-52.549	1129			http://eol.org/schema/terms/orangish-red
Ceanothus integerrimus	Rhamnaceae	California Lilac			1828.8		Cedars, off porch at house, Placer County, California		native	213	235	68	http://eol.org/data_objects/12510429	unable to locate	0.188623	0.710638	0.921569	67.9042	71	92	-41.1377	1057			http://purl.obolibrary.org/obo/PATO_0001941
Campanula exigua	Campanulaceae	Chaparral Bellflower					California		native	207	208	231	http://eol.org/data_objects/13149382	not exact enough	0.659722	0.103896	0.905882	237.5	10	91	5.97222	1048			http://eol.org/schema/terms/greenish-blue
Campanula exigua	Campanulaceae	Chaparral Bellflower					California		native	225	219	232	http://eol.org/data_objects/13149383	not exact enough	0.74359	0.0560345	0.909804	267.692	6	91	14.359	1049			http://eol.org/schema/terms/purplish-blue
Ipomoea purpurea	Convolvulaceae	Common Morning Glory					los jardines del Centro de Investigaciones Tropicales, en el municipio de Xalapa	No	native	111	21	132	http://eol.org/data_objects/24916463	unable to locate	0.801802	0.840909	0.517647	288.649	84	52	20.1802	1083			http://eol.org/schema/terms/purplish-blue
Brodiaea coronaria ssp. rosea	Asparagaceae	Crown Brodiaea					United States, California, Plumas County, Indian Valley, Stanton Creek, near waters edge		native	160	150	26	http://eol.org/data_objects/23559907	landscape photo; unable to locate	0.154229	0.8375	0.627451	55.5224	84	63	-44.5771	1043			http://purl.obolibrary.org/obo/PATO_0001944
Pholistoma auritum var. auritum	Boraginaceae	Desert Fiesta-flower					Rocky roadcut along River Road, Tuolumne County, California		native	153	133	222	http://eol.org/data_objects/13267230	too vague	0.70412	0.400901	0.870588	253.483	40	87	10.412	1136			http://eol.org/schema/terms/purplish-blue
Phacelia campanularia	Plantaginaceae	Desert Scorpionweed					Rt. S-22, San Diego County, California		native	107	96	127	http://eol.org/data_objects/12522420	too vague	0.725806	0.244094	0.498039	261.29	24	50	12.5806	1135			http://eol.org/schema/terms/purplish-blue
Navarretia pubescens	Polemoniaceae	Downy Navarretia					North America, United States, California		native	65	40	91	http://eol.org/data_objects/23393633	too vague	0.748366	0.56044	0.356863	269.412	56	36	14.8366	1123			http://eol.org/schema/terms/purplish-blue
Langloisia setosissima	Polemoniaceae	Great Basin Langloisia					Palms to Pines Highway, Riverside County, California		native	145	119	145	http://eol.org/data_objects/12517641	too vague	0.833333	0.17931	0.568627	300	18	57	23.3333	1091			http://purl.obolibrary.org/obo/PATO_0000321
Sisyrinchium idahoense	Iridaceae	Idaho Blue-eyed-grass			1828.8		Cedars, lower Cedar Meadow, 6000', Placer County, California		native	144	113	234	http://eol.org/data_objects/12526430	unable to locate	0.709366	0.517094	0.917647	255.372	52	92	10.9366	1150	Y		http://eol.org/schema/terms/purplish-blue
Lobelia kalmii	Campanulaceae	Kalm's Lobelia					NE Illinois		native	180	183	252	http://eol.org/data_objects/24109832	too vague	0.659722	0.285714	0.988235	237.5	29	99	5.97222	1101			http://eol.org/schema/terms/greenish-blue
Lobelia kalmii	Campanulaceae	Kalm's Lobelia					NE Illinois		native	188	185	220	http://eol.org/data_objects/24109831	too vague	0.680952	0.159091	0.862745	245.143	16	86	8.09524	1100			http://eol.org/schema/terms/purplish-blue
Symphyotrichum cordifolium	Asteraceae	Lowrie's Blue Wood Aster					west-central Indiana		native	174	184	202	http://eol.org/data_objects/24110479	too vague	0.607143	0.138614	0.792157	218.571	14	79	0.714286	1154	Y		http://eol.org/schema/terms/greenish-blue
Symphyotrichum cordifolium	Asteraceae	Lowrie's Blue Wood Aster					west-central Indiana		native	204	202	220	http://eol.org/data_objects/24110477	too vague	0.685185	0.0818182	0.862745	246.667	8	86	8.51852	1155	Y		http://eol.org/schema/terms/purplish-blue
Hackelia floribunda	Boraginaceae	Manyflower Stickseed			2072.64		Cedars, meadowbetween Airpln. Md.& Noak intk, , Placer County, California		native	199	238	250	http://eol.org/data_objects/12516334	unable to locate	0.539216	0.204	0.980392	194.118	20	98	-6.07843	1076			http://eol.org/schema/terms/greenish-blue
Campanula scouleri	Campanulaceae	Pale Bellflower					US		native	179	175	166	http://eol.org/data_objects/13555641	too vague	0.115385	0.0726257	0.701961	41.5385	7	70	-48.4615	1053			http://purl.obolibrary.org/obo/PATO_0001944
Campanula scouleri	Campanulaceae	Pale Bellflower					US		native	144	127	151	http://eol.org/data_objects/23354126	too vague	0.784722	0.15894	0.592157	282.5	16	59	18.4722	1052			http://eol.org/schema/terms/purplish-blue
Trichostema parishii	Lamiaceae	Parish's Bluecurls					Santa Rosa Mountain Road, Riverside County, California		native	123	101	210	http://eol.org/data_objects/13270367	too vague	0.700306	0.519048	0.823529	252.11	52	82	10.0306	1163	Y		http://eol.org/schema/terms/purplish-blue
Linum lewisii	Linaceae	Prairie Flax					Cedars, dry slopes Castle Pk., 8000', Placer County, California		native	125	121	216	http://eol.org/data_objects/12518345		0.673684	0.439815	0.847059	242.526	44	85	7.36842	1097			http://eol.org/schema/terms/purplish-blue
Linum lewisii	Linaceae	Prairie Flax					Montana		native	126	113	183	http://eol.org/data_objects/24959752	too vague	0.697619	0.382514	0.717647	251.143	38	72	9.7619	1098			http://eol.org/schema/terms/purplish-blue
Campanula scabrella	Campanulaceae	Rough Bellflower					US		native	130	117	130	http://eol.org/data_objects/23354124	too vague	0.833333	0.1	0.509804	300	10	51	23.3333	1051			http://purl.obolibrary.org/obo/PATO_0000321
Campanula scabrella	Campanulaceae	Rough Bellflower					US		native	160	152	157	http://eol.org/data_objects/23354122	too vague	0.895833	0.05	0.627451	322.5	5	63	29.5833	1050			http://eol.org/schema/terms/reddish-purple
Linanthus parryae	Polemoniaceae	Sandblossoms					Kraner Jet	unknown	native	181	160	144	http://eol.org/data_objects/12518324	unable to locate	0.0720721	0.20442	0.709804	25.9459	20	71	-52.7928	1095			http://eol.org/schema/terms/orangish-red
Linanthus parryae	Polemoniaceae	Sandblossoms					south end of the Sierra Nevada		native	207	211	198	http://eol.org/data_objects/13144703	too vague	0.217949	0.0616114	0.827451	78.4615	6	83	-38.2051	1096			http://purl.obolibrary.org/obo/PATO_0001941
Polemonium pulcherrimum	Polemoniaceae	Showy Jacob's-ladder			2590.8		Cedars, loose gravel, rock shoot, Anderson, 8500', Placer County, California		native	153	154	231	http://eol.org/data_objects/12523801	unable to locate	0.66453	0.337662	0.905882	239.231	34	91	6.45299	1142			http://eol.org/schema/terms/greenish-blue
Gentianopsis holopetala	Gentianaceae	Sierra Fringed Gentian					Hoover Wilderness area, Mono County, California		native	137	103	150	http://eol.org/data_objects/12515781		0.787234	0.313333	0.588235	283.404	31	59	18.7234	1074			http://eol.org/schema/terms/purplish-blue
Gentianopsis holopetala	Gentianaceae	Sierra Fringed Gentian					Lyell Canyon, John Muir Trail, Yosemite NP, Tuolumne County, California		native	120	106	214	http://eol.org/data_objects/23373065		0.688272	0.504673	0.839216	247.778	50	84	8.82716	1075			http://eol.org/schema/terms/purplish-blue
Lupinus grayi	Fabaceae	Sierra Lupine			1828.8		Cedars, dry rocky slopes above house, 6000', Placer County, California		native	148	113	187	http://eol.org/data_objects/12518843	unable to locate	0.745495	0.395722	0.733333	268.378	40	73	14.5495	1108			http://eol.org/schema/terms/purplish-blue
Symphyotrichum oolentangiense	Asteraceae	Skyblue Aster					Bobby Douglas Site, Indiana		native	184	159	209	http://eol.org/data_objects/1341634	unable to locate	0.75	0.239234	0.819608	270	24	82	15	1158	Y		http://eol.org/schema/terms/purplish-blue
Symphyotrichum oolentangiense	Asteraceae	Skyblue Aster					Bobby Douglas Site, Indiana		native	177	161	190	http://eol.org/data_objects/1341635	unable to locate	0.758621	0.152632	0.745098	273.103	15	75	15.8621	1159	Y		http://eol.org/schema/terms/purplish-blue
Symphyotrichum oolentangiense	Asteraceae	Skyblue Aster					Bobby Douglas Site, Indiana		native	182	138	197	http://eol.org/data_objects/1341639	unable to locate	0.79096	0.299492	0.772549	284.746	30	77	19.096	1160	Y		http://eol.org/schema/terms/purplish-blue
Camassia quamash subsp. quamash	Asparagaceae	Small Camas					Upper Nye Basin, Lake County, California, US		native	114	98	117	http://eol.org/data_objects/12509632	appears to be an older slide; too vague	0.807018	0.162393	0.458824	290.526	16	46	20.7018	1047			http://eol.org/schema/terms/purplish-blue
Nemophila aphylla	Boraginaceae	Small-flower Baby-blue-eyes							native	247	249	242	http://eol.org/data_objects/23290412		0.214286	0.0281124	0.976471	77.1429	3	98	-38.5714	1126	Y		http://purl.obolibrary.org/obo/PATO_0001941
Delphinium patens	Ranunculaceae	Spreading Larkspur					Hornitos, Mariposa County, California		native	73	55	106	http://eol.org/data_objects/12512805		0.72549	0.481132	0.415686	261.176	48	42	12.549	1062			http://eol.org/schema/terms/purplish-blue
Lupinus succulentus	Fabaceae	Succulent Annual Lupine					Old Big Sur Road, Monterey County, California		native	78	57	80	http://eol.org/data_objects/12518952	too vague	0.818841	0.2875	0.313725	294.783	29	31	21.8841	1120			http://eol.org/schema/terms/purplish-blue
Lupinus flavoculatus	Fabaceae	Yellow-eye Lupine					Utah, road to St. George from Las Vegas		native	164	151	207	http://eol.org/data_objects/22730847	too vague	0.705357	0.270531	0.811765	253.929	27	81	10.5357	1107			http://eol.org/schema/terms/purplish-blue
Lupinus flavoculatus	Fabaceae	Yellow-eye Lupine					Utah, road to St. George from Las Vegas		native	92	66	125	http://eol.org/data_objects/22730714	too vague	0.740113	0.472	0.490196	266.441	47	49	14.0113	1106			http://eol.org/schema/terms/purplish-blue
Hedeoma pulegioides	Lamiaceae	American False Pennyroyal								177	200	213	http://eol.org/data_objects/24110812		0.560185	0.169014	0.835294	201.667	17	84	-3.98148	1078			http://eol.org/schema/terms/greenish-blue
Hedeoma pulegioides	Lamiaceae	American False Pennyroyal								187	193	213	http://eol.org/data_objects/23352892		0.628205	0.122066	0.835294	226.154	12	84	2.82051	1079			http://eol.org/schema/terms/greenish-blue
Hedeoma pulegioides	Lamiaceae	American False Pennyroyal								236	203	244	http://eol.org/data_objects/23290607		0.800813	0.168033	0.956863	288.293	17	96	20.0813	1077			http://eol.org/schema/terms/purplish-blue
Agastache foeniculum	Lamiaceae	Blue Giant Hyssop								140	131	195	http://eol.org/data_objects/24106841		0.690104	0.328205	0.764706	248.438	33	76	9.01042	1032	Y		http://eol.org/schema/terms/purplish-blue
Agastache foeniculum	Lamiaceae	Blue Giant Hyssop								155	134	139	http://eol.org/data_objects/773		0.960317	0.135484	0.607843	345.714	14	61	36.0317	1033	Y		http://eol.org/schema/terms/reddish-purple
Bacopa caroliniana	Plantaginaceae	Blue Waterhyssop								190	185	225	http://eol.org/data_objects/1378613	selected from multiple specimens	0.6875	0.177778	0.882353	247.5	18	88	8.75	1037	Y		http://eol.org/schema/terms/purplish-blue
Baptisia australis	Fabaceae	Blue Wild Indigo								161	139	128	http://eol.org/data_objects/24107082		0.0555556	0.204969	0.631373	20	20	63	-54.4444	1040	Y		http://eol.org/schema/terms/orangish-red
Baptisia australis var. minor	Fabaceae	Blue Wild Indigo								69	50	95	http://eol.org/data_objects/22709627		0.737037	0.473684	0.372549	265.333	47	37	13.7037	1042	Y		http://eol.org/schema/terms/purplish-blue
Baptisia australis	Fabaceae	Blue Wild Indigo								154	96	200	http://eol.org/data_objects/23290449		0.759615	0.52	0.784314	273.462	52	78	15.9615	1039	Y		http://eol.org/schema/terms/purplish-blue
Baptisia australis	Fabaceae	Blue Wild Indigo								134	96	152	http://eol.org/data_objects/2925		0.779762	0.368421	0.596078	280.714	37	60	17.9762	1041	Y		http://eol.org/schema/terms/purplish-blue
Lactuca floridana	Asteraceae	Blue Woodland Lettuce								223	175	212	http://eol.org/data_objects/23291466		0.871528	0.215247	0.87451	313.75	22	87	27.1528	1087	Y		http://eol.org/schema/terms/reddish-purple
Lupinus obtusilobus	Fabaceae	Blunt-lobe Lupine								97	92	164	http://eol.org/data_objects/23392933		0.678241	0.439024	0.643137	244.167	44	64	7.82407	1115			http://eol.org/schema/terms/purplish-blue
Lupinus obtusilobus	Fabaceae	Blunt-lobe Lupine								155	144	181	http://eol.org/data_objects/22709650		0.716216	0.20442	0.709804	257.838	20	71	11.6216	1117			http://eol.org/schema/terms/purplish-blue
Lupinus obtusilobus	Fabaceae	Blunt-lobe Lupine								87	45	161	http://eol.org/data_objects/5917173		0.727011	0.720497	0.631373	261.724	72	63	12.7011	1118			http://eol.org/schema/terms/purplish-blue
Lupinus obtusilobus	Fabaceae	Blunt-lobe Lupine								202	179	220	http://eol.org/data_objects/23291983		0.760163	0.186364	0.862745	273.659	19	86	16.0163	1116			http://eol.org/schema/terms/purplish-blue
Phacelia bolanderi	Plantaginaceae	Bolander's Phacelia								223	224	219	http://eol.org/data_objects/23559358		0.2	0.0223214	0.878431	72	2	88	-40	1134			http://purl.obolibrary.org/obo/PATO_0001941
Phacelia bolanderi	Plantaginaceae	Bolander's Phacelia								206	209	201	http://eol.org/data_objects/23559357		0.229167	0.0382775	0.819608	82.5	4	82	-37.0833	1133			http://purl.obolibrary.org/obo/PATO_0001941
Phacelia bolanderi	Plantaginaceae	Bolander's Phacelia								148	159	199	http://eol.org/data_objects/23559356		0.630719	0.256281	0.780392	227.059	26	78	3.0719	1132			http://eol.org/schema/terms/greenish-blue
Polygala vulgaris	Polygalaceae	Common Milkwort					subalpine region of southern Bavaria	No		251	101	230	http://eol.org/data_objects/21522927	too vague	0.856667	0.59761	0.984314	308.4	60	98	25.6667	1143			http://eol.org/schema/terms/reddish-purple
Navarretia pubescens	Polemoniaceae	Downy Navarretia								74	48	98	http://eol.org/data_objects/23393635		0.753333	0.510204	0.384314	271.2	51	38	15.3333	1124			http://eol.org/schema/terms/purplish-blue
Navarretia pubescens	Polemoniaceae	Downy Navarretia								115	84	140	http://eol.org/data_objects/23393636		0.758929	0.4	0.54902	273.214	40	55	15.8929	1125			http://eol.org/schema/terms/purplish-blue
Nemophila pulchella	Boraginaceae	Eastwood's Baby-blue-eyes								212	187	206	http://eol.org/data_objects/23559338		0.873333	0.117925	0.831373	314.4	12	83	27.3333	1127	Y		http://eol.org/schema/terms/reddish-purple
Ageratum houstonianum	Asteraceae	Floss Flower								193	182	216	http://eol.org/data_objects/811		0.720588	0.157407	0.847059	259.412	16	85	12.0588	1035			http://eol.org/schema/terms/purplish-blue
Ageratum houstonianum	Asteraceae	Floss Flower								203	186	229	http://eol.org/data_objects/805		0.732558	0.187773	0.898039	263.721	19	90	13.2558	1034			http://eol.org/schema/terms/purplish-blue
Leptosiphon harknessii	Polemoniaceae	Harkness' Flaxflower								254	253	253	http://eol.org/data_objects/23393601		0	0.00393701	0.996078	0	0	100	-60	1094			http://purl.obolibrary.org/obo/PATO_0000322
Leptosiphon harknessii	Polemoniaceae	Harkness' Flaxflower								238	230	220	http://eol.org/data_objects/23393600		0.0925926	0.0756303	0.933333	33.3333	8	93	-50.7407	1093			http://purl.obolibrary.org/obo/PATO_0001944
Leptosiphon harknessii	Polemoniaceae	Harkness' Flaxflower								237	229	205	http://eol.org/data_objects/23393599		0.125	0.135021	0.929412	45	14	93	-47.5	1092			http://purl.obolibrary.org/obo/PATO_0001944
Sisyrinchium idahoense	Iridaceae	Idaho Blue-eyed-grass								116	107	181	http://eol.org/data_objects/1394775		0.686937	0.40884	0.709804	247.297	41	71	8.69369	1151	Y		http://eol.org/schema/terms/purplish-blue
Viola cucullata	Violaceae	Marsh Blue Violet								148	155	207	http://eol.org/data_objects/1397220		0.646893	0.285024	0.811765	232.881	29	81	4.68927	1164	Y		http://eol.org/schema/terms/greenish-blue
Viola cucullata	Violaceae	Marsh Blue Violet								226	155	238	http://eol.org/data_objects/23291515		0.809237	0.348739	0.933333	291.325	35	93	20.9237	1165	Y		http://eol.org/schema/terms/purplish-blue
Lupinus sparsiflorus	Fabaceae	Mohave Lupine								103	100	178	http://eol.org/data_objects/23392981		0.673077	0.438202	0.698039	242.308	44	70	7.30769	1119			http://eol.org/schema/terms/purplish-blue
Gentiana saponaria	Gentianaceae	Moss Gentian								155	122	176	http://eol.org/data_objects/23290735		0.768519	0.306818	0.690196	276.667	31	69	16.8519	1073			http://eol.org/schema/terms/purplish-blue
Gentiana saponaria	Gentianaceae	Moss Gentian								226	186	242	http://eol.org/data_objects/23290447		0.785714	0.231405	0.94902	282.857	23	95	18.5714	1072			http://eol.org/schema/terms/purplish-blue
Anemone narcissiflora	Ranunculaceae	Narcissus Thimbleweed								219	223	204	http://eol.org/data_objects/2444342		0.201754	0.0852018	0.87451	72.6316	9	87	-39.8246	1036			http://purl.obolibrary.org/obo/PATO_0001941
Campanula scouleri	Campanulaceae	Pale Bellflower								201	202	221	http://eol.org/data_objects/22942372		0.658333	0.0904977	0.866667	237	9	87	5.83333	1056			http://eol.org/schema/terms/greenish-blue
Campanula scouleri	Campanulaceae	Pale Bellflower								197	187	221	http://eol.org/data_objects/12509777		0.715686	0.153846	0.866667	257.647	15	87	11.5686	1054			http://eol.org/schema/terms/purplish-blue
Campanula scouleri	Campanulaceae	Pale Bellflower								183	163	205	http://eol.org/data_objects/22942370		0.746032	0.204878	0.803922	268.571	20	80	14.6032	1055			http://eol.org/schema/terms/purplish-blue
Eryngium aquaticum	Apiaceae	Rattlesnakemaster								205	190	181	http://eol.org/data_objects/23291482		0.0625	0.117073	0.803922	22.5	12	80	-53.75	1070			http://eol.org/schema/terms/orangish-red
Eryngium aquaticum	Apiaceae	Rattlesnakemaster								167	231	231	http://eol.org/data_objects/22943430		0.5	0.277056	0.905882	180	28	91	-10	1071			http://eol.org/schema/terms/greenish-blue
Ionactis linariifolia	Asteracea	Savoryleaf Aster								220	185	164	http://eol.org/data_objects/23560247		0.0625	0.254545	0.862745	22.5	25	86	-53.75	1080			http://eol.org/schema/terms/orangish-red
Ionactis linariifolia	Asteracea	Savoryleaf Aster								170	131	97	http://eol.org/data_objects/23560249		0.0776256	0.429412	0.666667	27.9452	43	67	-52.2374	1082			http://eol.org/schema/terms/orangish-red
Ionactis linariifolia	Asteracea	Savoryleaf Aster								242	236	181	http://eol.org/data_objects/23560248		0.150273	0.252066	0.94902	54.0984	25	95	-44.9727	1081			http://purl.obolibrary.org/obo/PATO_0001944
Lupinus brevicaulis	Fabaceae	Shortstem Lupine								99	95	147	http://eol.org/data_objects/23392756		0.679487	0.353741	0.576471	244.615	35	58	7.94872	1105			http://eol.org/schema/terms/purplish-blue
Lupinus grayi	Fabaceae	Sierra Lupine								101	70	136	http://eol.org/data_objects/23392844		0.744949	0.485294	0.533333	268.182	49	53	14.4949	1109			http://eol.org/schema/terms/purplish-blue
Lupinus grayi	Fabaceae	Sierra Lupine								108	77	112	http://eol.org/data_objects/23392846		0.814286	0.3125	0.439216	293.143	31	44	21.4286	1111			http://eol.org/schema/terms/purplish-blue
Lupinus grayi	Fabaceae	Sierra Lupine								167	121	167	http://eol.org/data_objects/23392845		0.833333	0.275449	0.654902	300	28	65	23.3333	1110			http://purl.obolibrary.org/obo/PATO_0000321
Lupinus argenteus var. meionanthus	Fabaceae	Silvery Lupine								189	191	208	http://eol.org/data_objects/23392905		0.649123	0.0913462	0.815686	233.684	9	82	4.91228	1103			http://eol.org/schema/terms/greenish-blue
Lupinus argenteus	Fabaceae	Silvery Lupine								135	124	203	http://eol.org/data_objects/23392722		0.689873	0.389163	0.796078	248.354	39	80	8.98734	1102			http://eol.org/schema/terms/purplish-blue
Lupinus argenteus var. meionanthus	Fabaceae	Silvery Lupine								178	172	199	http://eol.org/data_objects/23392904		0.703704	0.135678	0.780392	253.333	14	78	10.3704	1104			http://eol.org/schema/terms/purplish-blue
Brodiaea stellaris	Asparagaceae	Starflower Brodiaea								142	82	175	http://eol.org/data_objects/23389987		0.774194	0.531429	0.686275	278.71	53	69	17.4194	1044			http://eol.org/schema/terms/purplish-blue
Brodiaea stellaris	Asparagaceae	Starflower Brodiaea								145	76	98	http://eol.org/data_objects/23389989		0.94686	0.475862	0.568627	340.87	48	57	34.686	1046			http://eol.org/schema/terms/reddish-purple
Brodiaea stellaris	Asparagaceae	Starflower Brodiaea								148	76	88	http://eol.org/data_objects/23389988		0.972222	0.486486	0.580392	350	49	58	37.2222	1045			http://eol.org/schema/terms/reddish-purple
Mertensia paniculata	Boraginaceae	Tall Bluebells								184	177	177	http://eol.org/data_objects/23388307		0	0.0380435	0.721569	0	4	72	-60	1121	Y		http://purl.obolibrary.org/obo/PATO_0000322
Mertensia paniculata	Boraginaceae	Tall Bluebells								165	155	167	http://eol.org/data_objects/23388309		0.805556	0.0718563	0.654902	290	7	65	20.5556	1122	Y		http://eol.org/schema/terms/purplish-blue
Eriastrum pluriflorum	Polemoniaceae	Tehachapi Woollystar								189	177	203	http://eol.org/data_objects/23393432		0.74359	0.128079	0.796078	267.692	13	80	14.359	1068			http://eol.org/schema/terms/purplish-blue
Eriastrum pluriflorum	Polemoniaceae	Tehachapi Woollystar								160	120	174	http://eol.org/data_objects/23393433		0.790123	0.310345	0.682353	284.444	31	68	19.0123	1069			http://eol.org/schema/terms/purplish-blue
Eriastrum pluriflorum	Polemoniaceae	Tehachapi Woollystar								200	179	197	http://eol.org/data_objects/13155054		0.857143	0.105	0.784314	308.571	11	78	25.7143	1067			http://eol.org/schema/terms/reddish-purple
RED										255	0	0			0	1	1	0	100	100	-60	1166			http://purl.obolibrary.org/obo/PATO_0000322
GREEN										0	255	0			0.333333	1	1	120	100	100	-26.6667	1167			http://purl.obolibrary.org/obo/PATO_0000320
CYAN										0	255	255			0.5	1	1	180	100	100	-10	1170			http://eol.org/schema/terms/greenish-blue
BLUE										0	0	255			0.666667	1	1	240	100	100	6.66667	1168			http://purl.obolibrary.org/obo/PATO_0000318
Pinguicula gigantea	Lentibulariaceae									210	192	225	http://eol.org/data_objects/5897496		0.757576	0.146667	0.882353	272.727	15	88	15.7576	1138			http://eol.org/schema/terms/purplish-blue
Pinguicula gigantea	Lentibulariaceae									111	73	138	http://eol.org/data_objects/5897495		0.764103	0.471014	0.541176	275.077	47	54	16.4103	1137			http://eol.org/schema/terms/purplish-blue
MAGENTA										255	0	255			0.833333	1	1	300	100	100	23.3333	1169			http://purl.obolibrary.org/obo/PATO_0000321
Pinguicula gigantea	Lentibulariaceae									174	155	172	http://eol.org/data_objects/5897497		0.850877	0.109195	0.682353	306.316	11	68	25.0877	1139			http://eol.org/schema/terms/reddish-purple
