# Supplementary material for: Usage patterns of blue flower color representation by Encyclopedia of Life content providers
Source: Biodivers Data J. 2014 Aug 11;(2):e1143. doi: 10.3897/BDJ.2.e1143 (PMC4152829; doi:10.3897/BDJ.2.e1143)
Supplement: Supplementary material 6 — Color Terms and URI [file biodiversity_data_journal-2-e1143-s006.xls]

## Sheet: Sheet1
Term	PATO URI	eol URI	Present PATO Definition	Suggested Definition	Source of Definition	Suggested Relations	Suggested Synonym	Note
blue	http://purl.obolibrary.org/obo/PATO_0000318		A color hue with low wavelength of that portion of the visible spectrum lying between green and indigo, evoked in the human observer by radiant energy with wavelengths of approximately 420 to 490 nanometers.	A color hue with low wavelength of that portion of the visible spectrum lying between green and indigo, evoked in the human observer by radiant energy with wavelengths of approximately 420 to 490 nanometers or a hue value of 240°.	Wright C. and Seltmann, K.C. Color representation of blue flowers by Encyclopedia of Life content providers.The Biodiversity Data Journal (In prep) 2014; http://en.wikipedia.org/wiki/Blue	is_a: PATO:0000014 ! color
cyan	http://purl.obolibrary.org/obo/PATO_0000319		A color consisting of green and blue hue.	A color consisting of green and blue hue, with a hue value of 180°.	Wright and Seltmann 2014; http://en.wikipedia.org/wiki/Cyan	is_a: PATO:0000014 ! color
green	http://purl.obolibrary.org/obo/PATO_0000320		A color hue with medium-low wavelength of that portion of the visible spectrum lying between yellow and blue, evoked in the human observer by radiant energy with wavelengths of approximately 490 to 570 nanometers.	A color hue with medium-low wavelength of that portion of the visible spectrum lying between yellow and blue, evoked in the human observer by radiant energy with wavelengths of approximately 490 to 570 nanometers, or a hue value of 120°.	http://dictionary.reference.com/; Wright and Seltmann 2014;	is_a: PATO:0000014 ! color		Pato has the wavelength at approx 490 but according to wikipedia that value should be 520
magenta	http://purl.obolibrary.org/obo/PATO_0000321		A color consisting of red and blue hues.	A color consisting of red and blue hues, with a hue value of 300°.	Wright and Seltmann 2014; http://en.wikipedia.org/wiki/Magenta	is_a: PATO:0000014 ! color
orange	http://purl.obolibrary.org/obo/PATO_0000953		A color hue with high-medium wavelength that of that portion of the visible spectrum lying between red and yellow, evoked in the human observer by radiant energy with wavelengths of approximately 585 to 620 nanometers.	A color hue with high-medium wavelength of that portion of the visible spectrum lying between red and yellow, evoked in the human observer by radiant energy with wavelengths of approximately 585 to 620 nanometers or a hue value of 30°.	Wright and Seltmann 2014; http://en.wikipedia.org/wiki/Orange_%28colour%29	is_a: PATO:0000014 ! color
purple	http://purl.obolibrary.org/obo/PATO_0000951		A color that falls about midway between red and blue in hue.	A color that falls about midway between red and blue in hue, with a hue value of 300°, saturation at 100% and value of 50%.	Wright and Seltmann 2014; http://en.wikipedia.org/wiki/Purple	is_a: PATO:0000321 ! magenta		Purple is a magenta based on hsv, with hue same as magenta, only the value is reduced by 50%
red	http://purl.obolibrary.org/obo/PATO_0000322		A color hue with high wavelength of the long-wave end of the visible spectrum, evoked in the human observer by radiant energy with wavelengths of approximately 630 to 750 nanometers.	A color hue with high wavelength of the long-wave end of the visible spectrum, evoked in the human observer by radiant energy with wavelengths of approximately 630 to 750 nanometers, or a hue value of 0° (360°).	Wright and Seltmann 2014; http://en.wikipedia.org/wiki/Red	is_a: PATO:0000014 ! color		Since the hue values are based on the color wheel, 0° and 360° values are the same.
violet	http://purl.obolibrary.org/obo/PATO_0001424		A color hue with very low wavelength of that portion of the visible spectrum lying between reddish blue or bluish purple, evoked in the human observer by radiant energy with wavelengths of approximately 420 to 380 nanometers.	A color hue with very low wavelength of that portion of the visible spectrum lying between reddish blue or bluish purple, evoked in the human observer by radiant energy with wavelengths of approximately 420 to 380 nanometers, or a hue value of 274°.	Wright and Seltmann 2014; http://en.wikipedia.org/wiki/Violet_%28color%29	is_a: PATO:0000014 ! color
yellow	http://purl.obolibrary.org/obo/PATO_0000324		A color hue with medium wavelength of that portion of the visible spectrum lying between orange and green, evoked in the human observer by radiant energy with wavelengths of approximately 570 to 590 nanometers.	A color hue with medium wavelength of that portion of the visible spectrum lying between orange and green, evoked in the human observer by radiant energy with wavelengths of approximately 570 to 590 nanometers, or a hue value of 60°.	Wright and Seltmann 2014; http://en.wikipedia.org/wiki/Yellow	is_a: PATO:0000014 ! color
orangish-red		http://eol.org/schema/terms/orangish-red		A color with a hue between that of red and orange, with a hue value between 0° and 30°.	Wright and Seltmann 2014	is_a: PATO:0000014 ! color	reddish-orange	reddish-orange and orangish-red could be considered further subdivided into 2 concepts, with further granulated hsv ranges. However it is unclear that this level of detail would be useful. The same hesitation to further subdivide all of the "ish" colors was considered, and synonyms created instead of splitting them out into new concepts.
reddish-orange		http://eol.org/schema/terms/reddish-orange		A color with a hue between that of red and orange, with a hue value between 0° and 30°.	Wright and Seltmann 2014	is_a: PATO:0000014 ! color	orangish-red
orangish-yellow	http://purl.obolibrary.org/obo/PATO_0001944		A color consisting of yellow and orange hue.	A color with a hue between that of orange and yellow, with a hue value between 30° and 60°.	Wright and Seltmann 2014	is_a: PATO:0000014 ! color	yellowish-orange; yellow orange
yellowish-orange	http://purl.obolibrary.org/obo/PATO_0001944		A color consisting of yellow and orange hue.	A color with a hue between that of orange and yellow, with a hue value between 30° and 60°.	Wright and Seltmann 2014	is_a: PATO:0000014 ! color	orangish-yellow;yellow orange
yellowish-green	http://purl.obolibrary.org/obo/PATO_0001941		A color consisting of yellow and green hues.	A color with a hue between that of green and yellow, with a hue value between 60° and 120°.	Wright and Seltmann 2014	is_a: PATO:0000014 ! color	greenish-yellow;yellow green
greenish-yellow	http://purl.obolibrary.org/obo/PATO_0001941		A color consisting of yellow and green hues.	A color with a hue between that of green and yellow, with a hue value between 60° and 120°.	Wright and Seltmann 2014	is_a: PATO:0000014 ! color	yellowish-green; yellow green
greenish-blue		http://eol.org/schema/terms/greenish-blue		A color with a hue between that of green and blue, with a hue value between 120° and 240° .	Wright and Seltmann 2014	is_a: PATO:0000014 ! color	bluish-green
bluish-green		http://eol.org/schema/terms/bluish-green		A color with a hue between that of blue and green, with a hue value between 120° and 240°.	Wright and Seltmann 2014	is_a: PATO:0000014 ! color	greenish-blue
bluish-purple		http://eol.org/schema/terms/bluish-purple		A color with a hue between that of blue and purple, with a hue value between 240° and 300°.	Wright and Seltmann 2014	is_a: PATO:0000014 ! color	purplish-blue; magentaish-blue;bluish-magenta
purplish-blue		http://eol.org/schema/terms/purplish-blue		A color with a hue between that of purple and blue, with a hue value between 240° and 300°.	Wright and Seltmann 2014	is_a: PATO:0000014 ! color	bluish-purple; bluish-magenta;magentaish-bluish
purplish-red		http://eol.org/schema/terms/purplish-red		A color with a hue between that of purple and red, with a hue value between 300° and 360°.	Wright and Seltmann 2014	is_a: PATO:0000014 ! color	reddish-purple;reddish-magenta;magentaish-redish
reddish-purple		http://eol.org/schema/terms/reddish-purple		A color with a hue between that of red and purple, with a hue value between 300° and 360°.	Wright and Seltmann 2014	is_a: PATO:0000014 ! color	purplish-red;magentaish-red;redish-magenta
